# Supplementary material for: Synthesis of 2-aminofurans and 2-unsubstituted furans via carbenoid-mediated [3 + 2] cycloaddition
Source: Royal Society of Chemistry journal article supplement (doi:10.1039/c2cc18139h), 2012-01-01

## Supporting Information

# Synthesis of 2-Aminofurans and 2-Unsubstituted Furans via Carbenoid-mediated [3+2] Cycloaddition

Yaojia Jiang, Vanessa Zhong Yue Khong, Emmanuvel Lourdusamy and Cheol-Min Park\*

Division of Chemistry and Biological Chemistry, School of Physical and Mathematical Sciences,  
Nanyang Technological University, Singapore 637371, Singapore

E-mail: [cmpark@ntu.edu.sg](mailto:cmpark@ntu.edu.sg)

## Table of Contents

|                                                                                |    |
|--------------------------------------------------------------------------------|----|
| General methods -----                                                          | 2  |
| General procedure for $\alpha$ -diazo compounds and their spectral data -----  | 3  |
| General procedure for enamines and their spectral data-----                    | 10 |
| General procedure for 2-aminofurans and spectral data -----                    | 13 |
| General procedure for 2-unsubstituted furans and spectral data -----           | 19 |
| $^1\text{H}$ and $^{13}\text{C}$ NMR spectra of $\alpha$ -diazo compounds----- | 23 |
| $^1\text{H}$ and $^{13}\text{C}$ NMR spectra of enamines-----                  | 42 |
| $^1\text{H}$ and $^{13}\text{C}$ NMR spectra of 2-aminofurans -----            | 45 |
| $^1\text{H}$ and $^{13}\text{C}$ NMR spectra of 2-Unsubstituted furans -----   | 61 |

**General methods:** All reactions were carried out in flame or oven dried glasswares under nitrogen atmosphere with freshly distilled dry solvents under anhydrous conditions unless otherwise indicated. Flash column chromatography was performed with silica gel 60 (230 – 400 mesh). Chromatograms were visualized by fluorescence quenching with UV light at 254 nm or by staining using base solution of potassium permanganate and molybdate. NMR spectra were recorded at RT on 300 M Hz Bruker ACF 300, 400 M Hz Bruker DPX 400, 500 M Hz Bruker AMX 500, and 400 M Hz JEOL ECA 400 NMR spectrometers. The residual solvent signals were taken as the reference (0.00 ppm or 7.26 ppm for  $^1\text{H}$  NMR spectra and 77.0 ppm for  $^{13}\text{C}$  NMR spectra in  $\text{CDCl}_3$ ). Chemical shift ( $\delta$ ) is reported in ppm, coupling constants ( $J$ ) are given in Hz. The following abbreviations classify the multiplicity: s = singlet, d = doublet, t = triplet, m = multiplet, dd = doublet of doublet, q = quartet and br = broad signal. HRMS (ESI) spectra were recorded on a Waters Q-ToF premier<sup>TM</sup> mass spectrometer.

**Materials:** All solvents were distilled under nitrogen from the following drying agents immediately before use: acetonitrile and dichloroethane were distilled from  $\text{P}_2\text{O}_5$ .

### General procedure for the $\alpha$ -diazo compounds (1a - 1r):

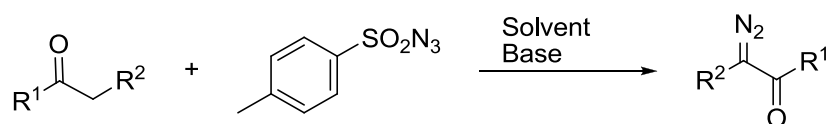

Method A: To a solution of  $\beta$ -ketoester or ketone (1.0 eq.) and 4-methylbenzenesulfonyl azide (1.2 eq.) in  $\text{CH}_3\text{CN}$  at  $0^\circ\text{C}$  was added DBU (1.2 eq.) dropwise under nitrogen. The resulting solution was stirred at  $0^\circ\text{C}$  for 3 h and slowly brought to RT. Upon completion as indicated by thin layer chromatography (TLC), the reaction was quenched with water, extracted with ethyl acetate, and dried over anhydrous  $\text{Na}_2\text{SO}_4$ . The reaction mixture was concentrated under reduced pressure, and the crude material was purified by column chromatography (hexane/ethyl acetate = 9:1).

Method B: To a solution of  $\beta$ -diketone (1.0 eq.) and 4-methylbenzenesulfonyl azide (1.2 eq.) in ethanol at RT was added triethylamine (1.2 eq.) dropwise under nitrogen. The reaction mixture was stirred for 3 h at RT. Upon completion as indicated by thin layer chromatography (TLC), the reaction was quenched with water, extracted with ethyl acetate, and dried over anhydrous  $\text{Na}_2\text{SO}_4$ . The reaction mixture was concentrated under reduced pressure, and the crude material was purified by column chromatography (hexane/ethyl acetate = 9:1).

### Ethyl 2-diazo-3-oxo-3-phenylpropanoate (1a):

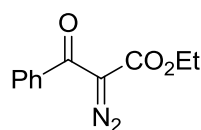

The title compound was prepared according to Method A. The product was obtained as yellow oil. Yield 80%;  $^1\text{H}$  NMR (400 MHz,  $\text{CDCl}_3$ )  $\delta$  7.64 - 7.61 (m, 2H), 7.55 (t,  $J = 7.4$  Hz, 1H), 7.53 - 7.41 (m, 2H), 4.25 (q,  $J = 7.2$  Hz, 2H), 1.26 (t,  $J = 7.2$  Hz, 3H);  $^{13}\text{C}$  NMR (100 MHz,  $\text{CDCl}_3$ )  $\delta$  187.0, 161.0, 137.1, 132.3, 128.3, 127.9, 61.6, 14.2; HRMS (ESI)  $m/z$   $[\text{M}+\text{H}]^+$ : Calcd for  $\text{C}_{11}\text{H}_{11}\text{N}_2\text{O}_3$ : 219.0770. Found: 219.0765.

### Methyl 2-diazo-3-oxobutanoate (1b):

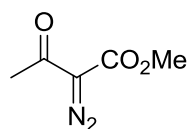

The title compound was prepared according to Method A. The product was obtained as yellow oil. Yield: 82%;  $^1\text{H}$  NMR (300 MHz,  $\text{CDCl}_3$ )  $\delta$  3.83 (s, 3H), 2.48 (s, 3H);  $^{13}\text{C}$  NMR (75 MHz,  $\text{CDCl}_3$ )  $\delta$  190.0, 161.8, 52.1, 28.1; HRMS (ESI)  $m/z$   $[\text{M}+\text{H}]^+$ : Calcd for  $\text{C}_5\text{H}_7\text{N}_2\text{O}_3$ : 143.0457. Found: 143.0462.

**Ethyl 2-diazo-3-oxobutanoate (1b')**:

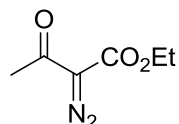

The title compound was prepared according to Method A. The product was obtained as yellow oil. Yield 90%;  $^1\text{H}$  NMR (300 MHz,  $\text{CDCl}_3$ )  $\delta$  4.28 (q,  $J = 7.2$  Hz, 2H), 2.45 (s, 3H), 1.31 (t,  $J = 7.2$  Hz, 3H);  $^{13}\text{C}$  NMR (75 MHz,  $\text{CDCl}_3$ )  $\delta$  190.2, 161.4, 61.4, 28.2, 14.3; HRMS (ESI)  $m/z$   $[\text{M}+\text{H}]^+$ : Calcd for  $\text{C}_6\text{H}_9\text{N}_2\text{O}_3$ : 157.0613. Found: 157.0609

**Methyl 2-diazo-3-oxo-4-phenylbutanoate (1c)**:

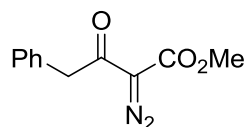

The title compound was prepared according to Method A. The product was obtained as yellow oil. Yield 75%;  $^1\text{H}$  NMR (400 MHz,  $\text{CDCl}_3$ )  $\delta$  7.32 - 7.25 (m, 5H), 4.19 (s, 2H), 3.85 (s, 3H);  $^{13}\text{C}$  NMR (100 MHz,  $\text{CDCl}_3$ )  $\delta$  190.1, 161.6, 134.0, 129.7, 128.5, 127.1, 52.3, 45.8; HRMS (ESI)  $m/z$   $[\text{M}+\text{H}]^+$ : Calcd for  $\text{C}_{11}\text{H}_{11}\text{N}_2\text{O}_3$ : 219.0770. Found: 219.0765.

**Methyl 2-diazo-3-oxo-5-phenylpentanoate (1d)**:

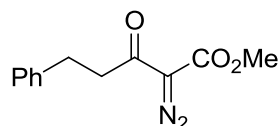

The title compound was prepared according to Method A. The product was obtained as yellow oil. Yield 53%;  $^1\text{H}$  NMR (400 MHz,  $\text{CDCl}_3$ )  $\delta$  7.33 - 7.20 (m, 5H), 3.85 (s, 3H), 3.21 (t,  $J = 7.6$  Hz, 2H), 2.99 (t,  $J = 7.4$  Hz, 2H);  $^{13}\text{C}$  NMR (100 MHz,  $\text{CDCl}_3$ )  $\delta$  191.8, 161.7,

140.8, 128.5, 128.5, 126.1, 52.2, 41.8, 30.2; HRMS (ESI)  $m/z$   $[M+H]^+$ : Calcd for  $C_{12}H_{13}N_2O_3$ : 233.0926. Found: 233.0931.

**Methyl 3-cyclohexyl-2-diazo-3-oxopropanoate (1e):**

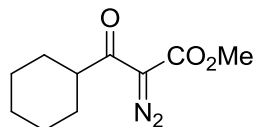

The title compound was prepared according to Method A. The product was obtained as yellow oil. Yield 75%;  $^1H$  NMR (300 MHz,  $CDCl_3$ )  $\delta$  3.83 (s, 3H), 3.35 - 3.28 (m, 1H), 1.81 - 1.67 (m, 5H), 1.47 - 1.19 (m, 5H);  $^{13}C$  NMR (100 MHz,  $CDCl_3$ )  $\delta$  195.9, 161.7, 52.1, 46.8, 28.7, 25.8, 25.7; HRMS (ESI)  $m/z$   $[M+H]^+$ : Calcd for  $C_{10}H_{15}N_2O_3$ : 211.1083. Found: 211.1090.

**(E)-methyl 2-diazo-3-oxo-5-phenylpent-4-enoate (1f):**

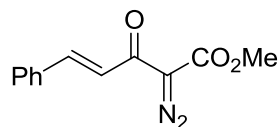

The title compound was prepared according to Method A. The product was obtained as yellow oil. Yield 90%;  $^1H$  NMR (300 MHz,  $CDCl_3$ )  $\delta$  7.87 (d,  $J$  = 20.8 Hz, 1H), 7.77 (d,  $J$  = 21.2 Hz, 1H), 7.64 - 7.61 (m, 2H), 7.40 - 7.38 (m, 3H), 3.88 (s, 3H);  $^{13}C$  NMR (100 MHz,  $CDCl_3$ )  $\delta$  181.4, 161.9, 143.0, 134.6, 130.6, 128.9, 128.7, 121.7, 52.2; HRMS (ESI)  $m/z$   $[M+H]^+$ : Calcd for  $C_{12}H_{11}N_2O_3$ : 231.0770. Found: 231.0767

**Methyl 2-diazo-3-(4-methoxyphenyl)-3-oxopropanoate (1g):**

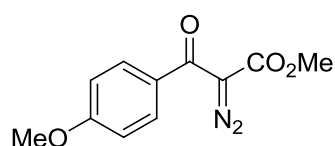

The title compound was prepared according to Method A. The product was obtained as yellow oil. Yield 85%;  $^1\text{H}$  NMR (400 MHz,  $\text{CDCl}_3$ )  $\delta$  7.67 (d,  $J$  = 12.0 Hz, 2H), 6.92 (d,  $J$  = 11.6 Hz, 2H), 3.86 (s, 3H), 3.81 (s, 3H);  $^{13}\text{C}$  NMR (100 MHz,  $\text{CDCl}_3$ )  $\delta$  185.2, 163.2, 161.8, 131.0, 129.3, 113.2, 55.4, 52.3; HRMS (ESI)  $m/z$   $[\text{M}+\text{H}]^+$ : Calcd for  $\text{C}_{11}\text{H}_{11}\text{N}_2\text{O}_4$ : 235.0719. Found: 235.0716.

#### Ethyl 2-diazo-3-(4-nitrophenyl)-3-oxopropanoate (1h):

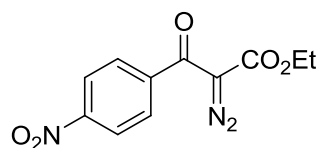

The title compound was prepared according to Method A. The product was obtained as red oil. Yield: 90%.  $^1\text{H}$  NMR (400 MHz,  $\text{CDCl}_3$ )  $\delta$  8.30 - 8.26 (m, 2H), 7.77 - 7.74 (m, 2H), 4.25 (q,  $J$  = 6.8 Hz, 2H), 1.27 (t,  $J$  = 7.2 Hz, 3H);  $^{13}\text{C}$  NMR (100 MHz,  $\text{CDCl}_3$ )  $\delta$  185.6, 160.3, 149.6, 142.5, 129.3, 123.1, 62.0, 14.2; HRMS (ESI)  $m/z$   $[\text{M}+\text{H}]^+$ : Calcd for  $\text{C}_{11}\text{H}_{10}\text{N}_3\text{O}_5$ : 264.0620. Found: 264.0622.

#### Diethyl 2-diazo-3-oxosuccinate (1i):

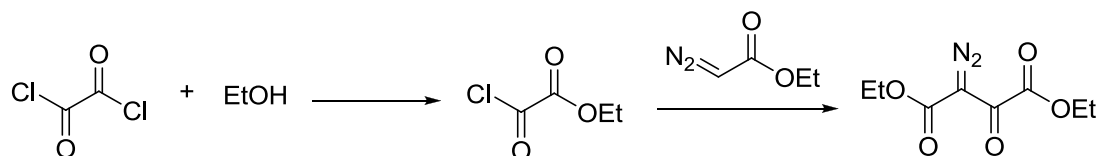

The title compound was prepared according to the following procedure.

Ethyl 2-chloro-2-oxoacetate: To oxalyl chloride (20 mmol, 1.72 mL) at 0 °C was added ethanol (10 mmol, 0.58 mL) dropwise with a syringe pump over 1 h. Upon completion of addition, the mixture was allowed to warm to RT over 2 h. The crude material was distilled under vacuum to give the desired product (1.02g, 75%);

Diethyl 2-diazo-3-oxosuccinate: To ethyl 2-chloro-2-oxoacetate (0.5 mmol, 55  $\mu\text{L}$ ) in 5 mL THF at 0 °C was added a solution of EDA (1.5 mmol, 158  $\mu\text{L}$ ) in 3 mL THF, and the mixture was stirred for another 3 h at 0 °C. Upon completion as indicated by thin layer chromatography (TLC), the reaction was quenched with water, extracted with ethyl acetate, and dried over anhydrous  $\text{Na}_2\text{SO}_4$ . The reaction mixture was concentrated under reduced

pressure, and the crude material was purified by column chromatography (hexane/ethyl acetate = 9:1).

The product was obtained as yellow oil. Yield 61%;  $^1\text{H}$  NMR (300 MHz,  $\text{CDCl}_3$ )  $\delta$  4.35 (m, 4H), 1.35 (m, 6H);  $^{13}\text{C}$  NMR (75 MHz,  $\text{CDCl}_3$ )  $\delta$  162.3, 159.9, 62.8, 62.3, 14.2, 13.9; HRMS (ESI)  $m/z$   $[\text{M}+\text{H}]^+$ : Calcd for  $\text{C}_8\text{H}_{11}\text{N}_2\text{O}_5$ : 215.0668. Found: 215.0665.

### 3-Diazopentane-2,4-dione (1j):

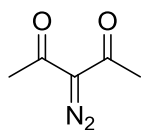

The title compound was prepared according to Method B. The product was obtained as yellow oil. Yield 80%;  $^1\text{H}$  NMR (400 MHz,  $\text{CDCl}_3$ )  $\delta$  2.42 (s, 6H);  $^{13}\text{C}$  NMR (100 MHz,  $\text{CDCl}_3$ )  $\delta$  188.2, 28.5; HRMS (ESI)  $m/z$   $[\text{M}+\text{H}]^+$ : Calcd for  $\text{C}_5\text{H}_7\text{N}_2\text{O}_2$ : 127.0512. Found: 127.0508.

### 2-Diazo-1,3-diphenylpropane-1,3-dione (1k):

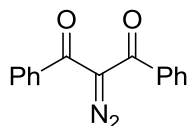

The title compound was prepared according to Method B. The product was obtained as yellow solid. mp: 105 - 107 °C. Yield: 88%.  $^1\text{H}$  NMR (400 MHz,  $\text{CDCl}_3$ )  $\delta$  7.61 - 7.58 (m, 4H), 7.47 - 7.44 (m, 2H), 7.36 - 7.32 (m, 4H);  $^{13}\text{C}$  NMR (100 MHz,  $\text{CDCl}_3$ )  $\delta$  186.5, 137.0, 132.6, 128.4, 128.3; HRMS (ESI)  $m/z$   $[\text{M}+\text{H}]^+$ : Calcd for  $\text{C}_{15}\text{H}_{11}\text{N}_2\text{O}_2$ : 251.0821. Found: 251.0812.

### 2-Diazo-1-phenylbutane-1,3-dione (1l):

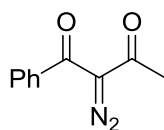

The title compound was prepared according to Method B. The product was obtained as white solid. mp: 55 - 56 °C. Yield: 88%. <sup>1</sup>H NMR (400 MHz, CDCl<sub>3</sub>) δ 7.66 - 7.63 (m, 2H), 7.59 - 7.50 (m, 1H), 7.48 - 7.47 (m, 2H), 2.58 (s, 3H); <sup>13</sup>C NMR (100 MHz, CDCl<sub>3</sub>) δ 190.8, 185.1, 137.3, 132.7, 128.9, 127.4, 29.2; HRMS (ESI) m/z [M+H]<sup>+</sup>: Calcd for C<sub>10</sub>H<sub>9</sub>N<sub>2</sub>O<sub>2</sub>: 189.0664. Found: 189.0660.

### 2-Diazocyclohexane-1,3-dione (1m):

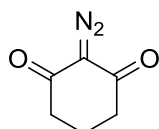

The title compound was prepared according to Method B. The product was obtained as yellow solid. mp: 46 - 48 °C. Yield: 85%. <sup>1</sup>H NMR (400 MHz, CDCl<sub>3</sub>) δ 2.57 (t, *J* = 6.4 Hz, 4H), 2.09 - 2.02 (m, 2H); <sup>13</sup>C NMR (100 MHz, CDCl<sub>3</sub>) δ 190.4, 36.8, 18.6; HRMS (ESI) m/z [M+H]<sup>+</sup>: Calcd for C<sub>6</sub>H<sub>7</sub>N<sub>2</sub>O<sub>2</sub>: 139.0508. Found: 139.0509.

### 1-Diazo-1-phenylpropan-2-one (1n):

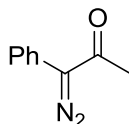

The title compound was prepared according to Method A. The product was obtained as orange solid. mp: 57 - 58 °C. Yield 74%; <sup>1</sup>H NMR (300 MHz, CDCl<sub>3</sub>) δ 7.51 - 7.43 (m, 2H), 7.41 - 7.38 (m, 2H), 7.26 - 7.25 (m, 1H), 2.37 (s, 3H); <sup>13</sup>C NMR (75 MHz, CDCl<sub>3</sub>) δ 162.5, 129.0, 126.9, 125.8, 125.5, 26.9; HRMS (ESI) m/z [M+Na]<sup>+</sup>: Calcd for C<sub>9</sub>H<sub>8</sub>N<sub>2</sub>ONa: 183.0534. Found: 183.0528.

### 2-Diazo-3-methyl-1-phenylbutan-1-one (1o):

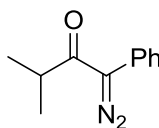



The title compound was prepared according to Method A. The product was obtained as red oil. Yield: 77%.  $^1\text{H}$  NMR (400 MHz,  $\text{CDCl}_3$ )  $\delta$  7.54 - 7.52 (m, 2H), 7.43 - 7.39 (m, 2H), 7.27 - 7.24 (m, 1H), 3.02 - 2.95 (m, 1H), 1.20 (d,  $J = 6.8$  Hz, 6H);  $^{13}\text{C}$  NMR (100 MHz,  $\text{CDCl}_3$ )  $\delta$  197.2, 130.3, 129.0, 126.9, 126.0, 36.5, 18.9; HRMS (ESI)  $m/z$   $[\text{M}+\text{H}]^+$ : Calcd for  $\text{C}_{11}\text{H}_{13}\text{N}_2\text{O}$ : 189.1028. Found: 189.1023.

### 2-Diazo-1,2-diphenylethanone (1p):

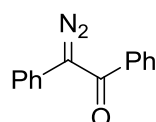

The title compound was prepared according to Method A. The product was obtained as red solid. mp: 78 - 79 °C. Yield 63%;  $^1\text{H}$  NMR (400 MHz,  $\text{CDCl}_3$ )  $\delta$  7.62 - 7.60 (m, 2H), 7.52 - 7.43 (m, 3H), 7.42 - 7.38 (m, 4H), 7.28 - 7.16 (m, 1H);  $^{13}\text{C}$  NMR (100 MHz,  $\text{CDCl}_3$ )  $\delta$  188.4, 138.0, 131.7, 129.1, 128.5, 127.8, 127.0, 126.1, 126.1; HRMS (ESI)  $m/z$   $[\text{M}+\text{H}]^+$ : Calcd for  $\text{C}_{14}\text{H}_{11}\text{N}_2\text{O}$ : 223.0871. Found: 223.0878.

### 2-Diazo-1-(furan-2-yl)-2-phenylethanone (1q):

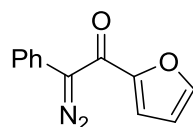

The title compound was prepared according to Method A. The product was obtained as yellow solid. mp: 109 - 110 °C. Yield: 88%.  $^1\text{H}$  NMR (400 MHz,  $\text{CDCl}_3$ )  $\delta$  7.60 - 7.60 (m, 2H), 7.58 (d,  $J = 0.8$  Hz, 1H), 7.52 - 7.52 (m, 2H), 7.46 - 7.42 (m, 1H), 6.49 (d,  $J = 1.6$  Hz, 1H), 6.41 (d,  $J = 2.0$  Hz, 1H);  $^{13}\text{C}$  NMR (100 MHz,  $\text{CDCl}_3$ )  $\delta$  173.5, 152.4, 144.4, 129.0, 127.2, 126.2, 125.9, 116.7, 112.2; HRMS (ESI)  $m/z$   $[\text{M}+\text{H}]^+$ : Calcd for  $\text{C}_{12}\text{H}_9\text{N}_2\text{O}_2$ : 213.0664. Found: 213.0665.

### 1-Diazo-3,4-dihydronaphthalen-2(1H)-one (1r):

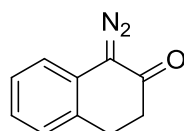

The title compound was prepared according to Method A. The product was obtained as red oil. Yield: 88%.  $^1\text{H}$  NMR (400 MHz,  $\text{CDCl}_3$ )  $\delta$  7.30 - 7.28 (m, 1H), 7.23 - 7.21 (m, 1H), 7.12 - 7.08 (m, 1H), 6.98 - 6.96 (m, 1H), 3.02 (t,  $J = 6.8$  Hz, 2H), 2.68 - 2.64 (m, 2H);  $^{13}\text{C}$  NMR (100 MHz,  $\text{CDCl}_3$ )  $\delta$  193.5, 131.3, 128.4, 127.5, 125.4, 124.5, 120.4, 36.9, 27.6; HRMS (ESI)  $m/z$   $[\text{M}+\text{H}]^+$ : Calcd for  $\text{C}_{10}\text{H}_9\text{N}_2\text{O}$ : 173.0715. Found: 173.0713.

**General procedure for the synthesis of 3-aminoalkenoate (2b - d):**

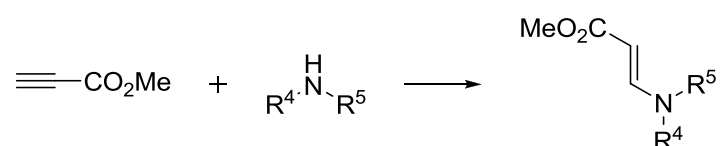

To a solution of methyl propiolate (5.0 mmol, 1.0 eq.) in THF (25 mL) was added amine (6.0 mmol, 1.2 eq.) at RT, and the reaction mixture was stirred overnight. Solvent was removed under reduced pressure, and crude compound was purified by column chromatography (hexane/ethyl acetate = 3:2).

**Methyl (E)-3-(dimethylamino) prop-2-enoate (2a):**

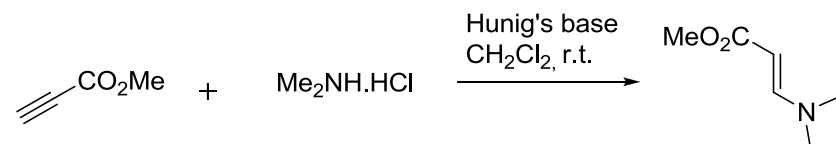

To a solution of methyl propiolate (5.0 mmol, 1.0 eq.) in CH<sub>2</sub>Cl<sub>2</sub> (50 mL) at RT was added dimethyl ammonium chloride (7.5 mmol, 1.5 eq.) and Hunig's base (7.5 mmol, 1.5 eq.) successively. Upon completion as indicated by TLC, the reaction was quenched with water, extracted with CH<sub>2</sub>Cl<sub>2</sub>, and dried over anhydrous Na<sub>2</sub>SO<sub>4</sub>. Solvent was removed under reduced pressure, and the crude material was purified by column chromatography (hexane/ethyl acetate = 3:2).

The product was obtained as yellow solid. mp: 50 - 51 °C. Yield 92%;  $^1\text{H}$  NMR (400 MHz,  $\text{CDCl}_3$ )  $\delta$  7.44 (d,  $J = 12.9$  Hz, 1H), 4.52 (d,  $J = 12.9$  Hz, 1H), 3.66 (s, 3H), 2.88 (s, br, 6H).

**Methyl (E)-3-pyrrolidin-1-ylprop-2-enoate (2b):**

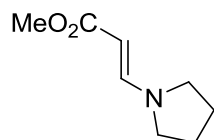

The title compound was prepared according to the general procedure. The product was obtained as yellow solid. mp: 72 - 73 °C. Yield 90%; <sup>1</sup>H NMR (400 MHz, CDCl<sub>3</sub>) δ 7.64 (d, *J* = 12.8 Hz, 1H), 4.47 (d, *J* = 12.8 Hz, 1H), 3.65 (s, 3H), 3.23 - 3.18 (m, 4H), 1.92 (s, 4H).

**(E)-methyl 3-(piperidin-1-yl)acrylate (2c):**

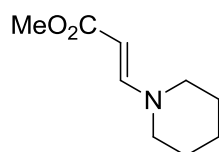

The title compound was prepared according to the general procedure. The product was obtained as yellow solid. mp: 40 - 41 °C. Yield 92%; <sup>1</sup>H NMR (300 MHz, CDCl<sub>3</sub>) δ 7.38 (d, *J* = 12.9 Hz, 1H), 4.61 (d, *J* = 13.2 Hz, 1H), 3.64 (s, 3H), 3.17 (m, 4H), 1.59 (m, 6H).

**(E)-Ethyl 3-(methyl(phenyl)amino)acrylate (2d):**

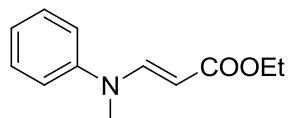

The title compound was prepared according to the general procedure. The product was obtained as yellow oil. Yield 86%; <sup>1</sup>H NMR (300 MHz, CDCl<sub>3</sub>) δ 7.94 (d, *J* = 13.2 Hz, 1H), 7.37 - 7.33 (m, 2H), 7.14 - 7.10 (m, 3H), 4.94 (d, *J* = 13.2 Hz, 1H), 4.18 (q, *J* = 7.2 Hz, 2H), 3.24 (s, 3H), 1.28 (t, *J* = 7.2 Hz, 3H).

**(E)-3-(dimethylamino)-1-phenylprop-2-en-1-one (2e):**

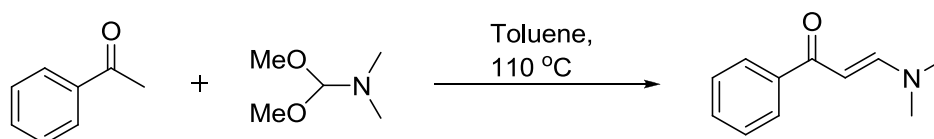

To a stirred solution of acetophenone (5.0 mmol, 1.0 eq.) in toluene (5.0 mL) was added 1,1-dimethoxy-N,N-dimethylmethanamine (7.0 mmol, 1.4 eq.), and the mixture was stirred at 110 °C. Upon completion as indicated by TLC, the reaction was quenched with water,

extracted with ethyl acetate, and dried over anhydrous  $\text{Na}_2\text{SO}_4$ . The solution was concentrated under reduced pressure, and the crude material was purified by column chromatography (hexane/ethyl acetate = 1:1). The product was obtained as yellow solid (500 mg). mp: 90 - 91 °C. Yield 57 %;  $^1\text{H}$  NMR (400 MHz,  $\text{CDCl}_3$ )  $\delta$  7.88 - 7.38 (m, 2H), 7.80 (d,  $J = 12.4$  Hz, 1H), 7.45 - 7.39 (m, 3H), 5.71 (d,  $J = 12.4$  Hz, 1H), 3.14 (s, 3H), 2.93 (s, 3H).

**General procedure for aminofurans (3aa - 3la, 3bb - 3be):**

Cu(hfacac)<sub>2</sub>·H<sub>2</sub>O (0.012 mmol, 6 mol %) was dried under vacuum at RT until it turned gray white. To a stirred solution of enamine (0.20 mmol, 1.0 eq.) in dichloroethane (1.0 mL) at RT was added a solution of diazo compound (0.24 mmol, 1.2 eq.) in dichloroethane (1.0 mL) dropwise over 10 min. The reaction mixture was stirred under N<sub>2</sub> at 60 °C until the diazo compound was fully consumed (4 h). The reaction mixture was stirred for another 12 h with exposure to air through a needle until the intermediate was completely consumed as indicated by TLC. The reaction mixture was concentrated under reduced pressure, and the crude material was purified by column chromatography using hexane/ethyl acetate (9:1) to yield 2-aminofuran.

**Dimethyl 2-(dimethylamino)-5-methyl-furan-3,4-dicarboxylate (3ba):**

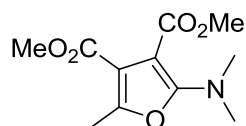

The title compound was prepared according to the general procedure. The product was obtained as colorless oil. Yield 74%; <sup>1</sup>H NMR (400 MHz, CDCl<sub>3</sub>) δ 3.79 (s, 3H), 3.71 (s, 3H), 2.99 (s, 6H), 2.29 (s, 3H); <sup>13</sup>C NMR (100 MHz, CDCl<sub>3</sub>) δ 164.8, 164.1, 159.8, 146.6, 114.5, 90.7, 51.7, 51.3, 40.7, 12.6; HRMS (ESI) m/z [M+H]<sup>+</sup>: Calcd for C<sub>11</sub>H<sub>16</sub>NO<sub>5</sub>: 242.1028. Found: 242.1033.

**Dimethyl 2-methyl-5-pyrrolidin-1-yl-furan-3,4-dicarboxylate (3bb):**

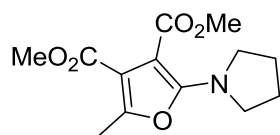

The title compound was prepared according to the general procedure. The product was obtained as colorless oil. Yield 54%; <sup>1</sup>H NMR (400 MHz, CDCl<sub>3</sub>) δ 3.82 (s, 3H), 3.73 (s, 3H), 3.53 - 3.50 (m, 4H), 2.30 (s, 3H), 1.94 - 1.91 (m, 4H); <sup>13</sup>C NMR (100 MHz, CDCl<sub>3</sub>) δ 165.0, 164.2, 157.7, 145.7, 114.6, 87.5, 51.7, 51.1, 49.4, 25.5, 12.5; HRMS (ESI) m/z [M+H]<sup>+</sup>: Calcd for C<sub>13</sub>H<sub>18</sub>NO<sub>5</sub>: 268.1185. Found: 268.1184.

**Dimethyl 2-methyl-5-(piperidin-1-yl)furan-3,4-dicarboxylate (3bc):**

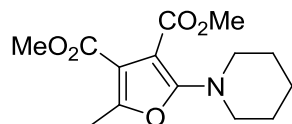

The title compound was prepared according to the general procedure. The product was obtained as colorless oil. Yield 57%; <sup>1</sup>H NMR (400 MHz, CDCl<sub>3</sub>) δ 3.82 (s, 3H), 3.75 (s, 3H), 3.38 - 3.35 (m, 4H), 2.33 (s, 3H), 1.67 - 1.60 (m, 6H); <sup>13</sup>C NMR (100 MHz, CDCl<sub>3</sub>) δ 164.8, 163.9, 159.9, 147.2, 114.3, 92.6, 51.7, 51.4, 50.1, 25.6, 24.1, 12.6; HRMS (ESI) m/z [M+H]<sup>+</sup>: Calcd for C<sub>14</sub>H<sub>20</sub>NO<sub>5</sub>: 282.1341. Found: 282.1344.

### 3-Ethyl 4-methyl 5-methyl-2-(methyl(phenyl)amino)furan-3,4-dicarboxylate (3bd):

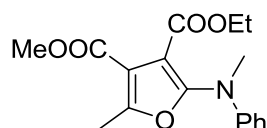

The title compound was prepared according to the general procedure. The product was obtained as colorless oil. Yield 72%; <sup>1</sup>H NMR (400 MHz, CDCl<sub>3</sub>) δ 7.26 - 7.21 (m, 2H), 6.91 - 6.88 (m, 1H), 6.80 - 6.77 (m, 2H), 4.08 (q, *J* = 7.2 Hz, 2H), 3.84 (s, 3H), 3.33 (s, 3H), 2.46 (s, 3H), 1.13 (t, *J* = 7.2 Hz, 3H); <sup>13</sup>C NMR (100 MHz, CDCl<sub>3</sub>) δ 163.8, 162.4, 153.8, 152.9, 146.5, 129.0, 120.5, 115.4, 113.6, 107.1, 60.7, 51.7, 39.0, 14.0, 13.3; HRMS (ESI) m/z [M+H]<sup>+</sup>: Calcd for C<sub>17</sub>H<sub>20</sub>NO<sub>5</sub>: 318.1341. Found: 318.1338.

### Ethyl 4-benzoyl-5-(dimethylamino)-2-methylfuran-3-carboxylate (3b'e):

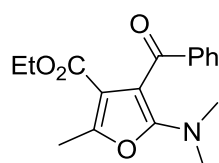

The title compound was prepared according to the general procedure. The product was obtained as colorless oil. Yield 62%; <sup>1</sup>H NMR (400 MHz, CDCl<sub>3</sub>) δ 7.83 - 7.80 (m, 2H), 7.49 - 7.41 (m, 1H), 7.39 - 7.37 (m, 2H), 3.71 (q, *J* = 7.2 Hz, 2H), 2.91 (s, 3H), 2.45 (s, 3H), 0.78 (t, *J* = 6.8 Hz, 3H); <sup>13</sup>C NMR (100 MHz, CDCl<sub>3</sub>) δ 190.2, 163.9, 157.9, 148.5, 140.7, 131.9, 128.8, 128.2, 115.2, 97.9, 60.1, 40.3, 13.4, 12.9; HRMS (ESI) m/z [M+H]<sup>+</sup>: Calcd for C<sub>17</sub>H<sub>20</sub>NO<sub>4</sub>: 302.1392. Found: 302.1396.

**Dimethyl 2-benzyl-5-(dimethylamino)furan-3,4-dicarboxylate (3ca):**

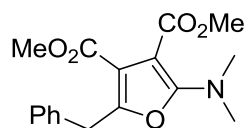

The title compound was prepared according to the general procedure. The product was obtained as colorless oil. Yield 68%;  $^1\text{H}$  NMR (400 MHz,  $\text{CDCl}_3$ )  $\delta$  7.29 - 7.22 (m, 5H), 4.01 (s, 2H), 3.83 (s, 3H), 3.74 (s, 3H), 2.99 (s, 6H);  $^{13}\text{C}$  NMR (100 MHz,  $\text{CDCl}_3$ )  $\delta$  164.7, 164.1, 160.1, 147.4, 137.2, 128.6, 128.5, 126.6, 115.3, 90.2, 51.9, 51.4, 40.5, 32.8; HRMS (ESI)  $m/z$   $[\text{M}+\text{H}]^+$ : Calcd for  $\text{C}_{17}\text{H}_{20}\text{NO}_5$ : 318.1341. Found: 318.1345.

**Dimethyl 2-(dimethylamino)-5-phenethylfuran-3,4-dicarboxylate (3da):**

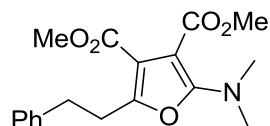

The title compound was prepared according to the general procedure. The product was obtained as yellow oil. Yield 71%;  $^1\text{H}$  NMR (400 MHz,  $\text{CDCl}_3$ )  $\delta$  7.29 - 7.25 (m, 2H), 7.21 - 7.15 (m, 3H), 3.77 (s, 3H), 3.74 (s, 3H), 3.02 - 2.99 (m, 2H), 2.98 (s, 6H), 2.92 - 2.88 (m, 2H);  $^{13}\text{C}$  NMR (100 MHz,  $\text{CDCl}_3$ )  $\delta$  164.6, 164.1, 159.8, 149.1, 140.7, 128.4, 128.4, 126.1, 114.8, 90.5, 51.7, 51.3, 40.6, 34.4, 28.7; HRMS (ESI)  $m/z$   $[\text{M}+\text{H}]^+$ : Calcd for  $\text{C}_{18}\text{H}_{22}\text{NO}_5$ : 332.1498. Found: 332.1493.

**Dimethyl 2-cyclohexyl-5-(dimethylamino)furan-3,4-dicarboxylate (3ea):**

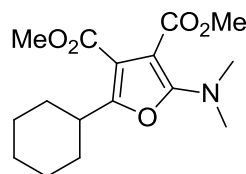

The title compound was prepared according to the general procedure. The product was obtained as colorless oil. Yield 68%;  $^1\text{H}$  NMR (400 MHz,  $\text{CDCl}_3$ )  $\delta$  3.81 (s, 3H), 3.72 (s, 3H), 3.02 (s, 6H), 2.90 - 2.82 (m, 1H), 1.82 - 1.64 (m, 5H), 1.52 - 1.36 (m, 5H);  $^{13}\text{C}$  NMR (100 MHz,  $\text{CDCl}_3$ )  $\delta$  165.2, 164.1, 159.6, 153.0, 112.8, 90.3, 51.8, 51.3, 40.6, 36.3, 31.0, 26.1, 25.8; HRMS (ESI)  $m/z$   $[\text{M}+\text{H}]^+$ : Calcd for  $\text{C}_{16}\text{H}_{24}\text{NO}_5$ : 310.1654. Found: 310.1657.

**(E)-Dimethyl 2-(dimethylamino)-5-styrylfuran-3,4-dicarboxylate (3fa):**

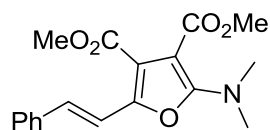

The title compound was prepared according to the general procedure. The product was obtained as colorless oil. Yield 76%;  $^1\text{H}$  NMR (400 MHz,  $\text{CDCl}_3$ )  $\delta$  7.47 (d,  $J = 7.2$  Hz, 2H), 7.34 (t,  $J = 7.6$  Hz, 2H), 7.26 - 7.23 (m, 1H), 7.13 (d,  $J = 16.0$  Hz, 1H), 6.94 (d,  $J = 16.0$  Hz, 1H), 3.88 (s, 3H), 3.77 (s, 3H), 3.14 (s, 6H);  $^{13}\text{C}$  NMR (100 MHz,  $\text{CDCl}_3$ )  $\delta$  164.3, 164.1, 159.5, 145.1, 136.7, 128.7, 128.4, 127.9, 126.6, 116.5, 114.1, 91.3, 52.0, 51.5, 40.4; HRMS (ESI)  $m/z$   $[\text{M}+\text{H}]^+$ : Calcd for  $\text{C}_{18}\text{H}_{20}\text{NO}_5$ : 330.1341. Found: 330.1343.

**4-Ethyl 3-methyl 2-(dimethylamino)-5-phenylfuran-3,4-dicarboxylate (3aa):**

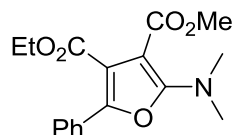

The title compound was prepared according to the general procedure. The product was obtained as colorless oil. Yield 72%;  $^1\text{H}$  NMR (400 MHz,  $\text{CDCl}_3$ )  $\delta$  7.57 (d,  $J = 7.2$  Hz, 2H), 7.36 (t,  $J = 7.6$  Hz, 2H), 7.27 (t,  $J = 8.8$  Hz, 1H), 4.36 (q,  $J = 7.2$  Hz, 2H), 3.75 (s, 3H), 3.17 (s, 6H), 1.35 (t,  $J = 7.2$  Hz, 3H);  $^{13}\text{C}$  NMR (100 MHz,  $\text{CDCl}_3$ )  $\delta$  165.7, 163.1, 160.8, 140.9, 129.2, 128.6, 127.8, 124.9, 116.0, 91.8, 61.6, 51.2, 40.7, 14.1; HRMS (ESI)  $m/z$   $[\text{M}+\text{H}]^+$ : Calcd for  $\text{C}_{17}\text{H}_{20}\text{NO}_5$ : 318.1341. Found: 318.1342.

**Dimethyl 2-(dimethylamino)-5-(4-methoxyphenyl)furan-3,4-dicarboxylate (3ga):**

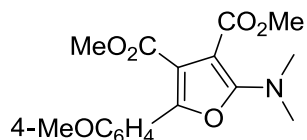

The title compound was prepared according to the general procedure. The product was obtained as colorless oil. Yield 62%;  $^1\text{H}$  NMR (400 MHz,  $\text{CDCl}_3$ )  $\delta$  7.53 - 7.50 (m, 2H), 6.91 - 6.89 (m, 2H), 3.86 (s, 3H), 3.82 (s, 3H), 3.75 (s, 3H), 3.15 (s, 6H);  $^{13}\text{C}$  NMR (100 MHz,  $\text{CDCl}_3$ )  $\delta$  166.2, 163.2, 160.5, 159.4, 141.9, 126.8, 121.9, 114.1, 114.0, 91.7, 55.3, 52.4, 51.3, 40.7; HRMS (ESI)  $m/z$   $[\text{M}+\text{H}]^+$ : Calcd for  $\text{C}_{17}\text{H}_{20}\text{NO}_6$ : 334.1291. Found: 334.1291.



**4-Ethyl 3-methyl 2-(dimethylamino)-5-(4-nitrophenyl)furan-3,4-dicarboxylate (3ha):**

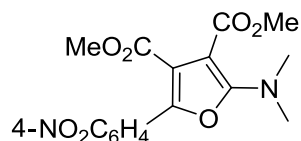

The title compound was prepared according to the general procedure. The product was obtained as colorless oil. Yield 72%;  $^1\text{H}$  NMR (400 MHz,  $\text{CDCl}_3$ )  $\delta$  8.22 - 8.19 (m, 2H), 7.66 - 7.64 (m, 2H), 4.41 (q,  $J = 7.2$  Hz, 2H), 3.77 (s, 3H), 3.22 (s, 6H), 1.38 (t,  $J = 7.2$  Hz, 3H);  $^{13}\text{C}$  NMR (100 MHz,  $\text{CDCl}_3$ )  $\delta$  165.2, 162.6, 161.1, 146.1, 137.8, 134.9, 124.3, 124.2, 120.5, 92.4, 62.1, 51.4, 40.6, 14.1; HRMS (ESI)  $m/z$   $[\text{M}+\text{H}]^+$ : Calcd for  $\text{C}_{17}\text{H}_{19}\text{N}_2\text{O}_7$ : 363.1192. Found: 363.1189.

**2,3-Diethyl 4-methyl 5-(dimethylamino)furan-2,3,4-tricarboxylate (3ia):**

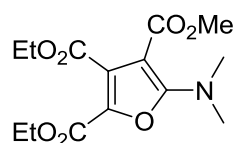

The title compound was prepared according to the general procedure. The product was obtained as colorless oil. Yield 60%;  $^1\text{H}$  NMR (400 MHz,  $\text{CDCl}_3$ )  $\delta$  4.38 (q,  $J = 9.6$  Hz, 2H), 4.28 (q,  $J = 9.2$  Hz, 2H), 3.73 (s, 3H), 3.20 (s, 6H), 1.39 (t,  $J = 9.2$  Hz, 3H), 1.31 (t,  $J = 9.2$  Hz, 3H);  $^{13}\text{C}$  NMR (100 MHz,  $\text{CDCl}_3$ )  $\delta$  163.8, 162.1, 161.8, 157.5, 129.9, 129.5, 91.5, 61.8, 60.9, 51.4, 40.5, 14.2, 14.2; HRMS (ESI)  $m/z$   $[\text{M}+\text{H}]^+$ : Calcd for  $\text{C}_{14}\text{H}_{20}\text{NO}_7$ : 314.1240. Found: 314.1239.

**Methyl 4-acetyl-2-(dimethylamino)-5-methylfuran-3-carboxylate (3ja):**

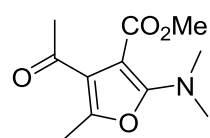

The title compound was prepared according to the general procedure. The product was obtained as colorless oil. Yield 64%;  $^1\text{H}$  NMR (400 MHz,  $\text{CDCl}_3$ )  $\delta$  3.73 (s, 3H), 3.08 (s, 6H), 2.36 (s, 3H), 2.24 (s, 3H);  $^{13}\text{C}$  NMR (100 MHz,  $\text{CDCl}_3$ )  $\delta$  197.9, 163.6, 161.4, 144.0,

124.2, 89.7, 50.9, 41.1, 30.8, 12.3; HRMS (ESI)  $m/z$   $[M+H]^+$ : Calcd for  $C_{11}H_{16}NO_4$ : 226.1079. Found: 226.1076.

**Methyl 4-benzoyl-2-(dimethylamino)-5-phenylfuran-3-carboxylate (3ka):**

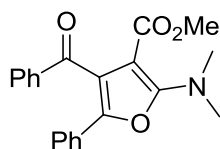

The title compound was prepared according to the general procedure. The product was obtained as colorless oil. Yield 52%;  $^1H$  NMR (400 MHz,  $CDCl_3$ )  $\delta$  7.95 - 7.93 (m, 2H), 7.55 - 7.51 (m, 1H), 7.45 - 7.41 (m, 4H), 7.26 - 7.23 (m, 2H), 7.19 - 7.17 (m, 1H), 3.32 (s, 3H), 3.24 (s, 6H);  $^{13}C$  NMR (100 MHz,  $CDCl_3$ )  $\delta$  193.2, 163.0, 160.9, 140.2, 137.8, 133.2, 129.2, 129.0, 128.6, 127.4, 124.5, 121.7, 93.0, 50.5, 40.6; HRMS (ESI)  $m/z$   $[M+H]^+$ : Calcd for  $C_{21}H_{20}NO_4$ : 350.1392. Found: 350.1401.

**3-Ethyl 4-methyl 5-methyl-2-(methyl(phenyl)amino)furan-3,4-dicarboxylate (3la):**

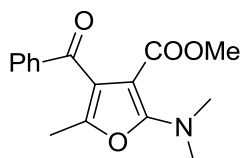

The title compound was prepared according to the general procedure. The product was obtained as yellow oil. Yield 60%;  $^1H$  NMR (400 MHz,  $CDCl_3$ )  $\delta$  7.85 - 7.83 (m, 2H), 7.53 - 7.49 (m, 1H), 7.44 - 7.40 (m, 2H), 3.19 (s, 3H), 3.13 (s, 6H), 2.20 (s, 3H);  $^{13}C$  NMR (100 MHz,  $CDCl_3$ )  $\delta$  192.1, 163.3, 160.7, 143.6, 138.9, 132.5, 128.7, 128.3, 121.7, 91.1, 50.3, 40.7, 12.1; HRMS (ESI)  $m/z$   $[M+H]^+$ : Calcd for  $C_{16}H_{18}NO_4$ : 288.1236. Found: 288.1235.

### General procedures for 2-unsubstituted furans:

Cu(hfacac)<sub>2</sub>·H<sub>2</sub>O (0.012 mmol, 6 mol %) was dried under vacuum at RT until it turned gray white. To a solution of enamine (0.20 mmol, 1.0 eq.) in dichloroethane (1.0 mL) at RT was added a solution of diazo compound (0.24 mmol, 1.2 eq.) in dichloroethane (1.0 mL) dropwise over 10 min.

Method A: The reaction mixture was stirred at RT for 4 h under N<sub>2</sub> (**4re** for overnight) until the diazo compound was fully consumed. The reaction mixture was concentrated under reduced pressure, and the crude material was purified by column chromatography using hexane/ethyl acetate (19:1) to give 2-unsubstituted furan.

Method B: The reaction mixture was heated at 60 °C under N<sub>2</sub> until the diazo compound is fully consumed. Solvent was removed under reduced pressure, and the crude mixture was dissolved in THF (2.5 mL). The solution was treated with *p*-Toluenesulfonic acid (0.40 mmol, 2.0 eq.) and heated at 60 °C under N<sub>2</sub> overnight. The reaction mixture was concentrated under reduced pressure, and the crude material was purified by column chromatography using hexane/ethyl acetate (19:1) to give 2-unsubstituted furan.

### Methyl 4-acetyl-5-methyl-furan-3-carboxylate (**4ja**):

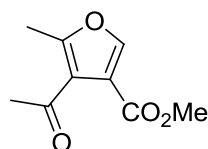

The title compound was prepared according to Method B. The product was obtained as colorless oil. Yield 62%; <sup>1</sup>H NMR (400 MHz, CDCl<sub>3</sub>) δ 7.79 (s, 1H), 3.84 (s, 3H), 2.53 (s, 3H), 2.44 (s, 3H); <sup>13</sup>C NMR (100 MHz, CDCl<sub>3</sub>) δ 196.5, 163.0, 158.1, 146.4, 121.6, 117.8, 51.9, 31.2, 13.5; HRMS (ESI) m/z [M+H]<sup>+</sup>: Calcd for C<sub>9</sub>H<sub>11</sub>O<sub>4</sub>: 183.0657. Found: 183.0661.

### 1-(4-Benzoyl-2-methylfuran-3-yl)ethanone (**4je**):

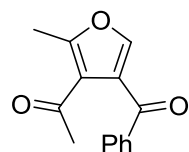

The title compound was prepared according to Method B. The product was obtained as colorless oil. Yield 71%; <sup>1</sup>H NMR (400 MHz, CDCl<sub>3</sub>) δ 7.92 - 7.90 (m, 2H), 7.64 - 7.60 (m,

1H), 7.52 (s, 1H), 7.50 - 7.44 (m, 2H), 2.55 (s, 3H), 2.36 (s, 3H); <sup>13</sup>C NMR (100 MHz, CDCl<sub>3</sub>) δ 195.5, 189.5, 158.8, 145.3, 138.2, 133.3, 129.4, 128.7, 125.9, 122.3, 30.7, 13.8; HRMS (ESI) m/z [M+H]<sup>+</sup>: Calcd for C<sub>13</sub>H<sub>13</sub>O<sub>3</sub>: 217.0865. Found: 217.0860.

**3-Benzoyl-6,7-dihydrobenzofuran-4(5H)-one (4me):**

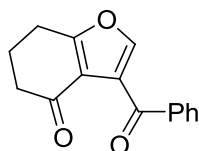

The title compound was obtained without acid treatment at 80 °C. The product was obtained as yellow oil. Yield 68%; <sup>1</sup>H NMR (400 MHz, CDCl<sub>3</sub>) δ 7.91 - 7.88 (m, 2H), 7.66 (s, 1H), 7.60 - 7.58 (m, 1H), 7.49 - 7.45 (m, 2H), 2.98 (t, *J* = 6.4 Hz, 2H), 2.57 - 2.54 (m, 2H), 2.25 (t, *J* = 6.4 Hz, 2H); <sup>13</sup>C NMR (100 MHz, CDCl<sub>3</sub>) δ 192.3, 189.0, 167.9, 145.3, 137.8, 133.3, 129.6, 128.4, 123.8, 120.0, 38.2, 23.5, 22.3; HRMS (ESI) m/z [M+H]<sup>+</sup>: Calcd for C<sub>15</sub>H<sub>13</sub>O<sub>3</sub>: 241.0865. Found: 241.0862.

**Methyl 5-methyl-4-phenylfuran-3-carboxylate (4na):**

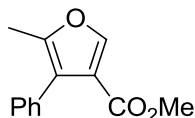

The title compound was prepared according to Method A. The product was obtained as colorless oil. Yield 56%; <sup>1</sup>H NMR (400 MHz, CDCl<sub>3</sub>) δ 7.95 (s, 1H), 7.41 - 7.37 (m, 2H), 7.35 - 7.30 (s, 3H), 3.72 (s, 3H), 2.28 (s, 3H); <sup>13</sup>C NMR (100 MHz, CDCl<sub>3</sub>) δ 163.6, 150.8, 146.7, 131.9, 130.0, 127.8, 127.2, 120.9, 118.4, 51.2, 12.1; HRMS (ESI) m/z [M+H]<sup>+</sup>: Calcd for C<sub>13</sub>H<sub>13</sub>O<sub>3</sub>: 217.0865. Found: 217.0860.

**(5-Methyl-4-phenylfuran-3-yl)(phenyl)methanone (4ne):**

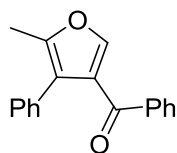

The title compound was prepared according to Method A. The product was obtained as colorless oil. Yield 48%; <sup>1</sup>H NMR (400 MHz, CDCl<sub>3</sub>) δ 7.83 - 7.82 (m, 2H), 7.72 (s, 1H), 7.52 - 7.51 (m, 1H), 7.42 - 7.39 (m, 2H), 7.35 - 7.32 (m, 2H), 7.28 - 7.26 (m, 3H), 2.37 (s, 3H); <sup>13</sup>C NMR (100 MHz, CDCl<sub>3</sub>) δ 189.9, 150.8, 146.9, 138.8, 132.5, 132.1, 129.6, 129.4, 128.3, 128.1, 127.0, 125.9, 121.5, 12.2; HRMS (ESI) m/z [M+H]<sup>+</sup>: Calcd for C<sub>18</sub>H<sub>15</sub>O<sub>2</sub>: 263.1072. Found: 263.1076.

**(5-Isopropyl-4-phenylfuran-3-yl)(phenyl)methanone (4oe):**

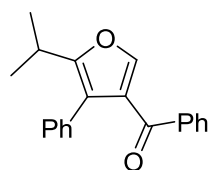

The title compound was prepared according to Method A. The product was obtained as colorless oil. Yield 62%;  $^1\text{H}$  NMR (400 MHz,  $\text{CDCl}_3$ )  $\delta$  7.84 - 7.82 (m, 2H), 7.73 (s, 1H), 7.54 - 7.50 (m, 1H), 7.42 - 7.38 (m, 2H), 7.35 - 7.32 (m, 2H), 7.31 - 7.24 (m, 3H), 3.13 - 3.06 (m, 1H), 1.28 (d,  $J = 6.8$  Hz, 6H);  $^{13}\text{C}$  NMR (100 MHz,  $\text{CDCl}_3$ )  $\delta$  189.9, 158.9, 147.0, 138.9, 132.5, 132.2, 129.8, 129.3, 128.3, 128.1, 127.0, 125.8, 119.7, 26.0, 21.5; HRMS (ESI)  $m/z$   $[\text{M}+\text{H}]^+$ : Calcd for  $\text{C}_{20}\text{H}_{19}\text{O}_2$ : 291.1385. Found: 291.1391.

**(4, 5-Diphenylfuran-3-yl)(phenyl)methanone (4pe):**

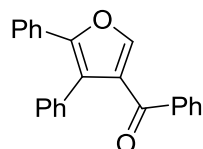

The title compound was prepared according to Method A. The product was obtained as colorless oil. Yield 59%;  $^1\text{H}$  NMR (400 MHz,  $\text{CDCl}_3$ )  $\delta$  7.87 (s, 1H), 7.85 - 7.84 (m, 2H), 7.53 - 7.25 (m, 13H);  $^{13}\text{C}$  NMR (100 MHz,  $\text{CDCl}_3$ )  $\delta$  189.6, 150.8, 147.1, 138.7, 132.7, 132.3, 130.1, 130.0, 129.4, 128.5, 128.4, 128.4, 128.1, 127.6, 127.5, 126.2, 122.1; HRMS (ESI)  $m/z$   $[\text{M}+\text{H}]^+$ : Calcd for  $\text{C}_{23}\text{H}_{17}\text{O}_2$ : 325.1229. Found: 325.1225.

**Methyl 3-phenyl-2,2'-bifuran-4-carboxylate (4qa):**

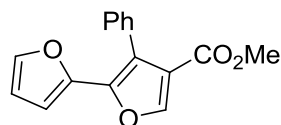

The title compound was prepared according to Method A. The product was obtained as colorless oil. Yield 61%;  $^1\text{H}$  NMR (400 MHz,  $\text{CDCl}_3$ )  $\delta$  8.07 (s, 1H), 7.42 - 7.37 (m, 5H), 7.36 - 7.36 (m, 1H), 6.33 (dd,  $J_1 = 3.2$  Hz,  $J_2 = 1.6$  Hz, 1H), 6.20 (dd,  $J_1 = 3.6$  Hz,  $J_2 = 1.6$  Hz, 1H), 3.72 (s, 3H);  $^{13}\text{C}$  NMR (100 MHz,  $\text{CDCl}_3$ )  $\delta$  163.0, 147.3, 144.8, 143.9, 142.4, 131.0, 130.2, 128.0, 127.9, 121.1, 119.9, 111.2, 107.8, 51.4; HRMS (ESI)  $m/z$   $[\text{M}+\text{H}]^+$ : Calcd for  $\text{C}_{16}\text{H}_{13}\text{O}_4$ : 269.0814. Found: 269.0813.

**Naphtho[2,1-b]furan-1-yl(phenyl)methanone (4re):**

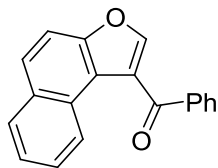

The title compound was prepared according to Method A. The product was obtained as yellow oil. Yield 62%;  $^1\text{H}$  NMR (400 MHz,  $\text{CDCl}_3$ )  $\delta$  8.90 - 8.88 (m, 1H), 8.04 - 7.95 (m, 4H), 7.88 - 7.86 (m, 1H), 7.72 - 7.51 (m, 6H);  $^{13}\text{C}$  NMR (100 MHz,  $\text{CDCl}_3$ )  $\delta$  190.9, 154.0, 151.4, 139.3, 133.0, 131.3, 129.8, 128.7, 128.6, 128.1, 127.9, 126.8, 126.2, 125.3, 123.9, 119.9, 112.1; HRMS (ESI)  $m/z$   $[\text{M}+\text{H}]^+$ : Calcd for  $\text{C}_{19}\text{H}_{13}\text{O}_2$ : 173.0916. Found: 273.0915.

### $^1\text{H}$ and $^{13}\text{C}$ NMR spectra of $\alpha$ -diazo compounds

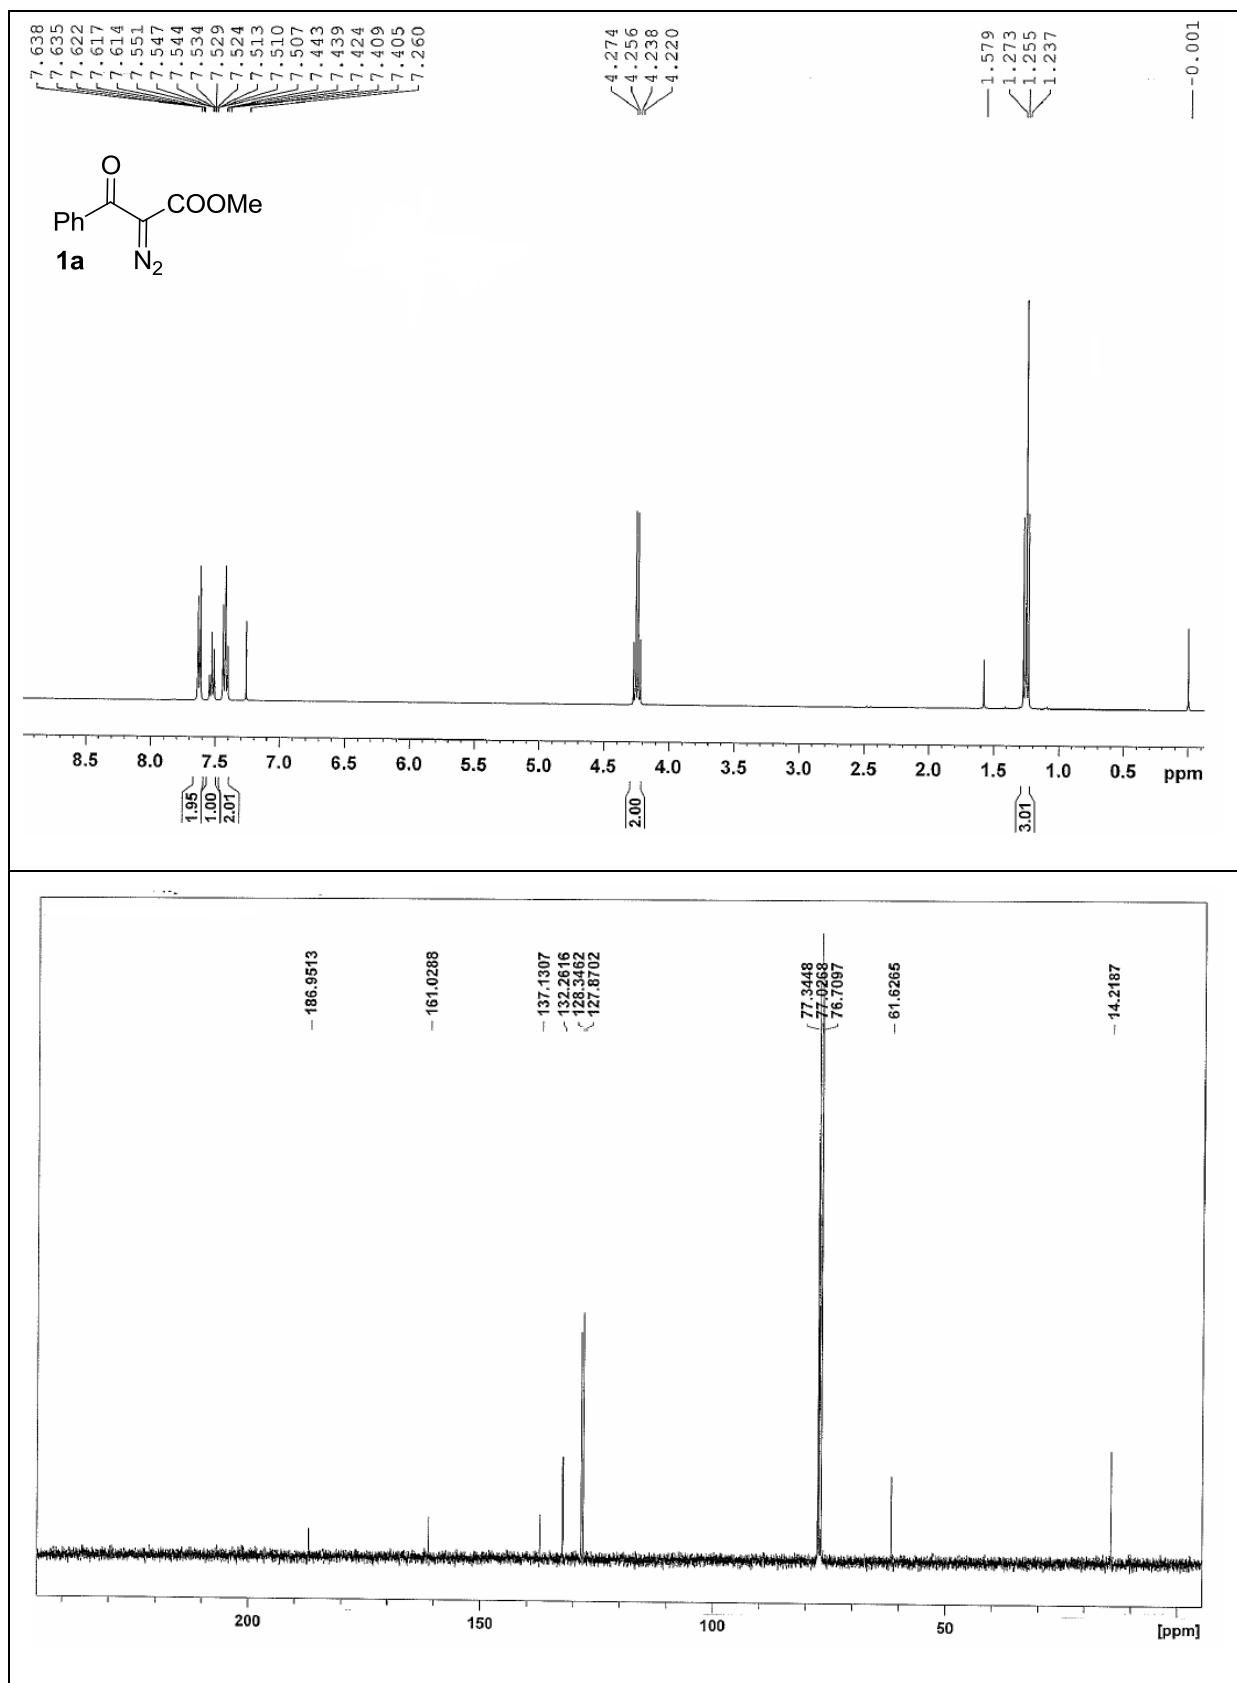

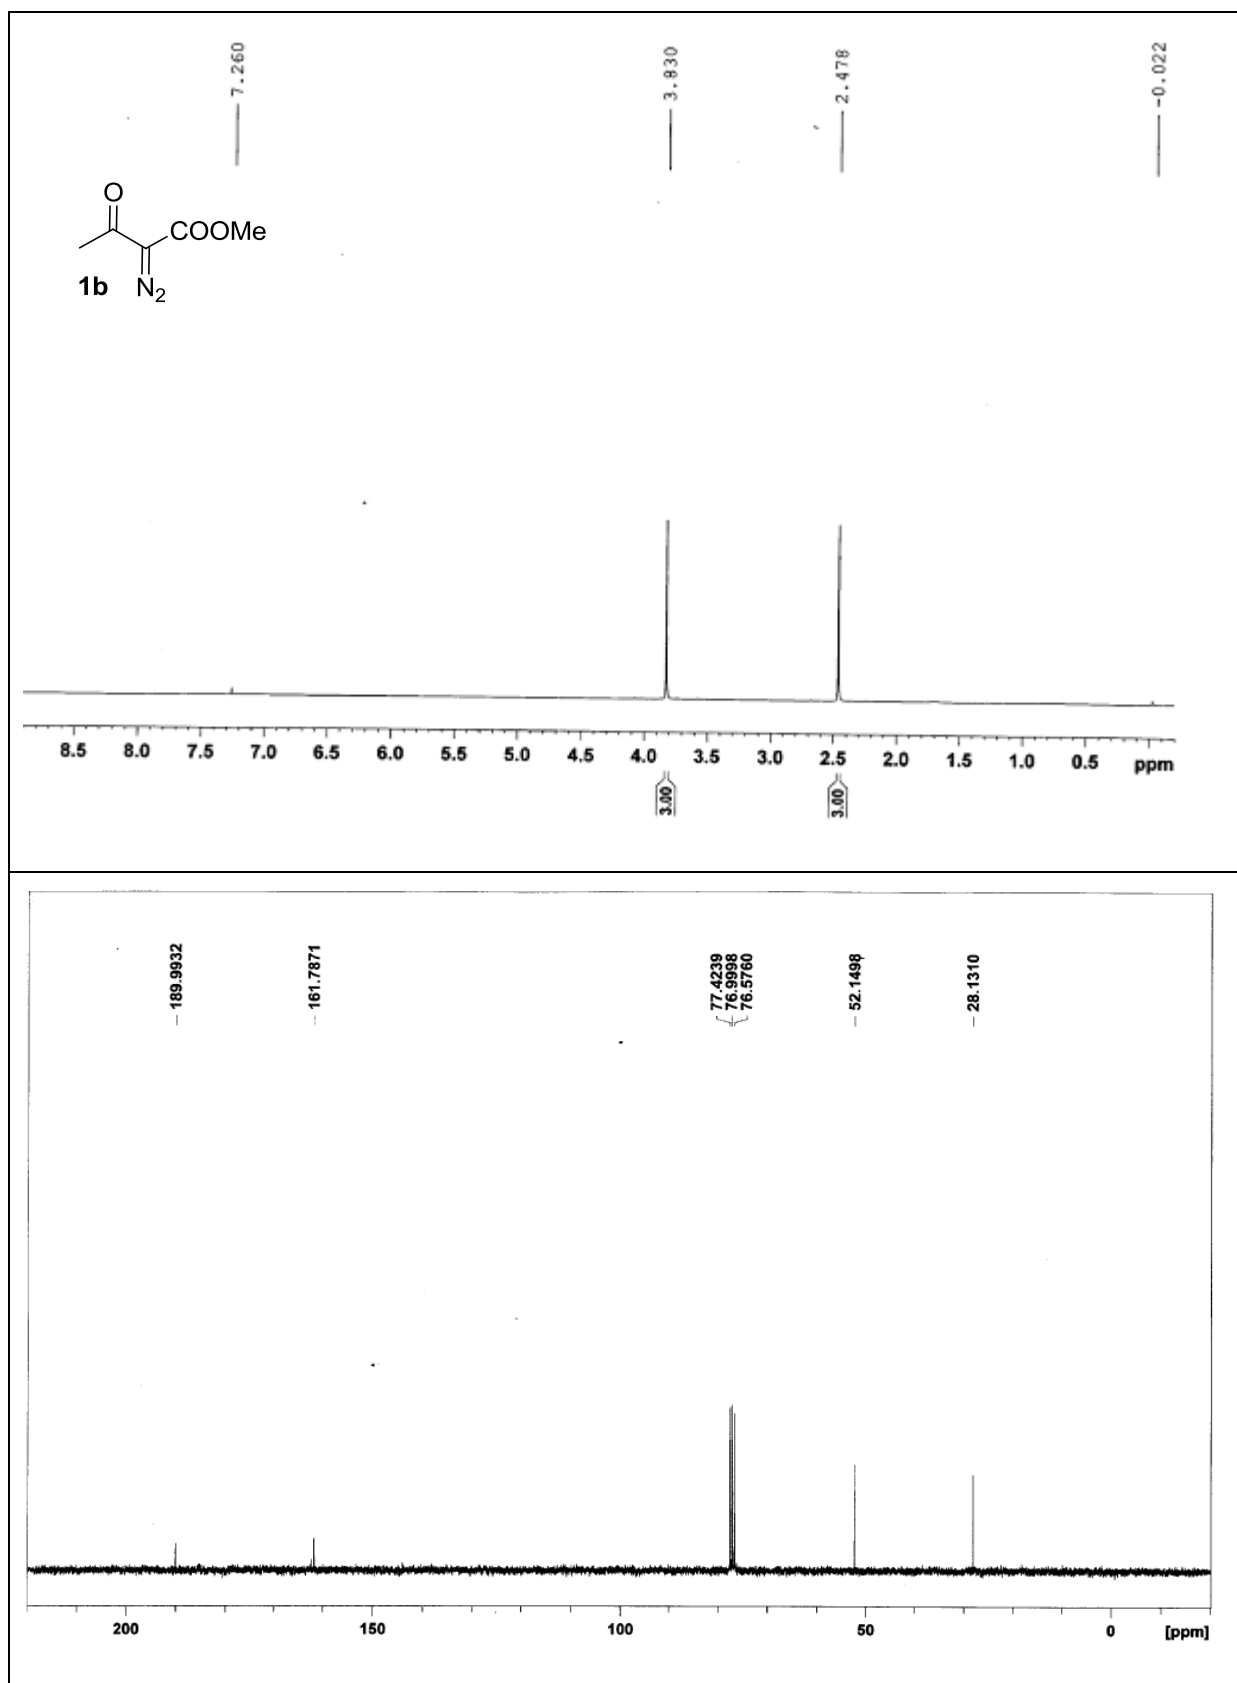



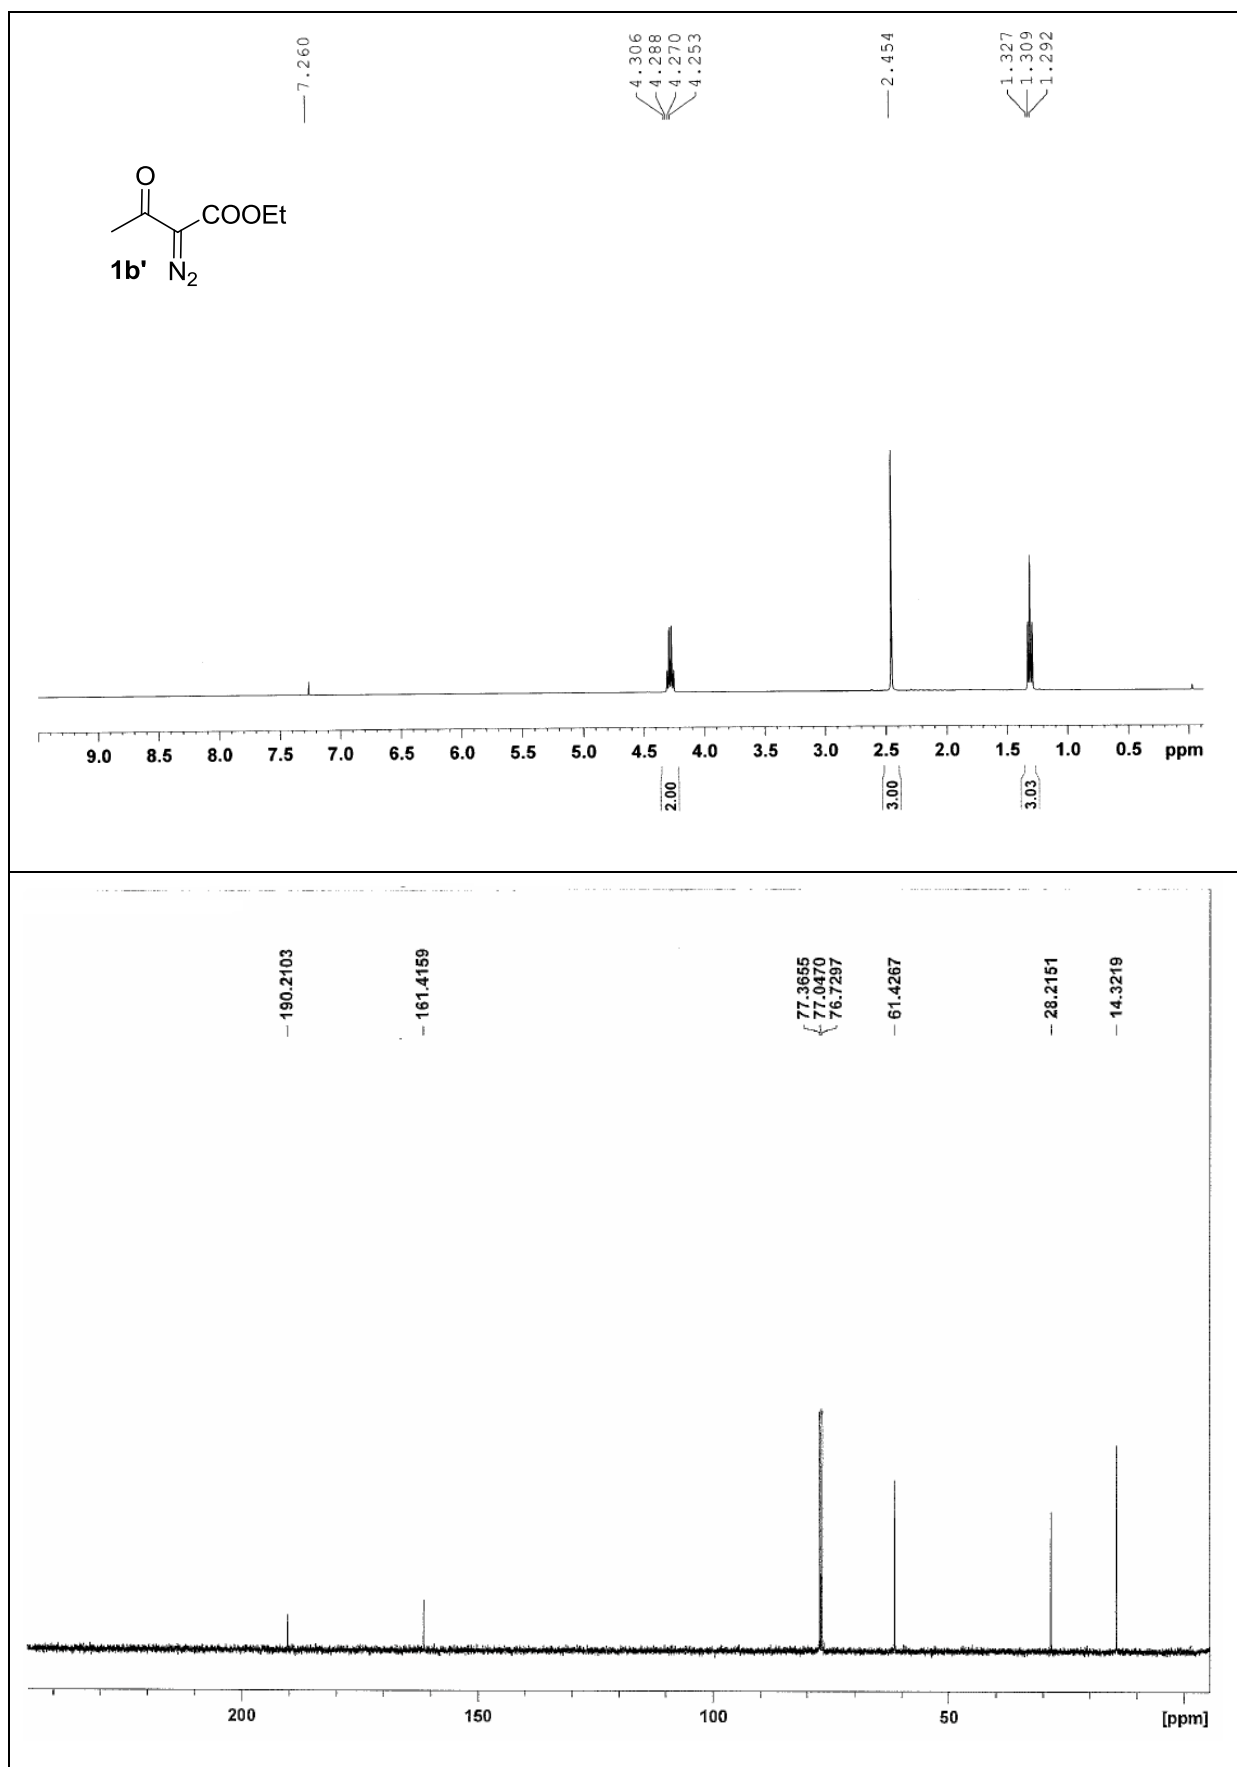

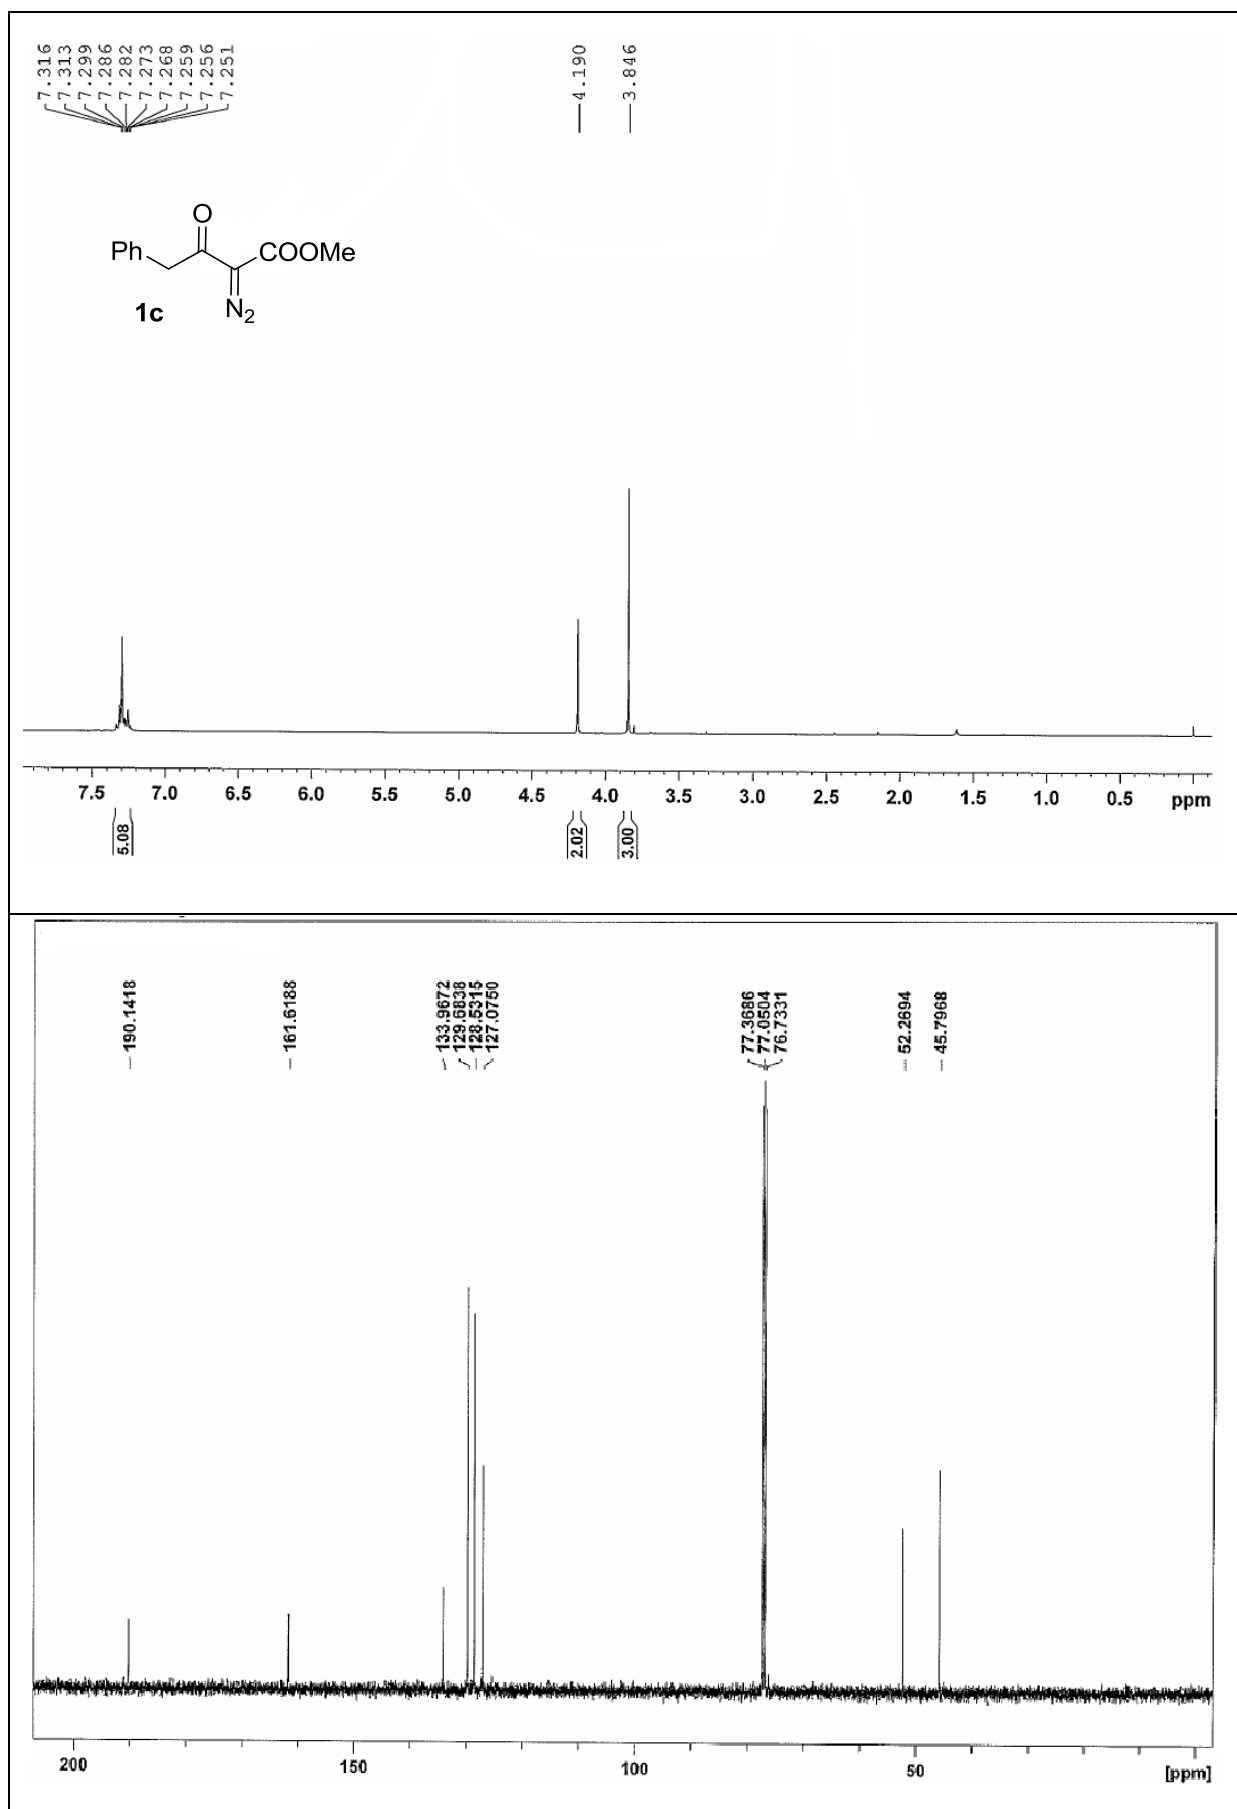

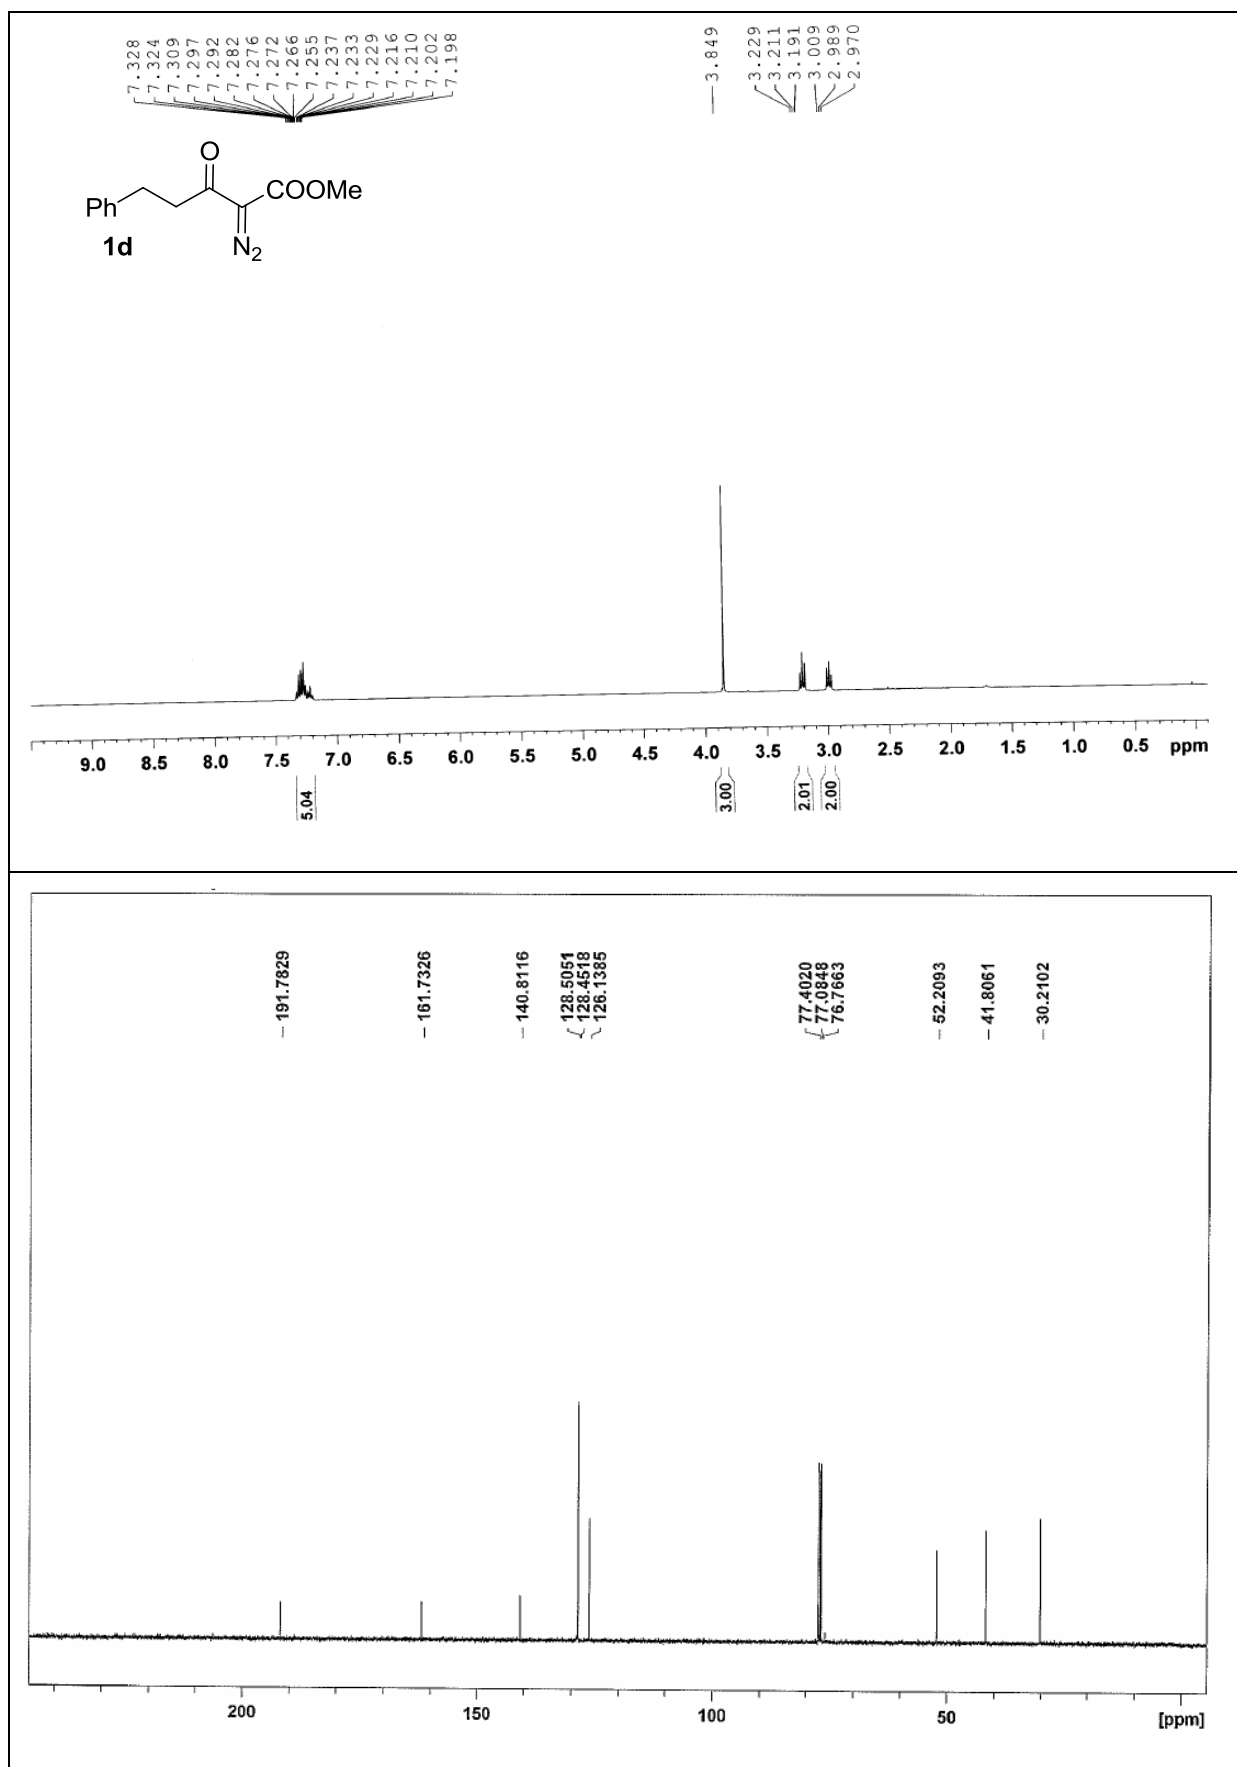

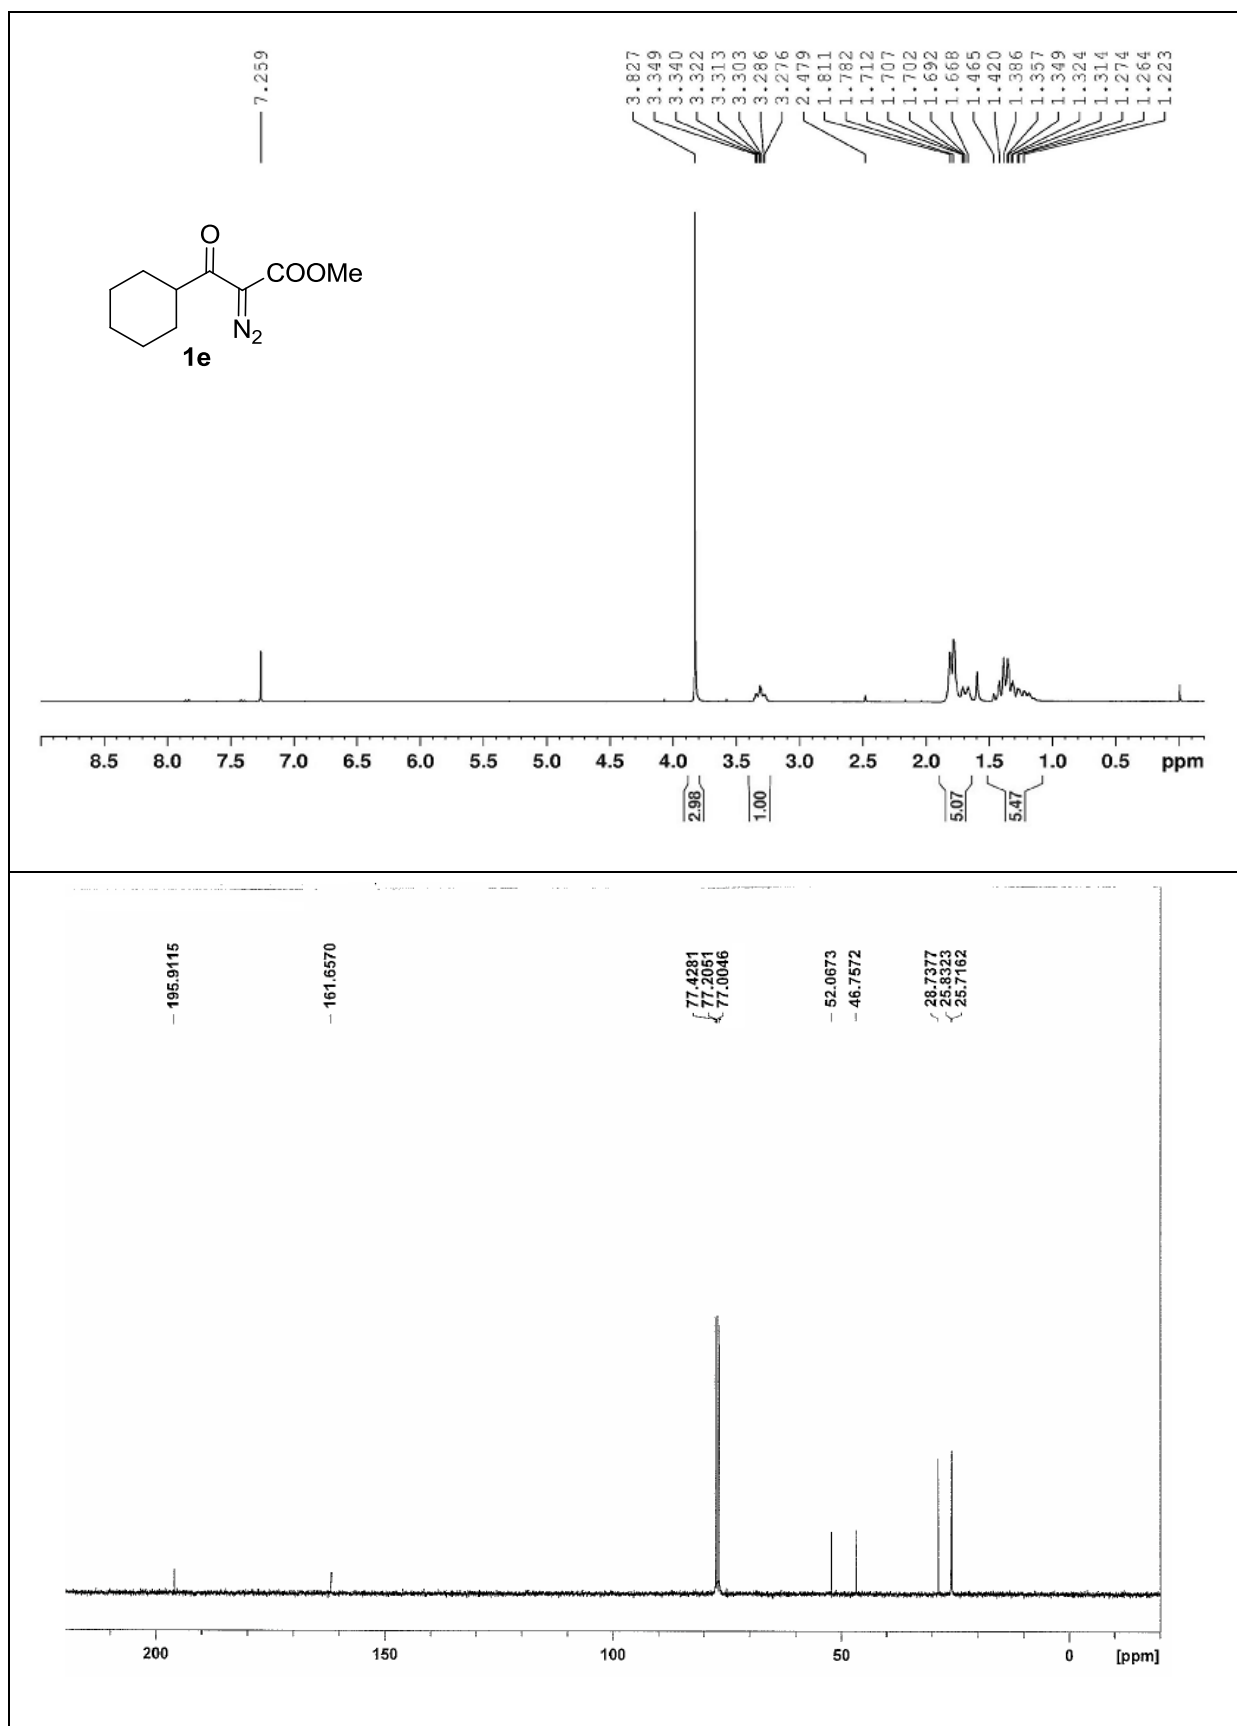

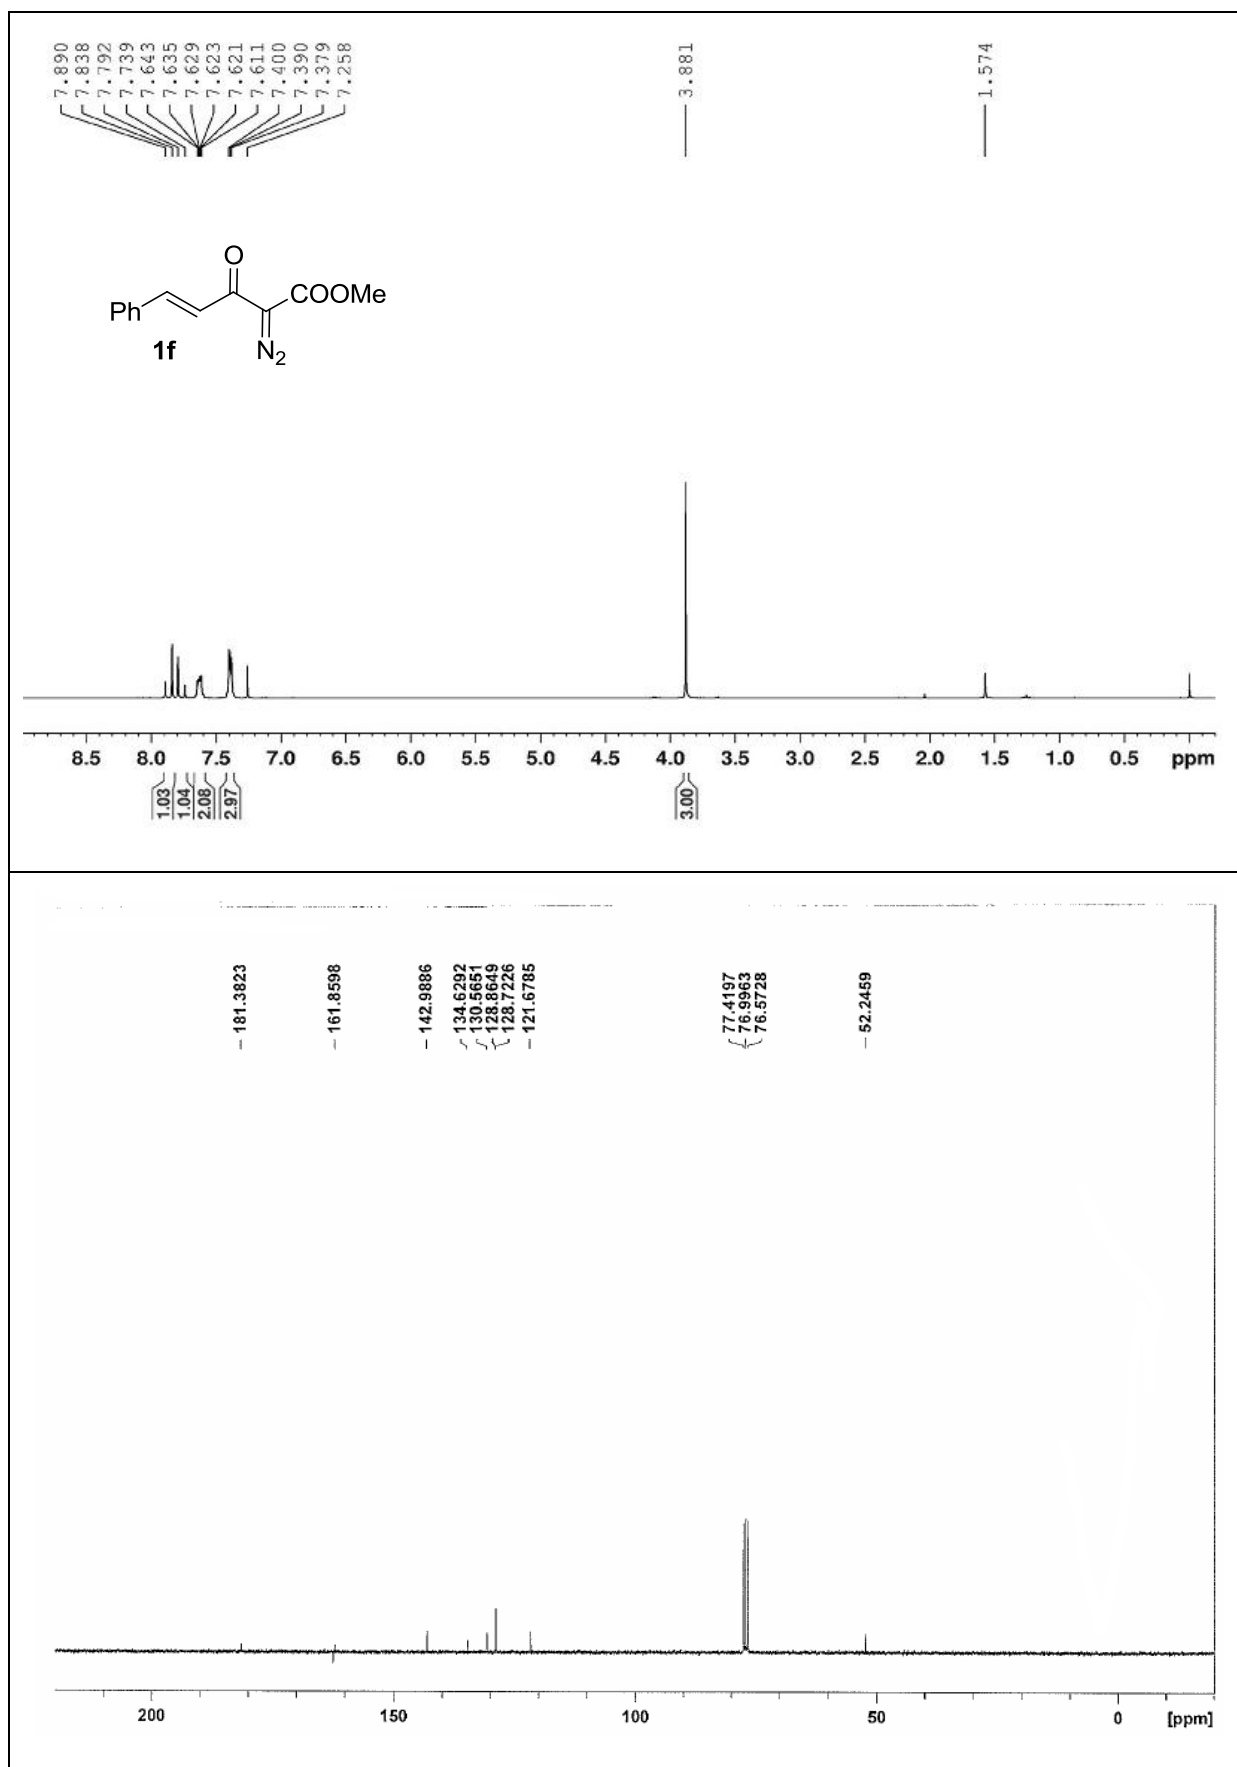

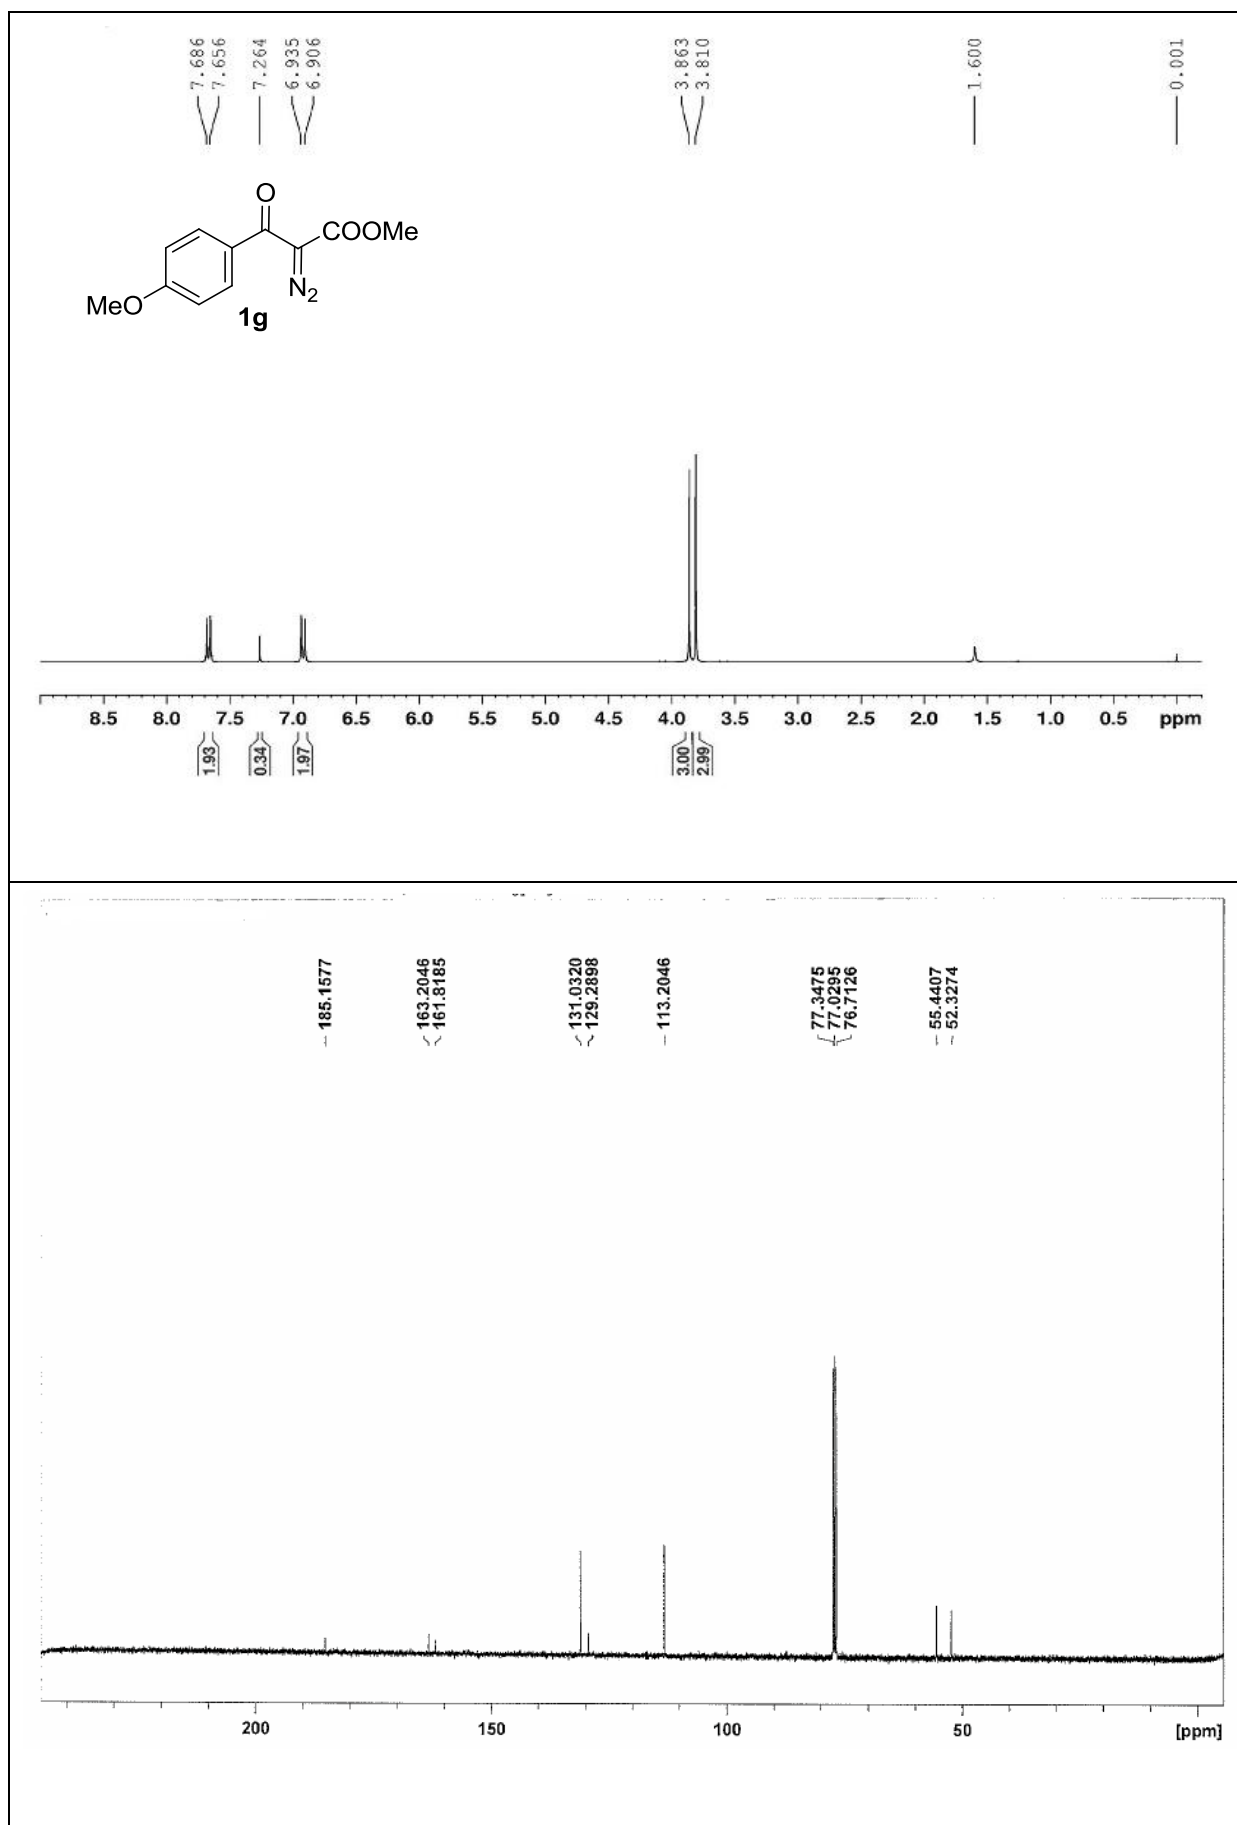

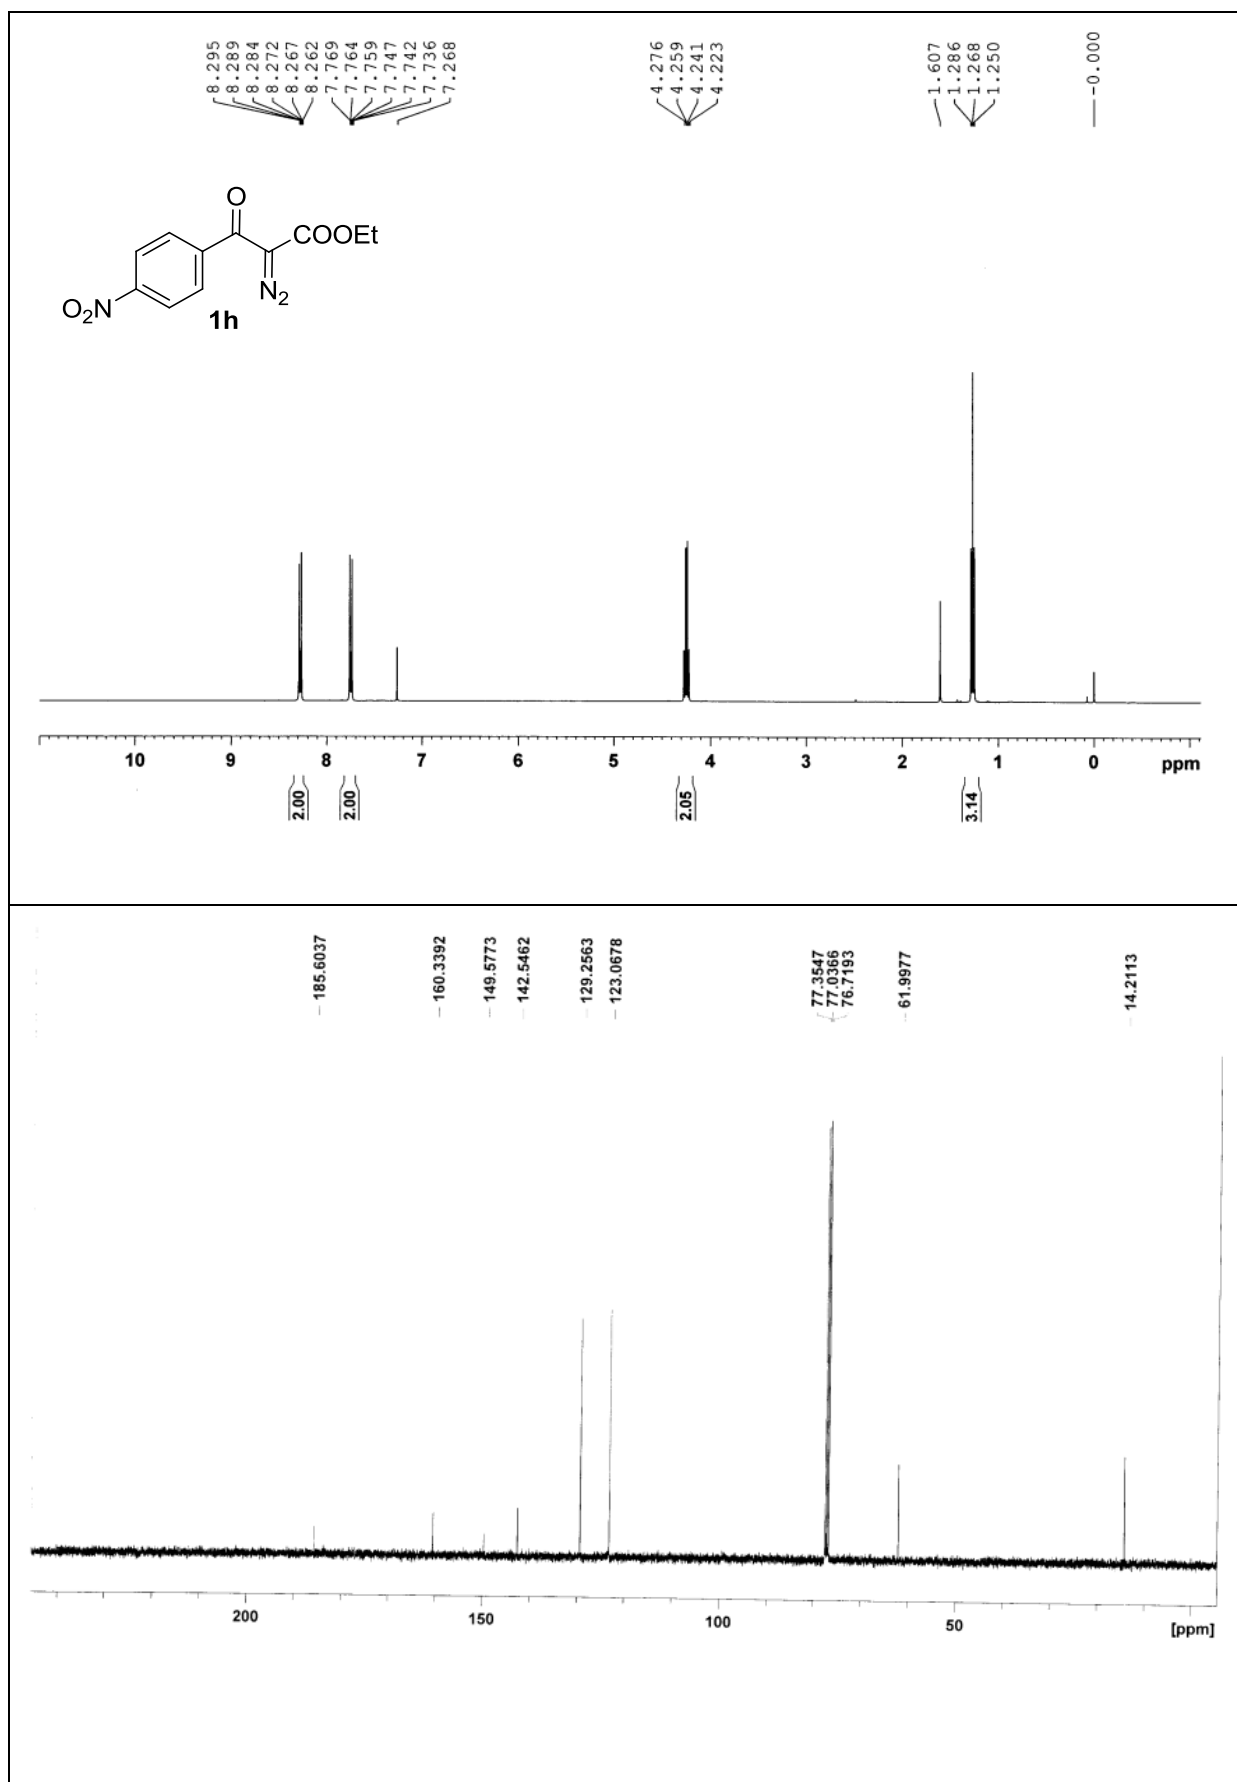

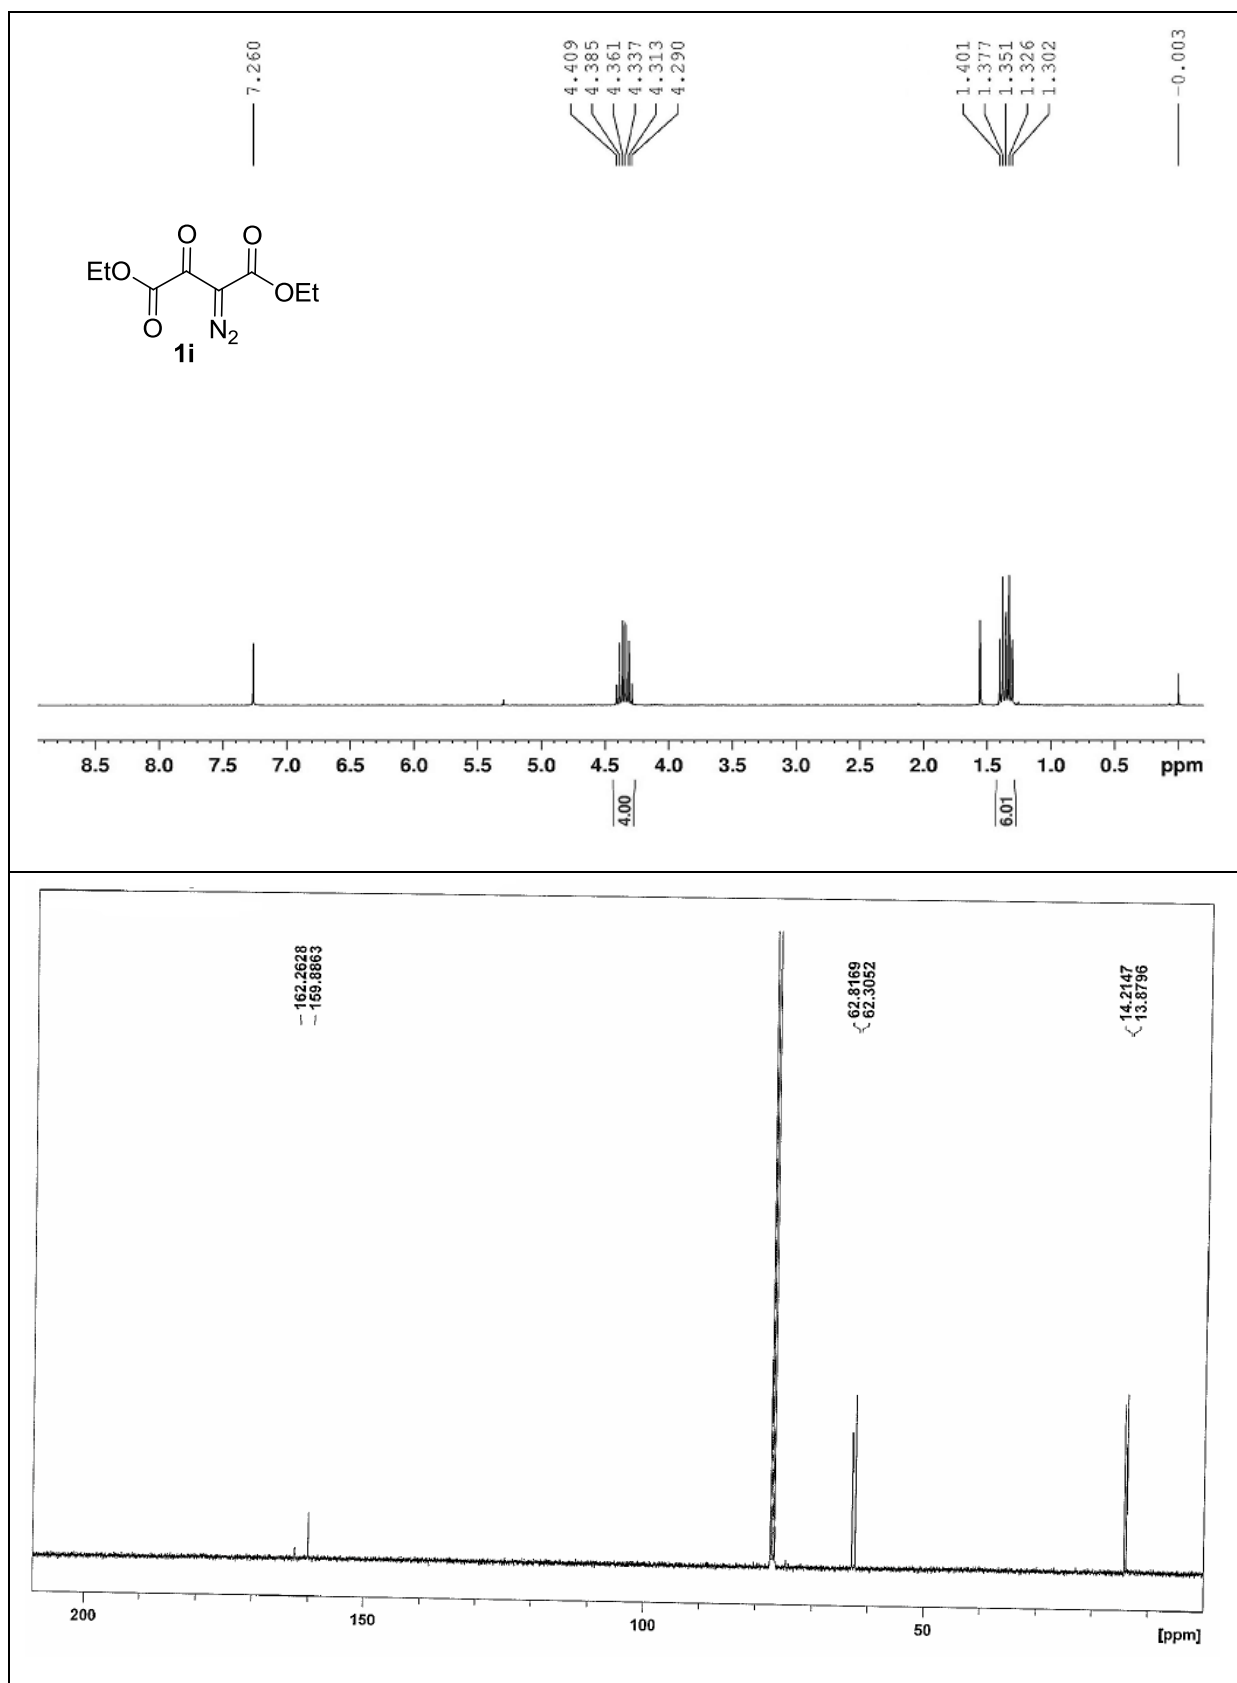



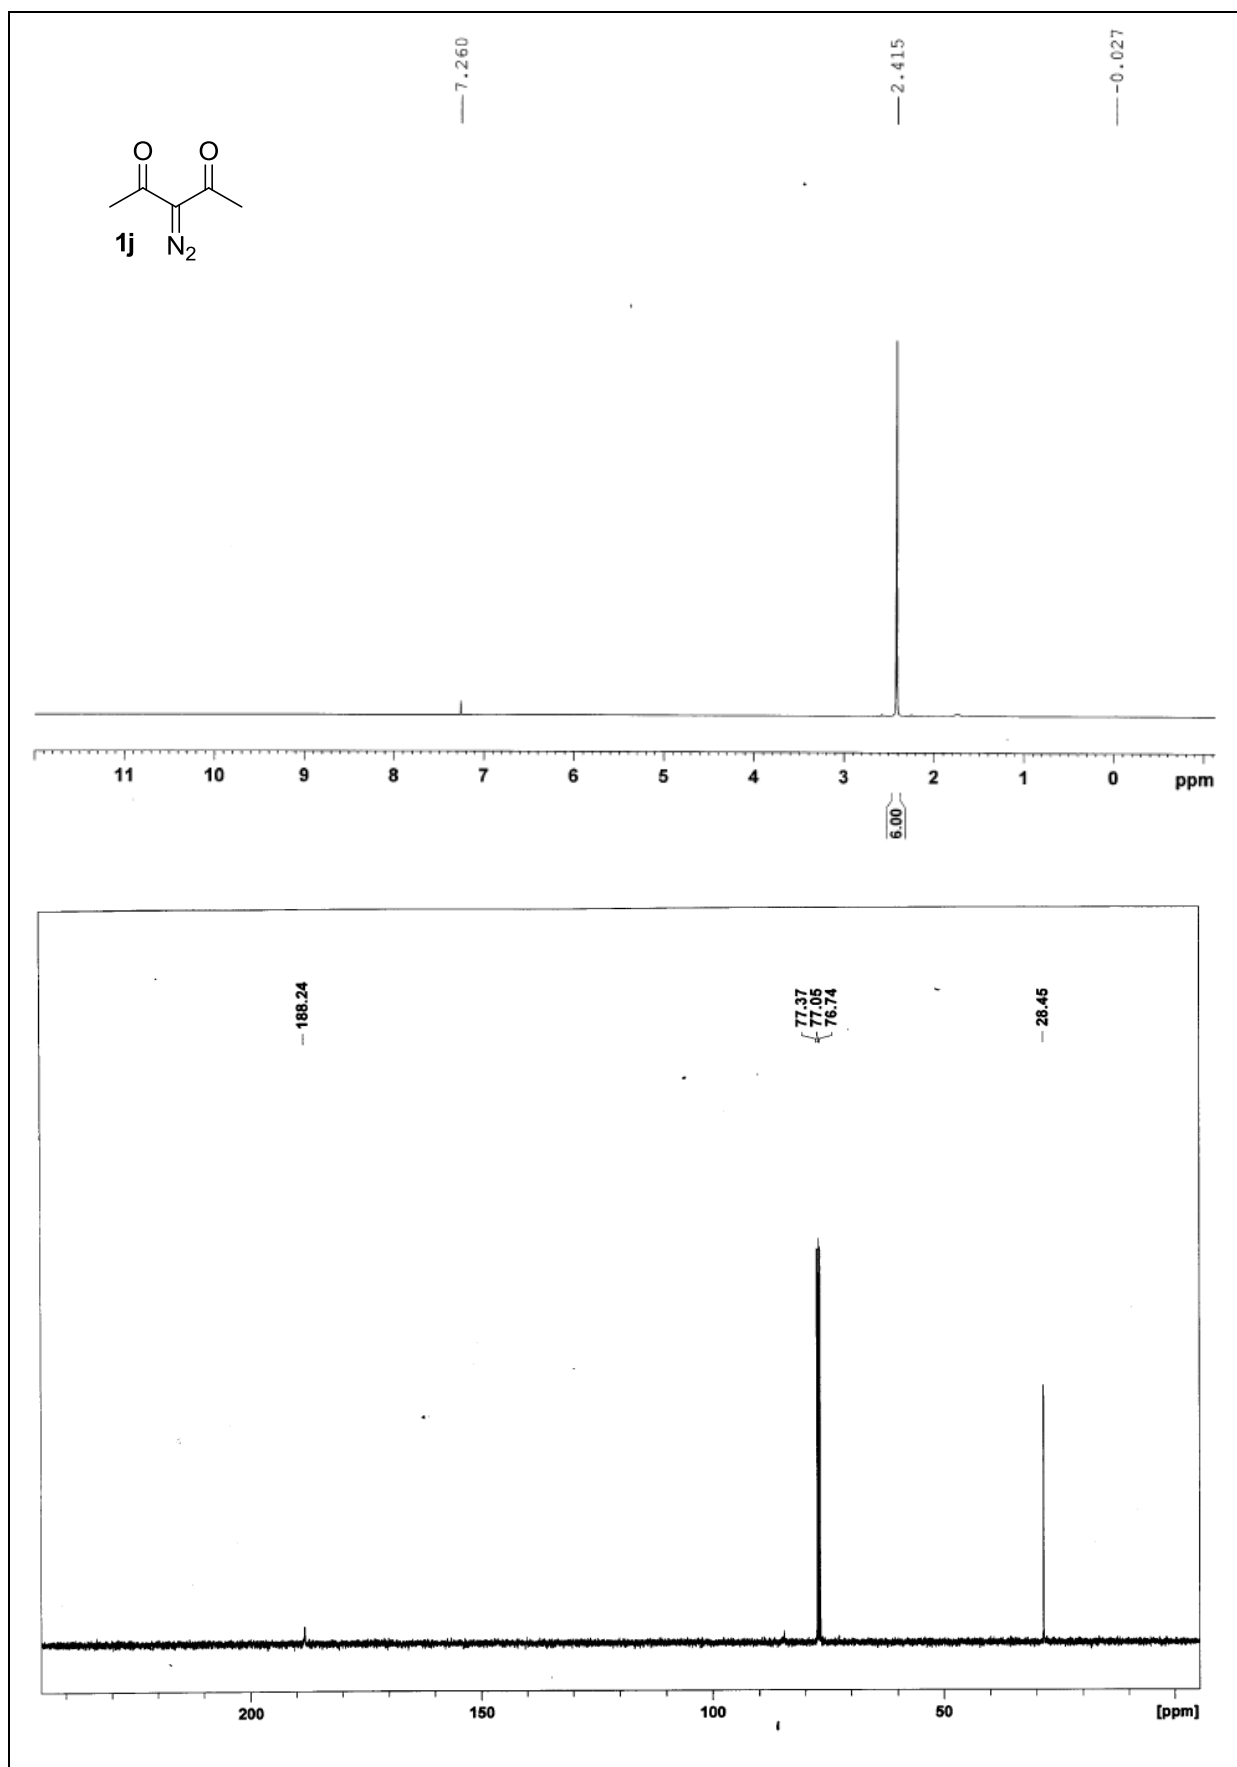

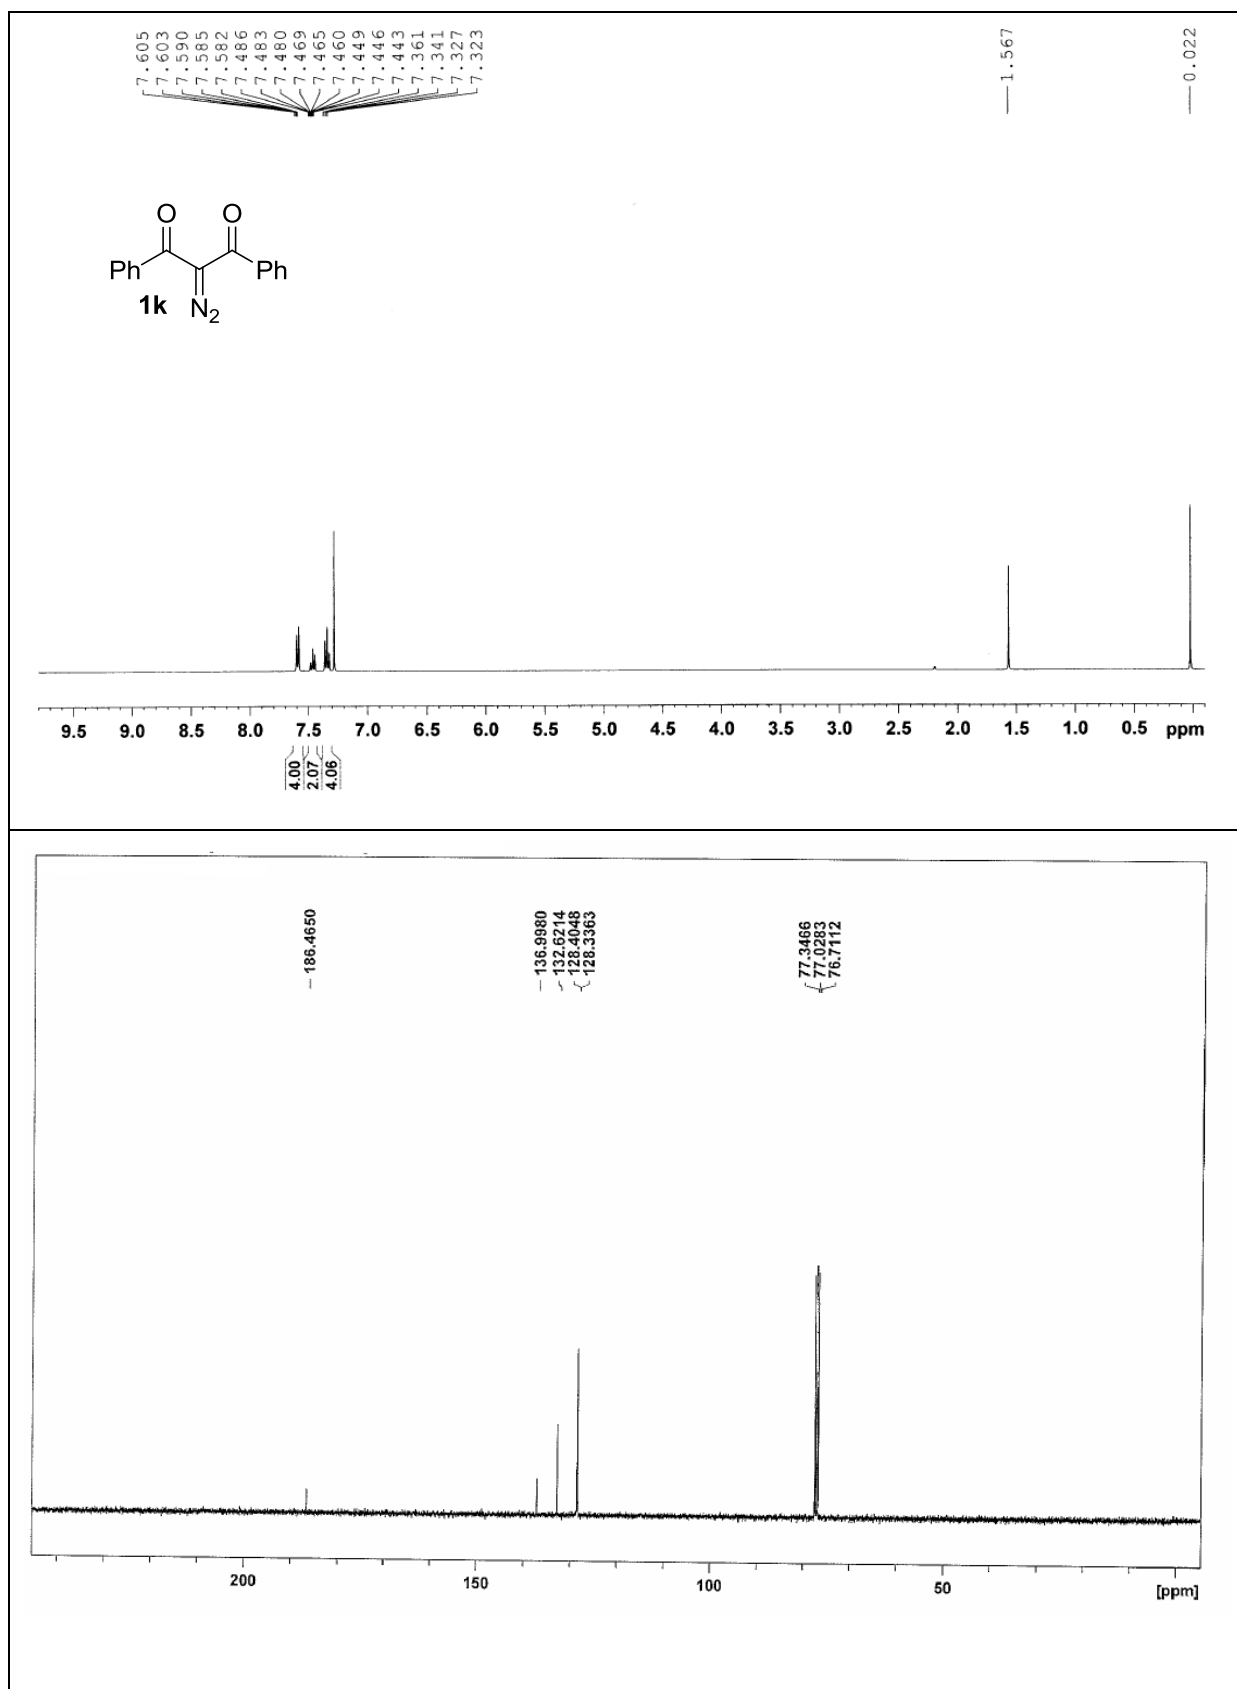

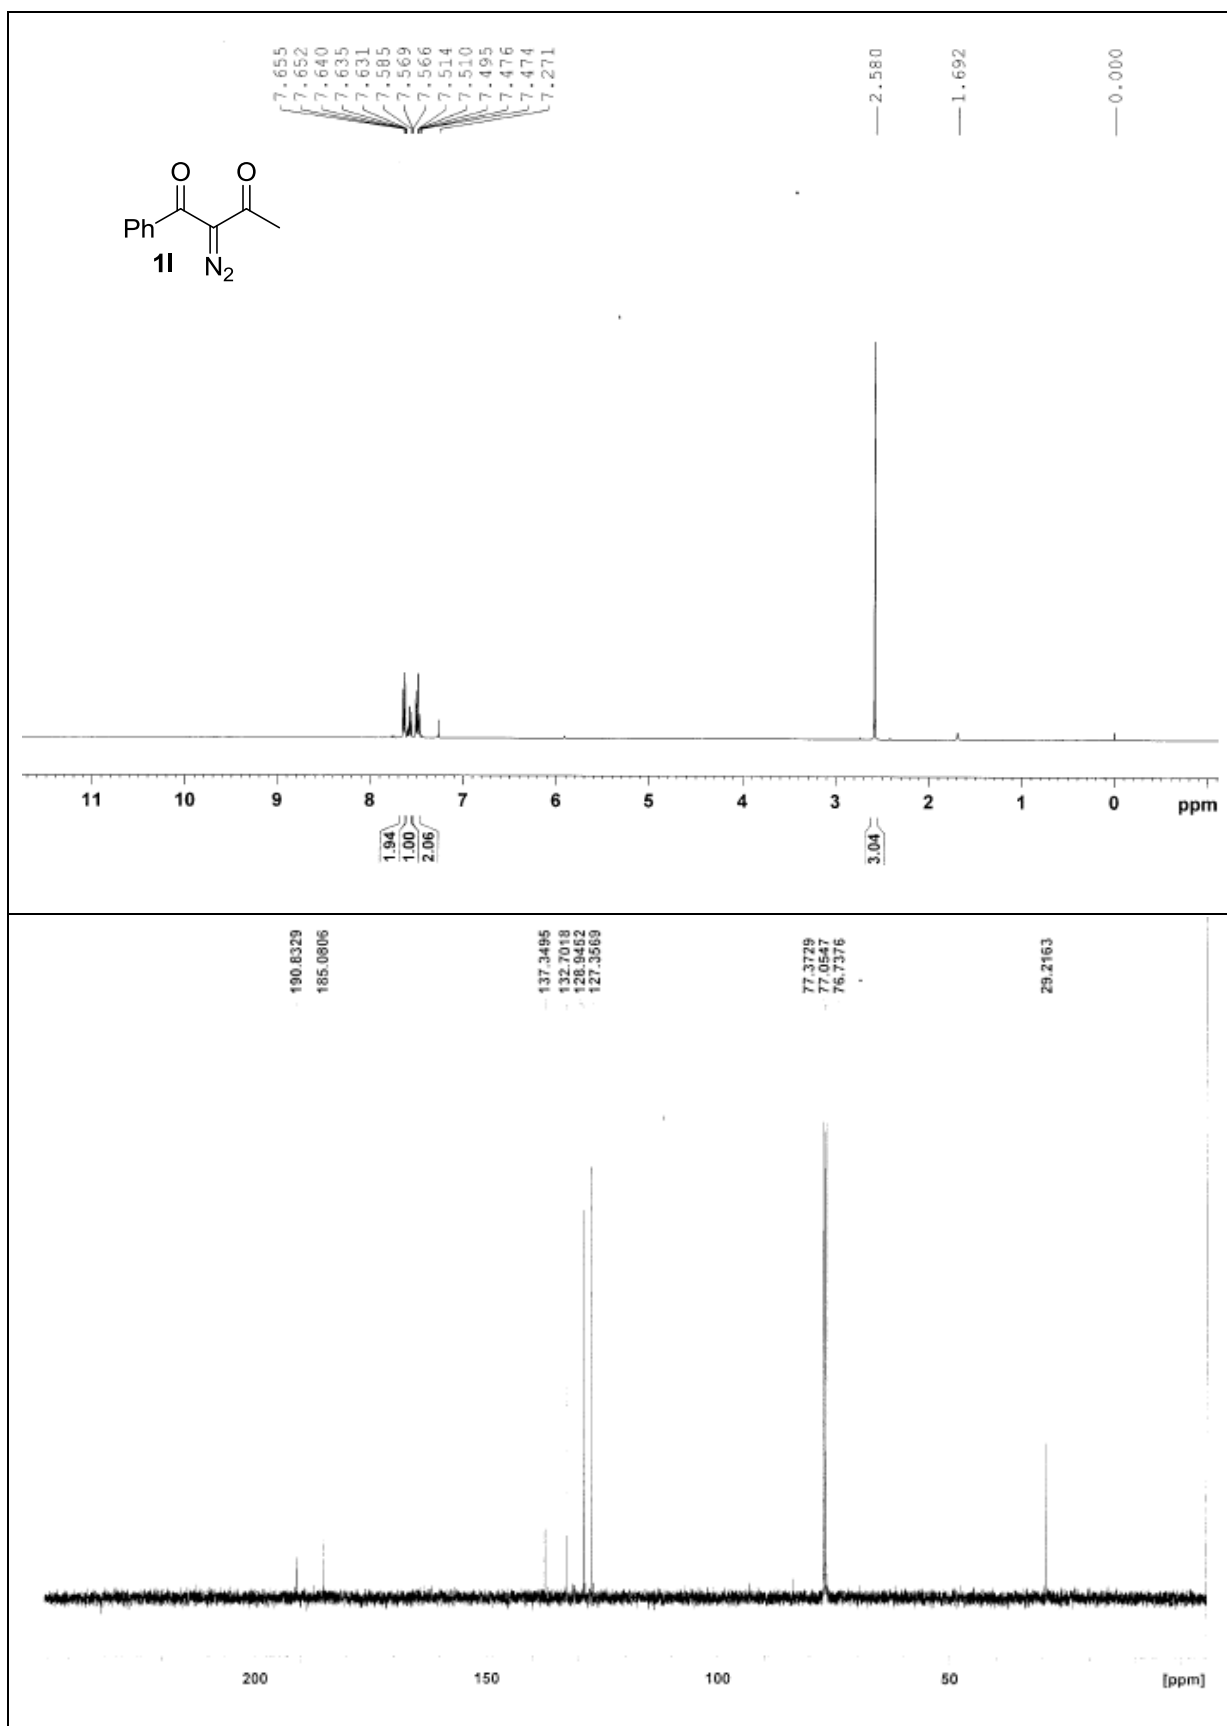

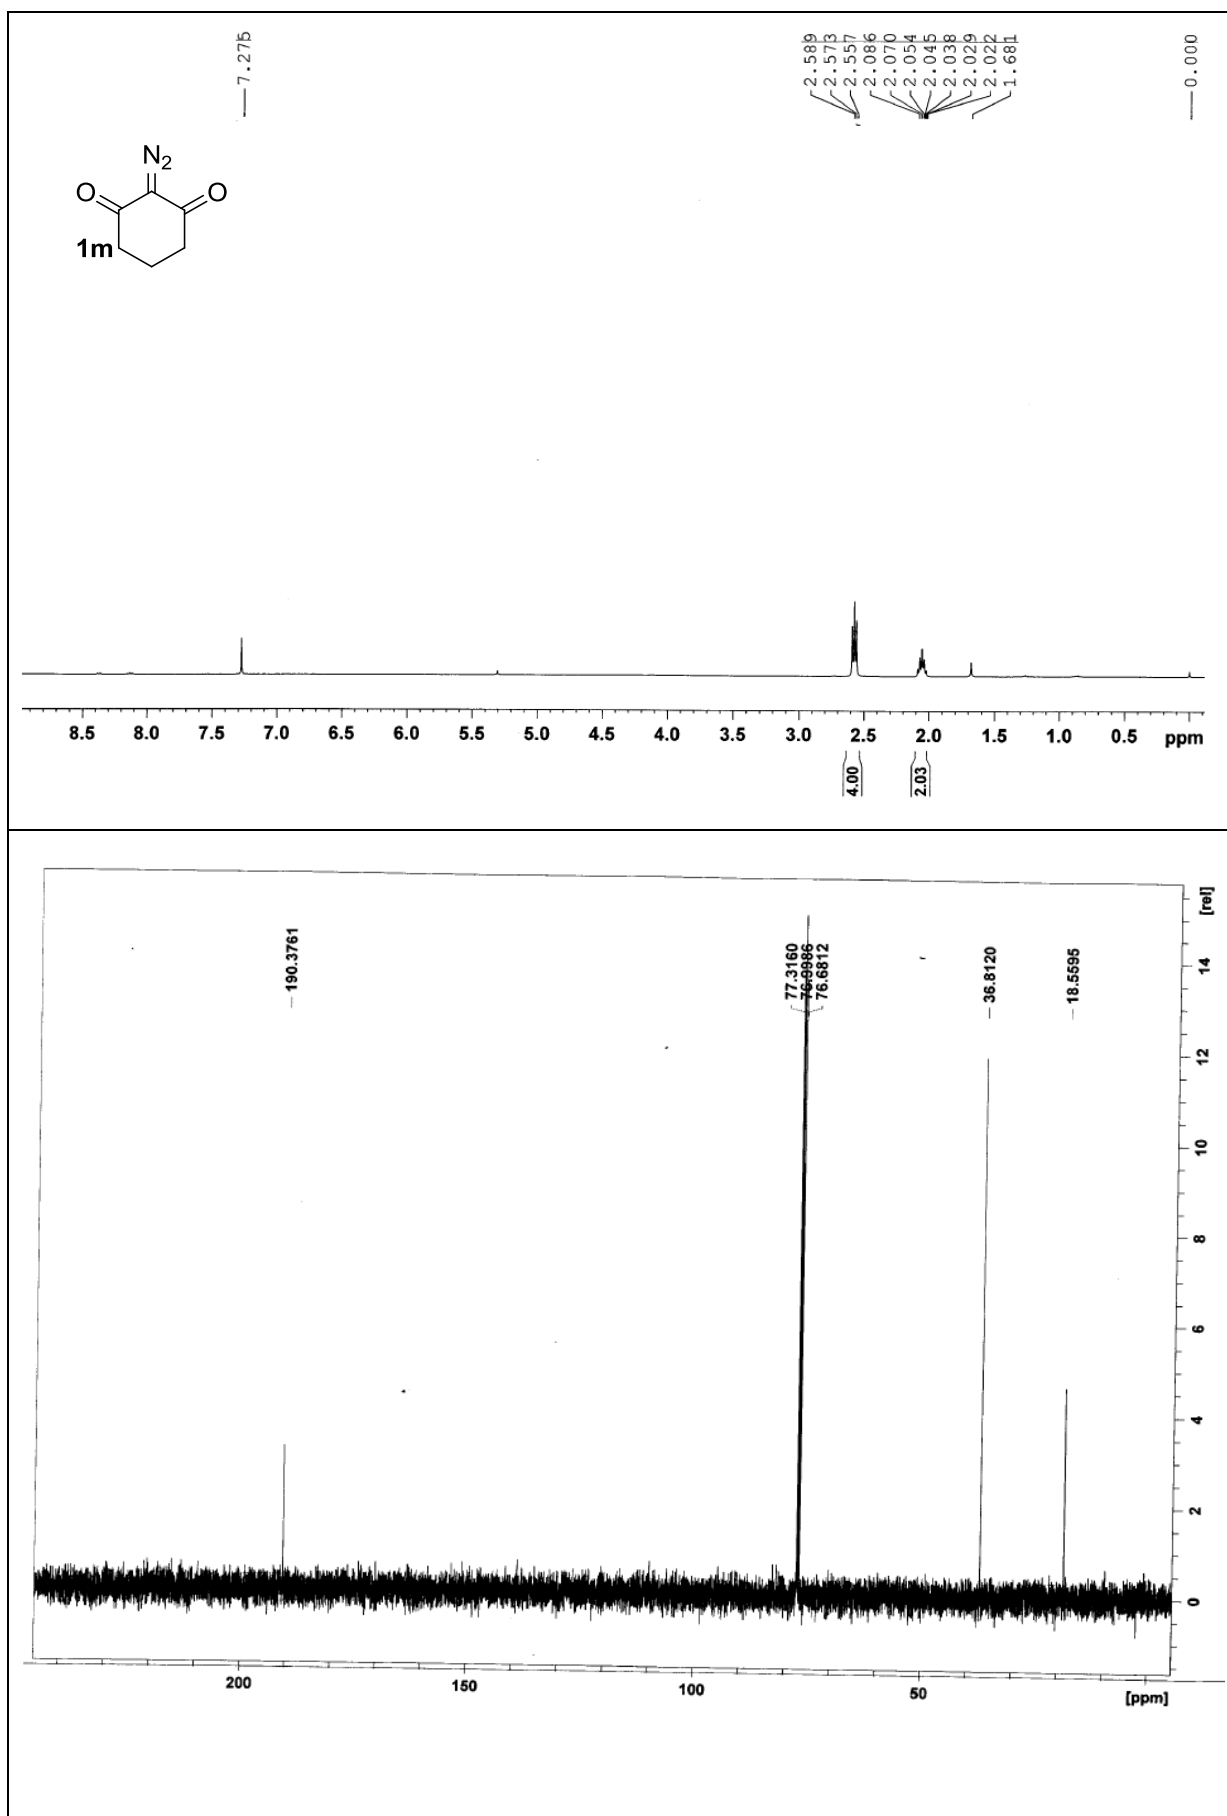

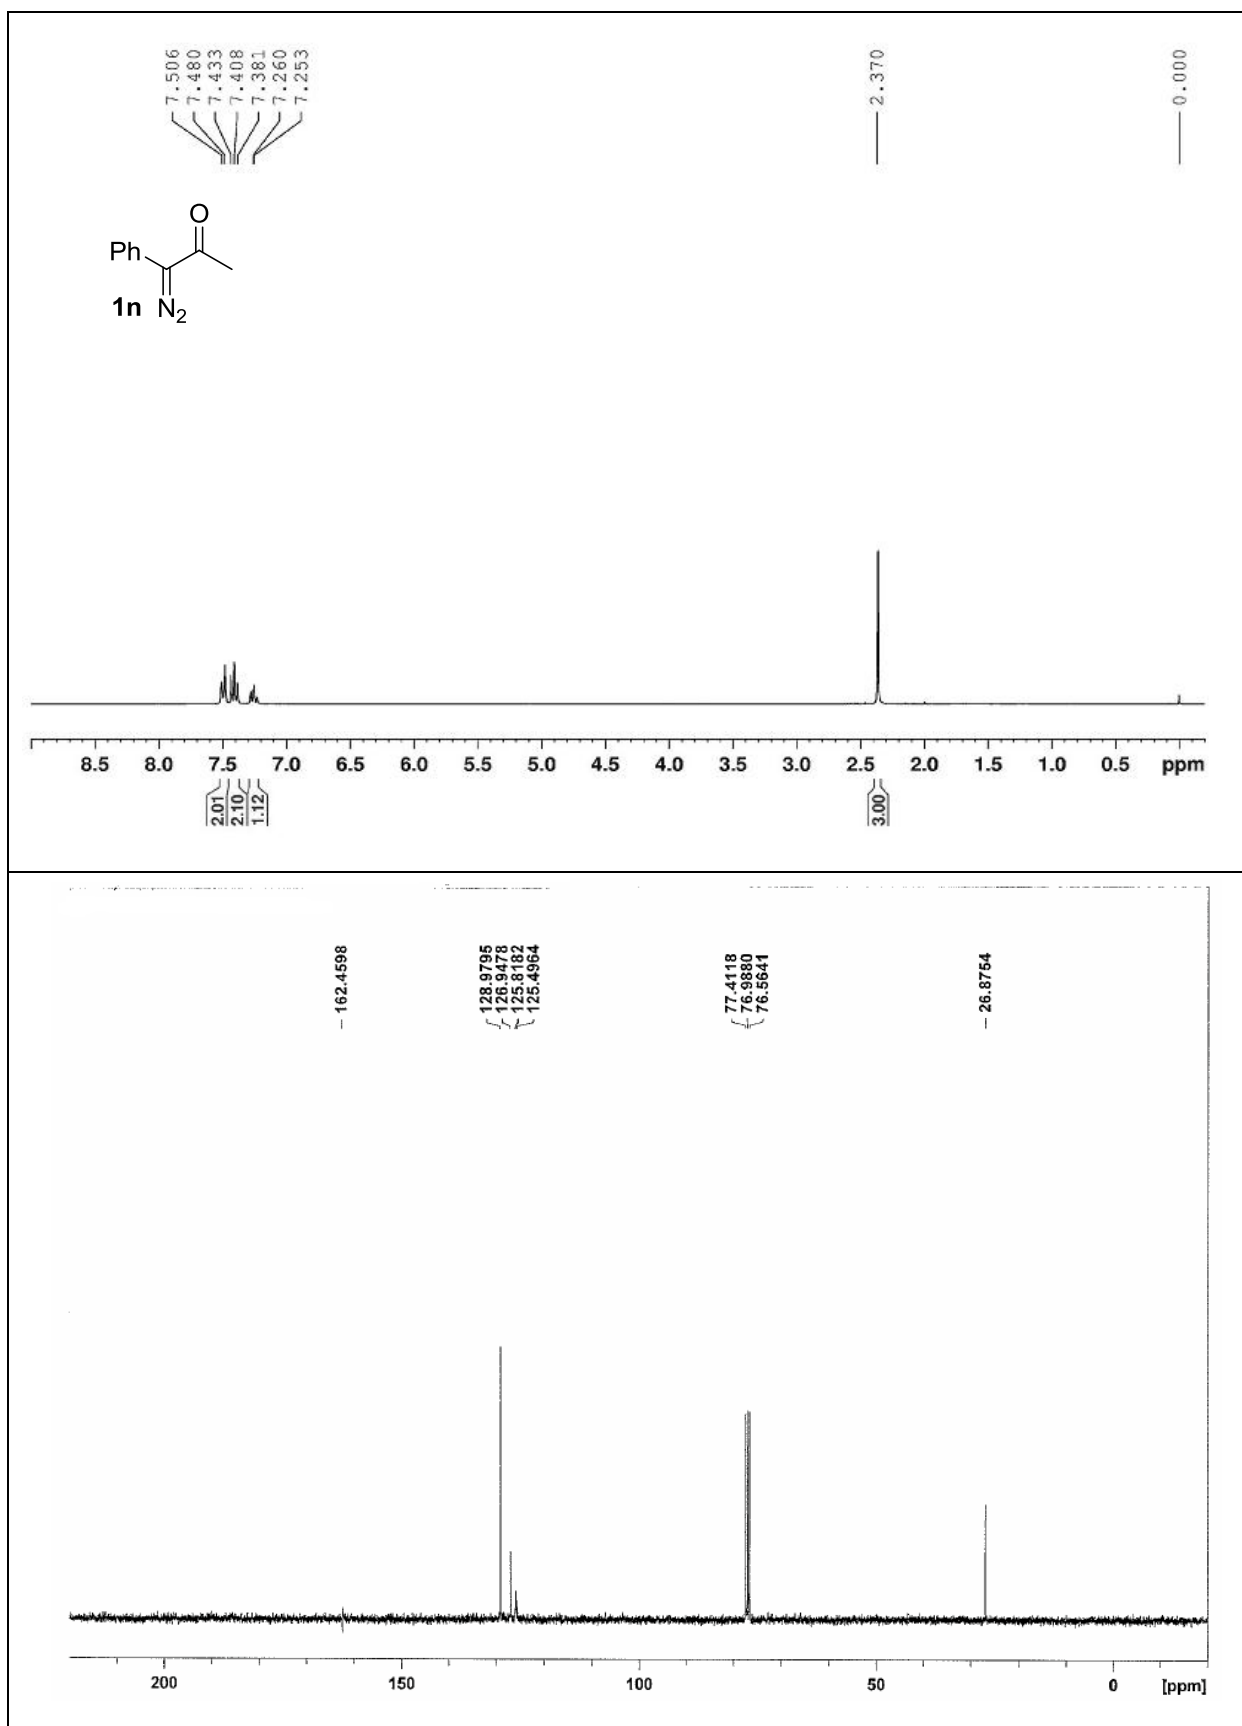

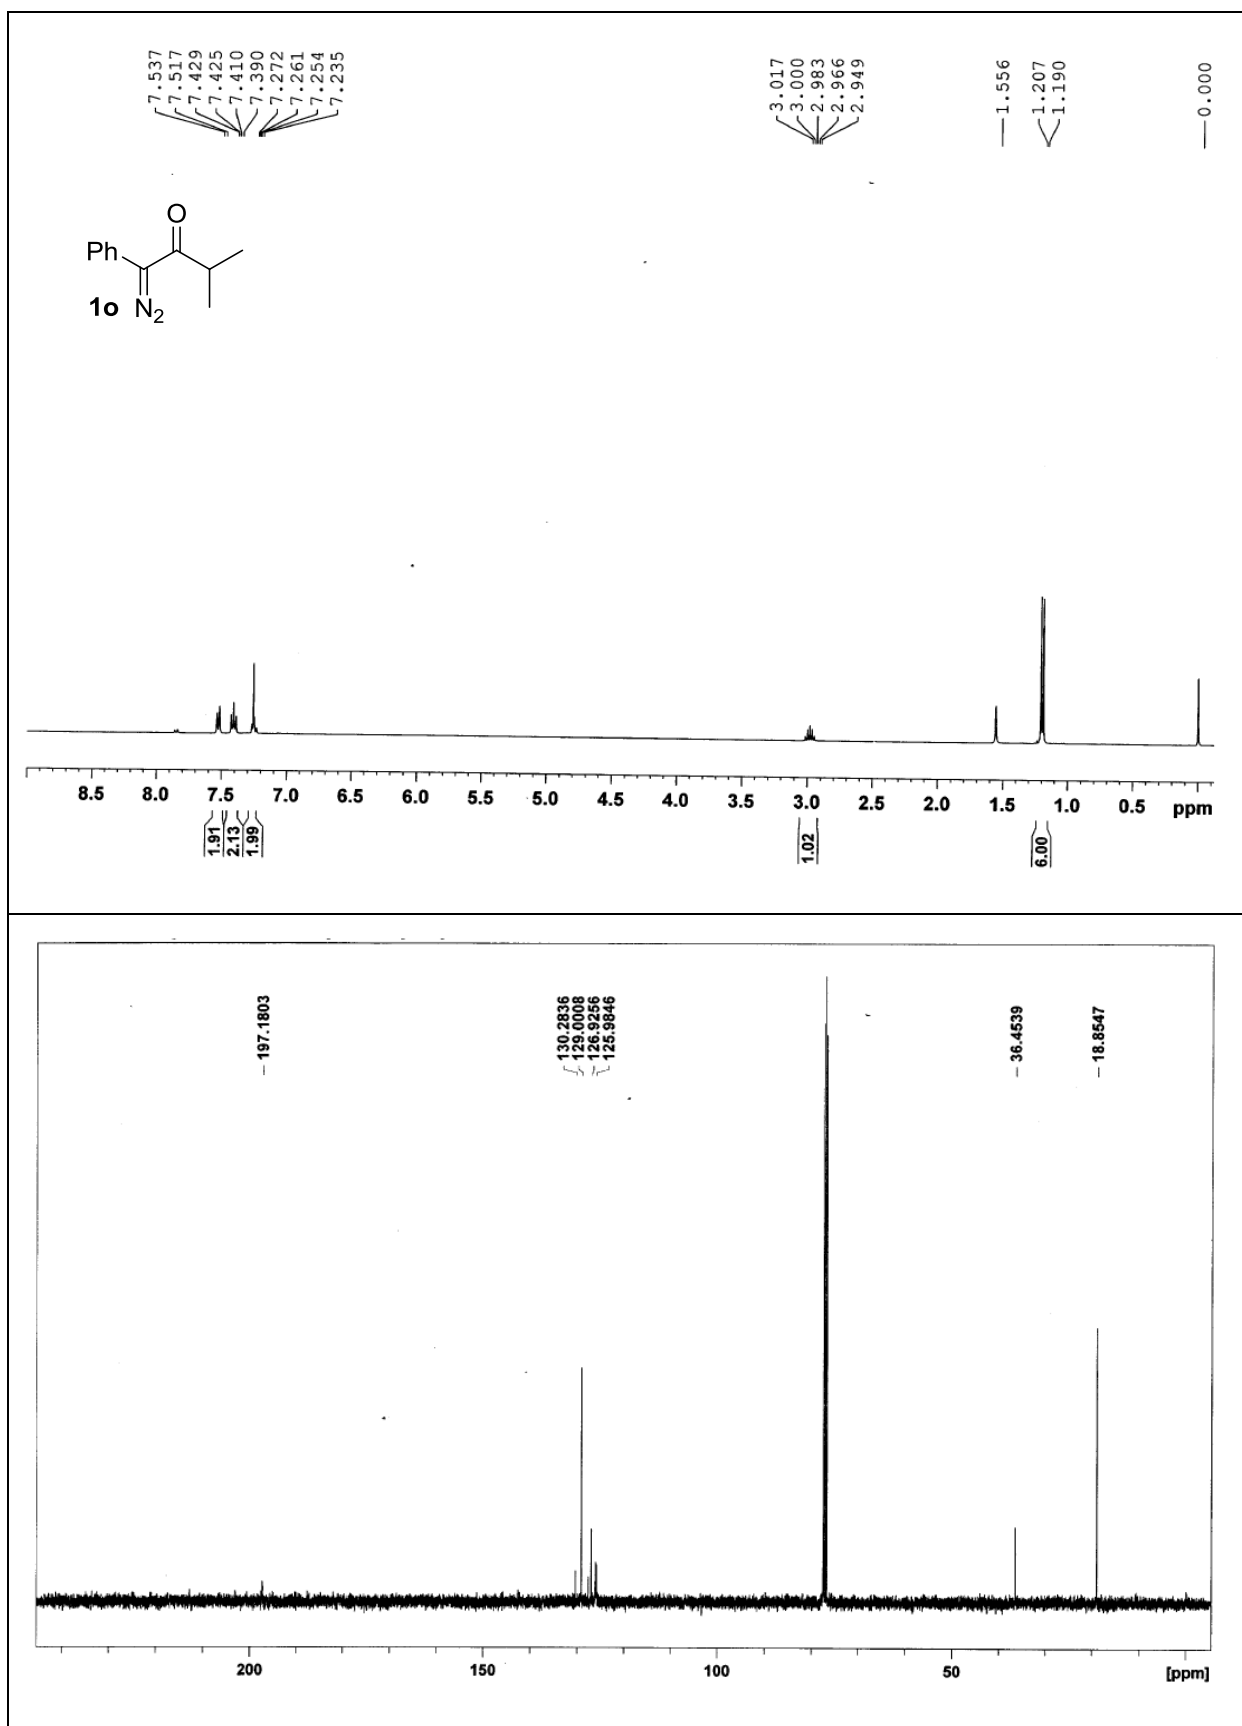

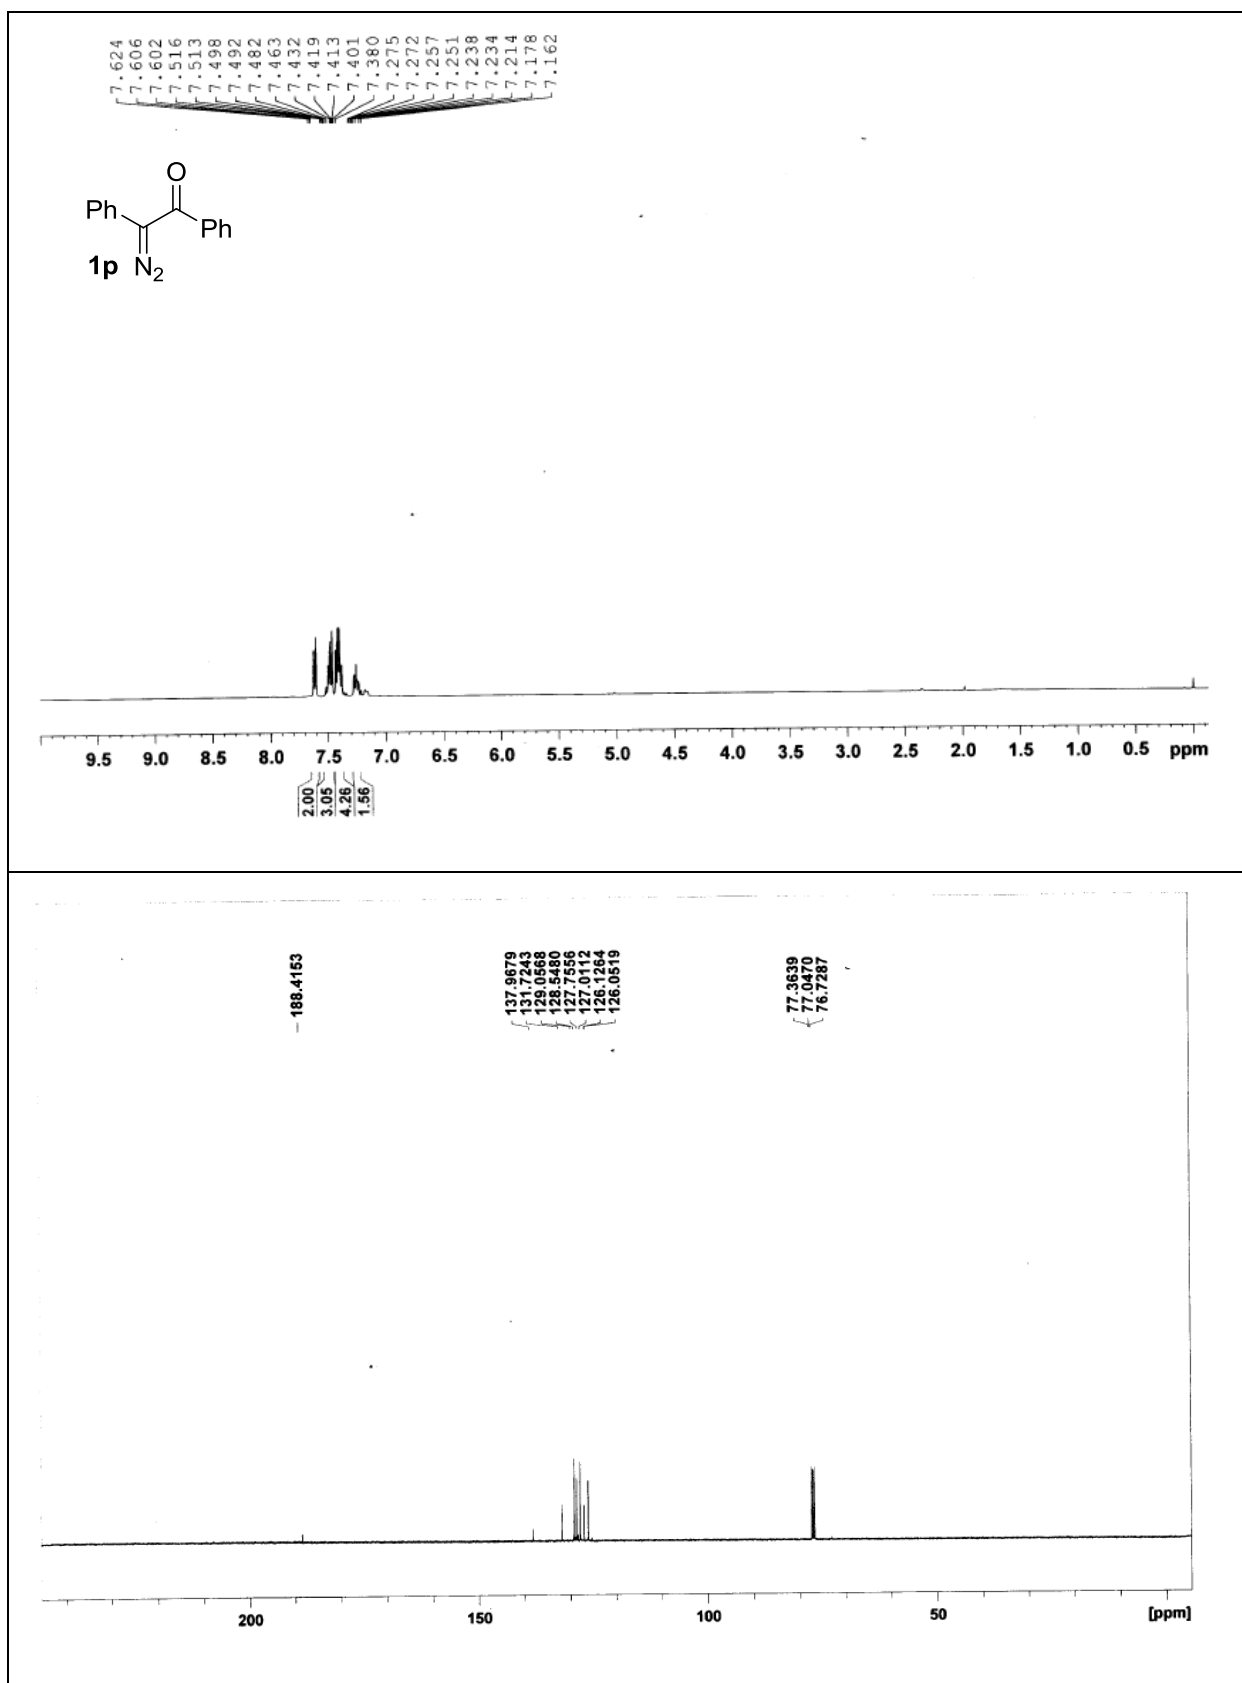

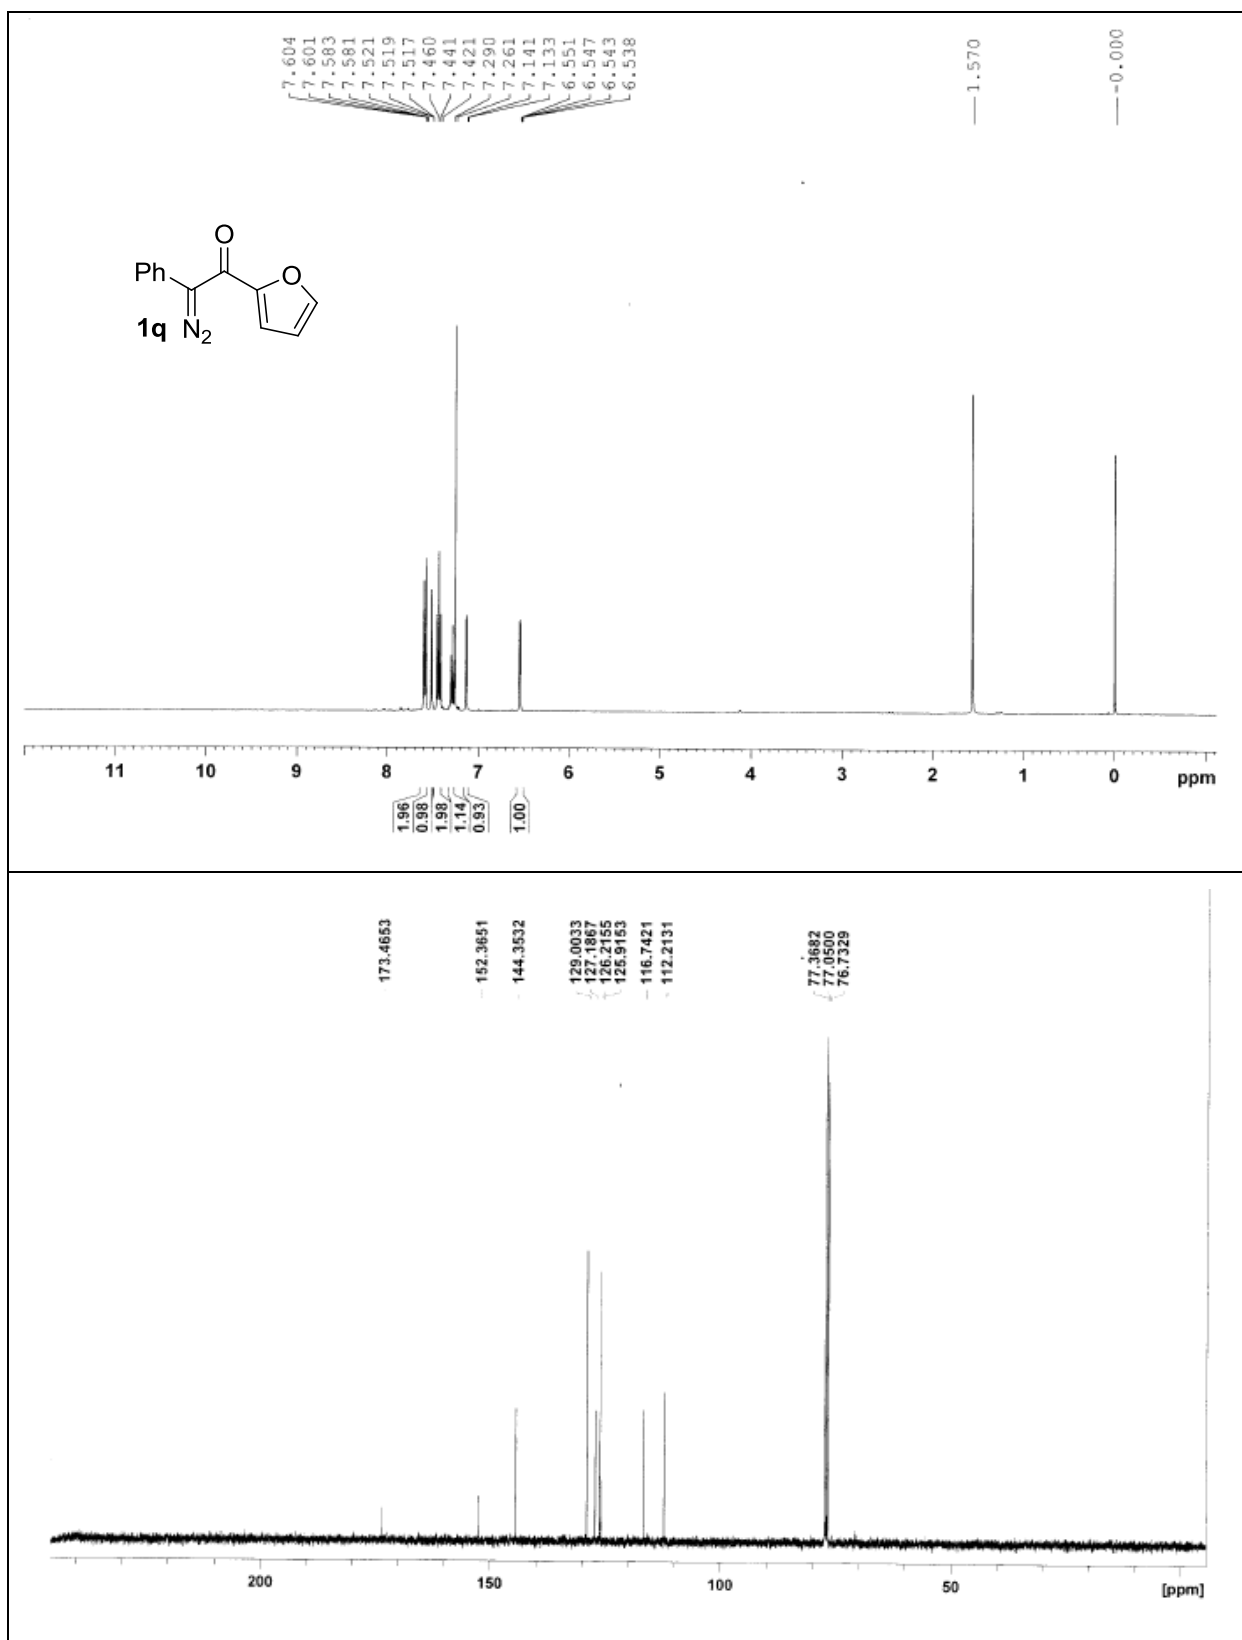



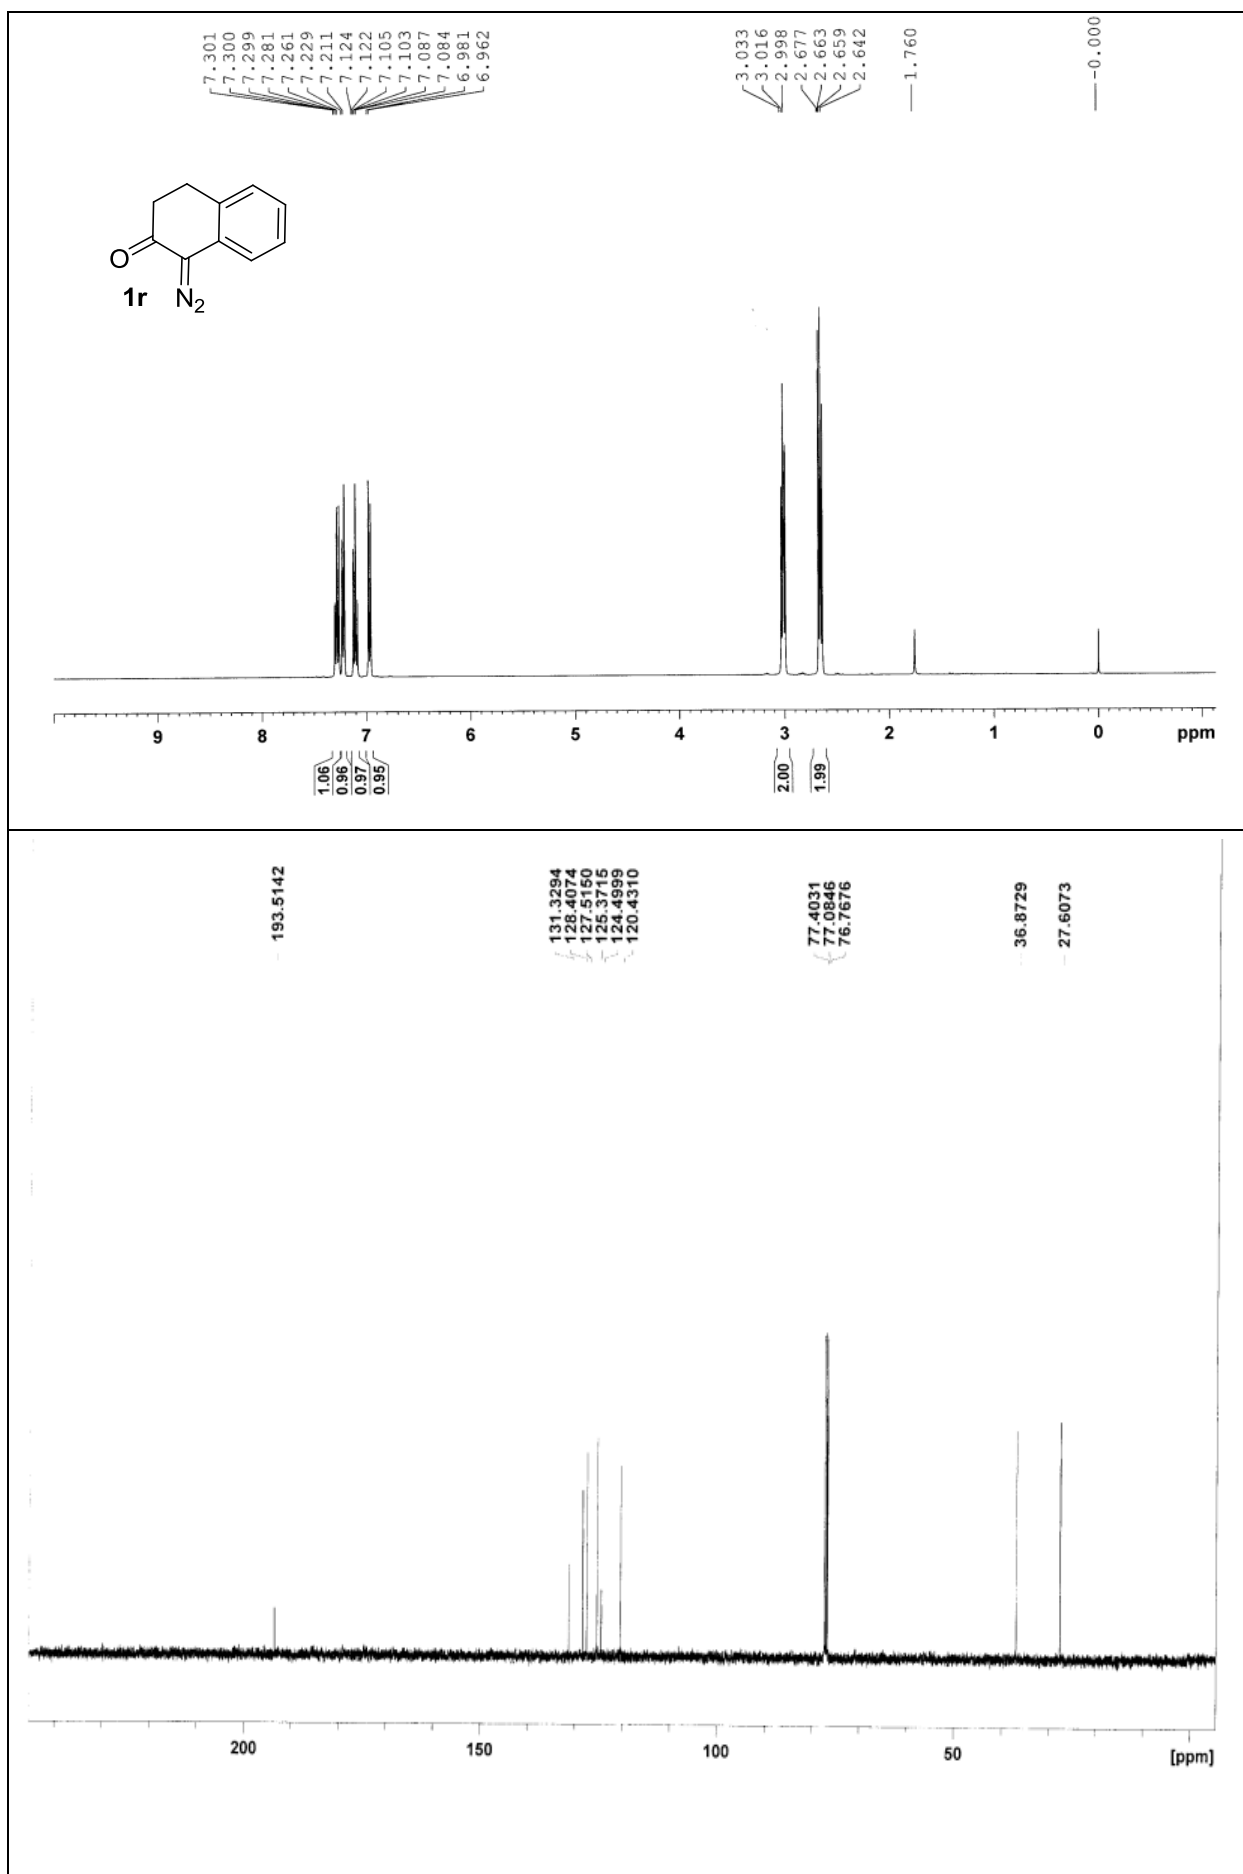

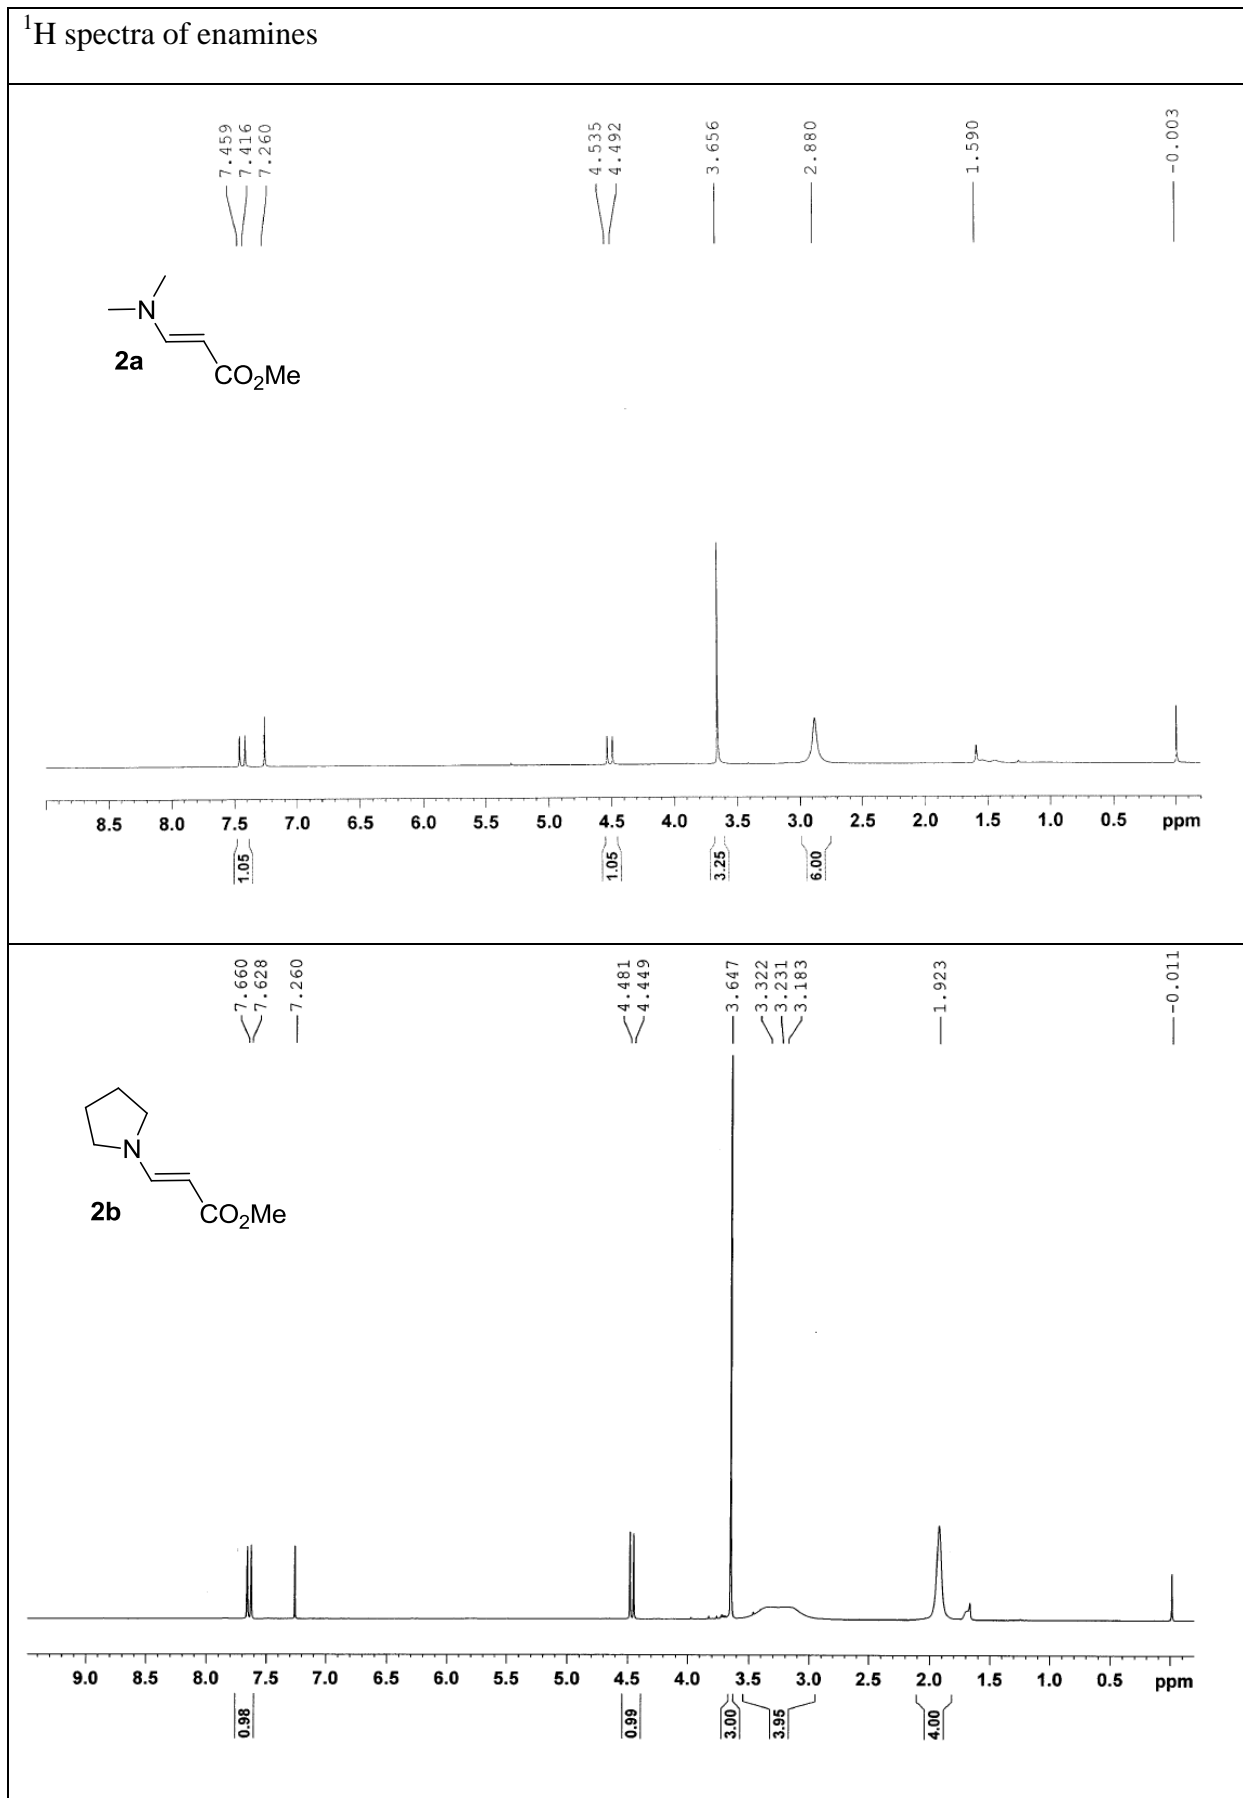

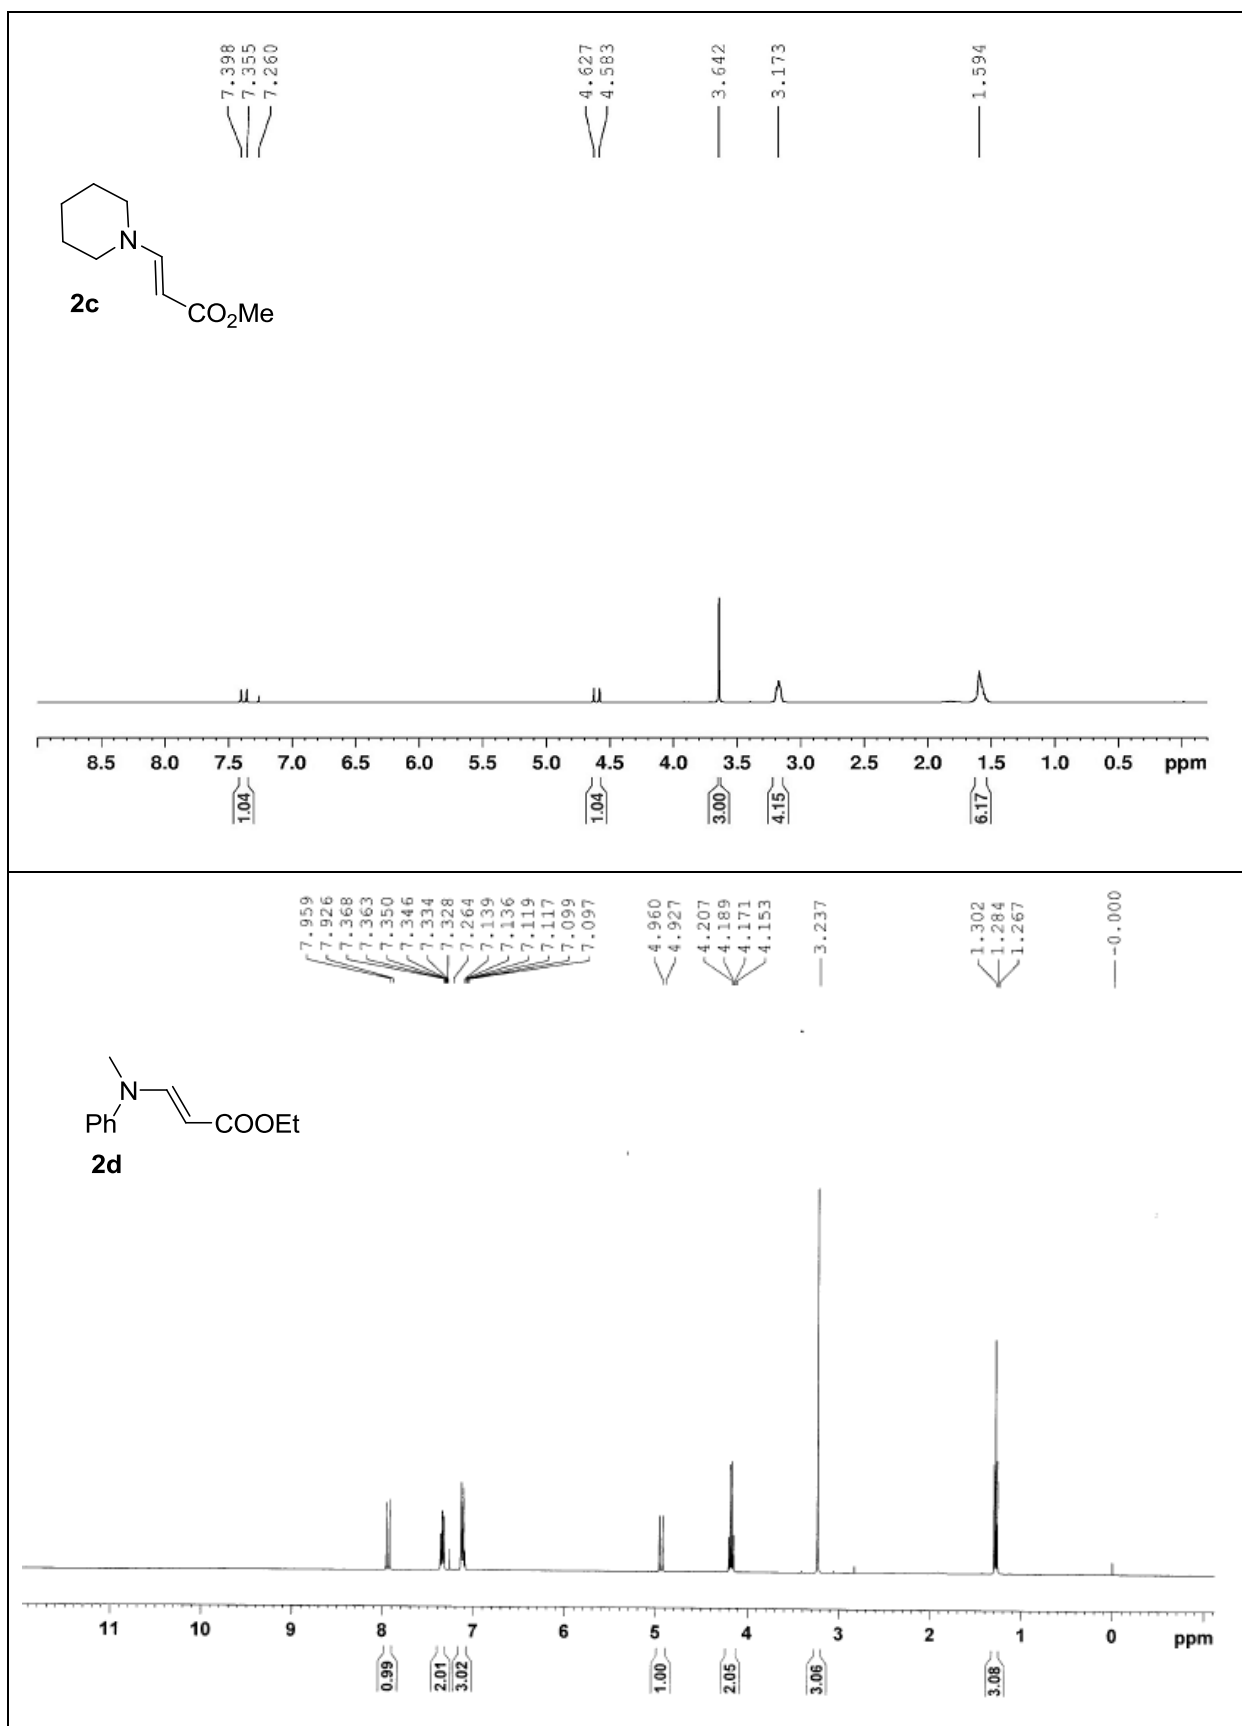

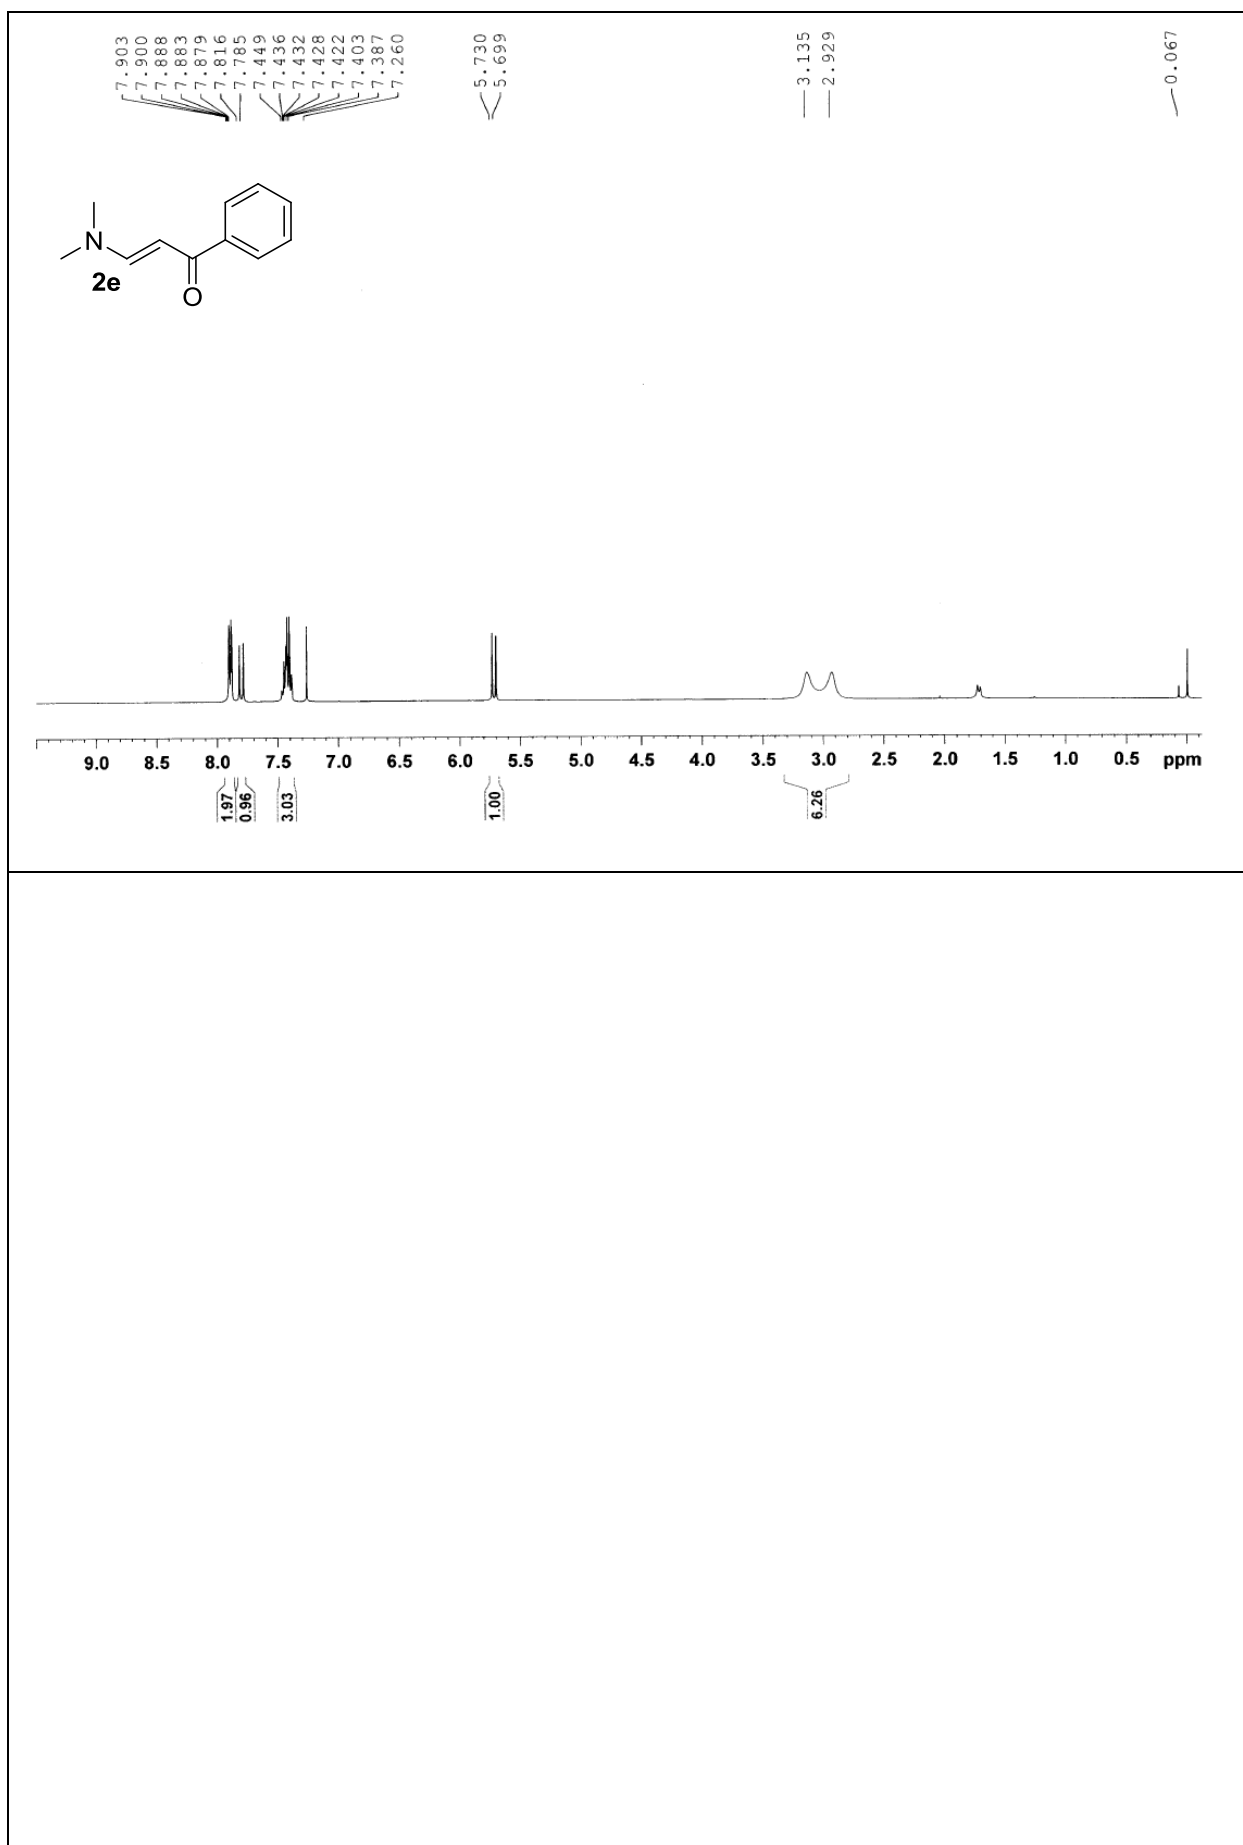

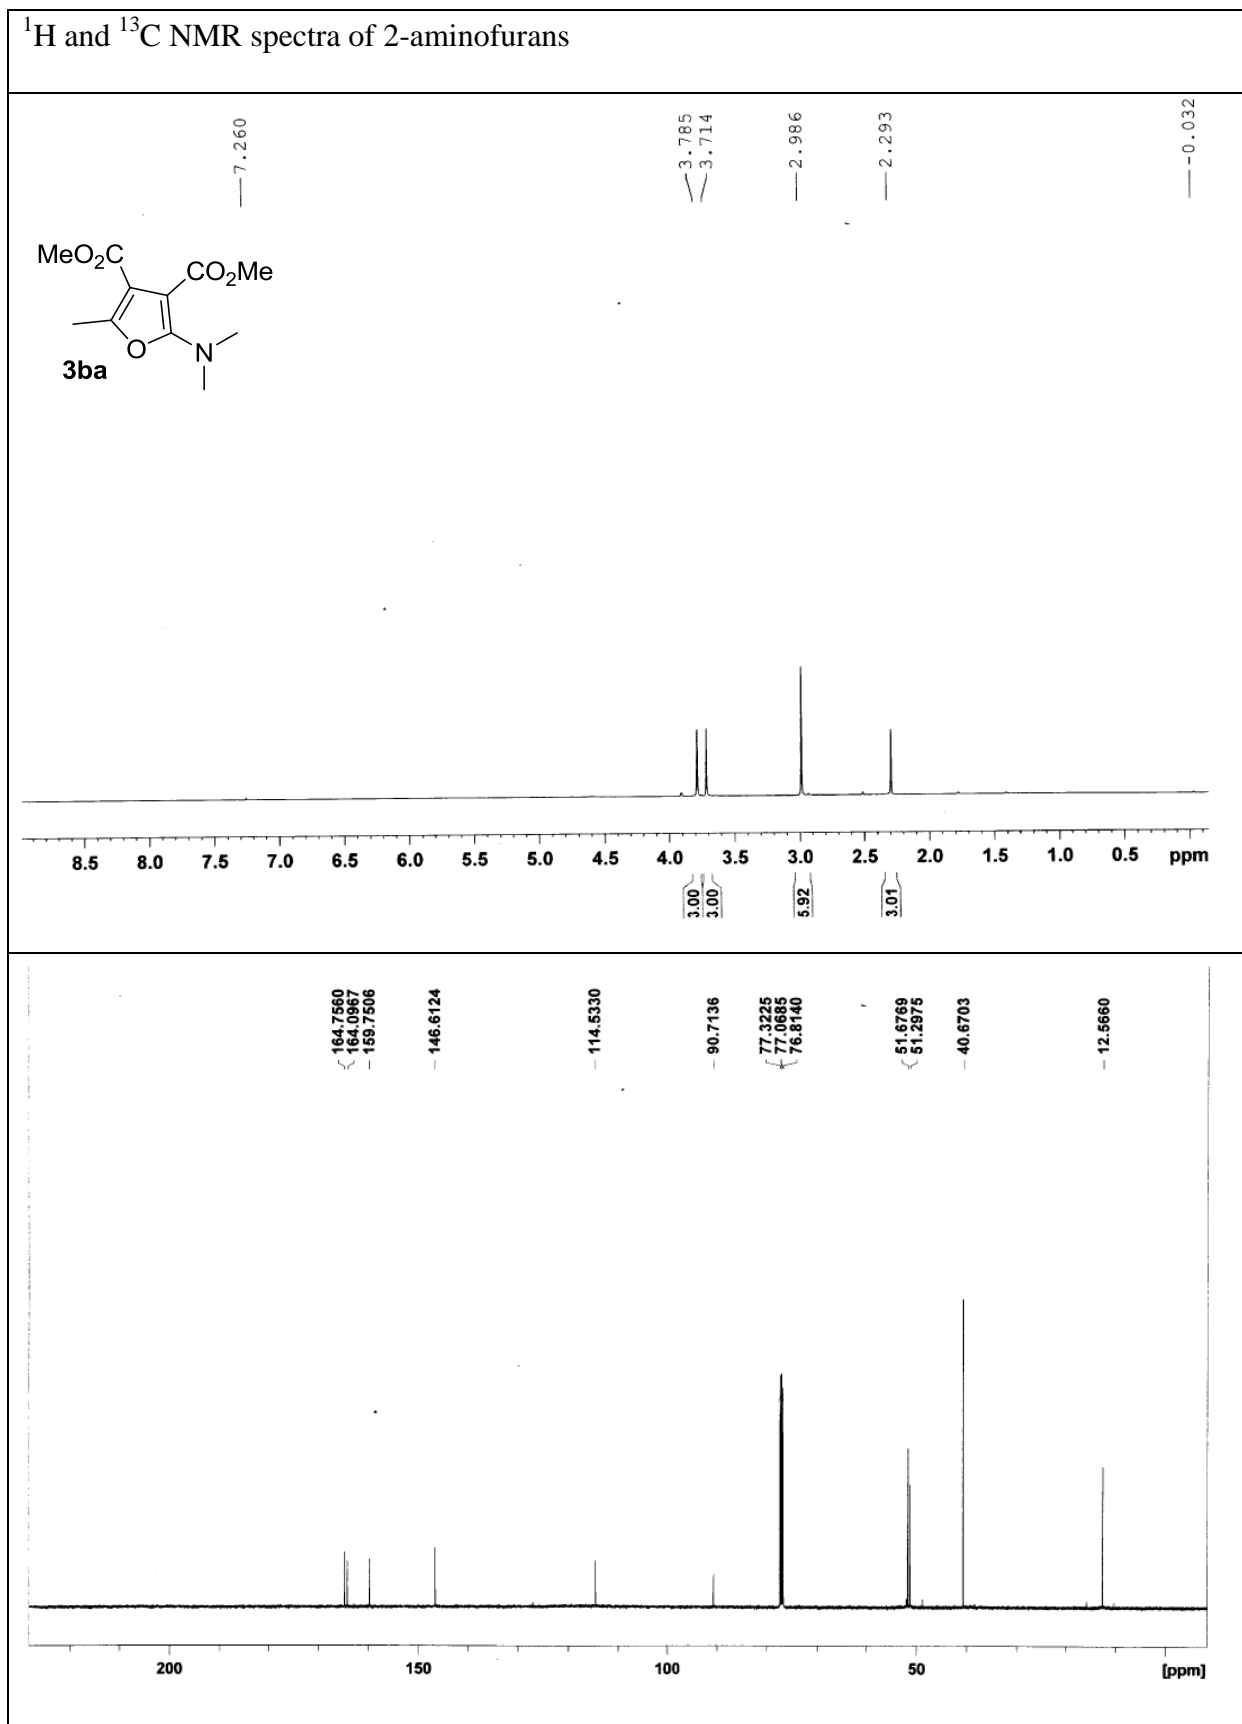

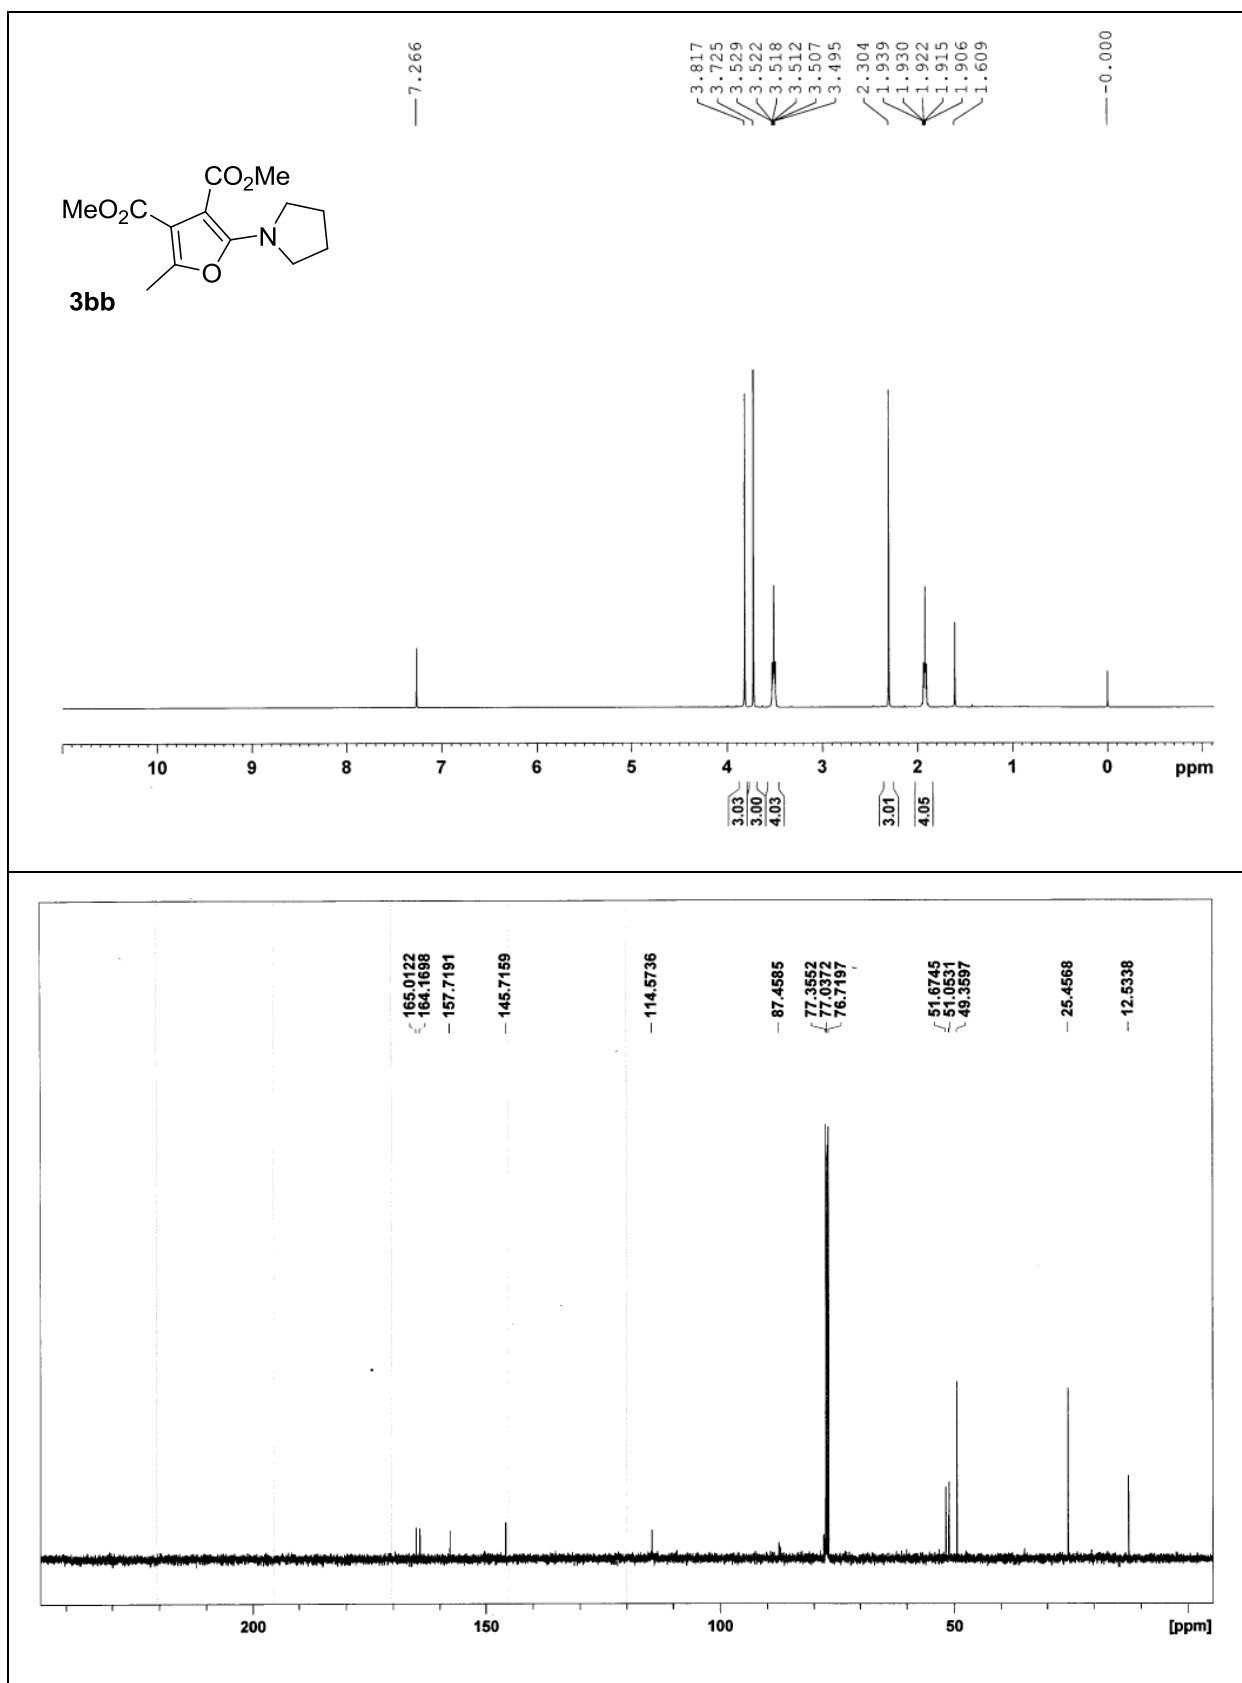

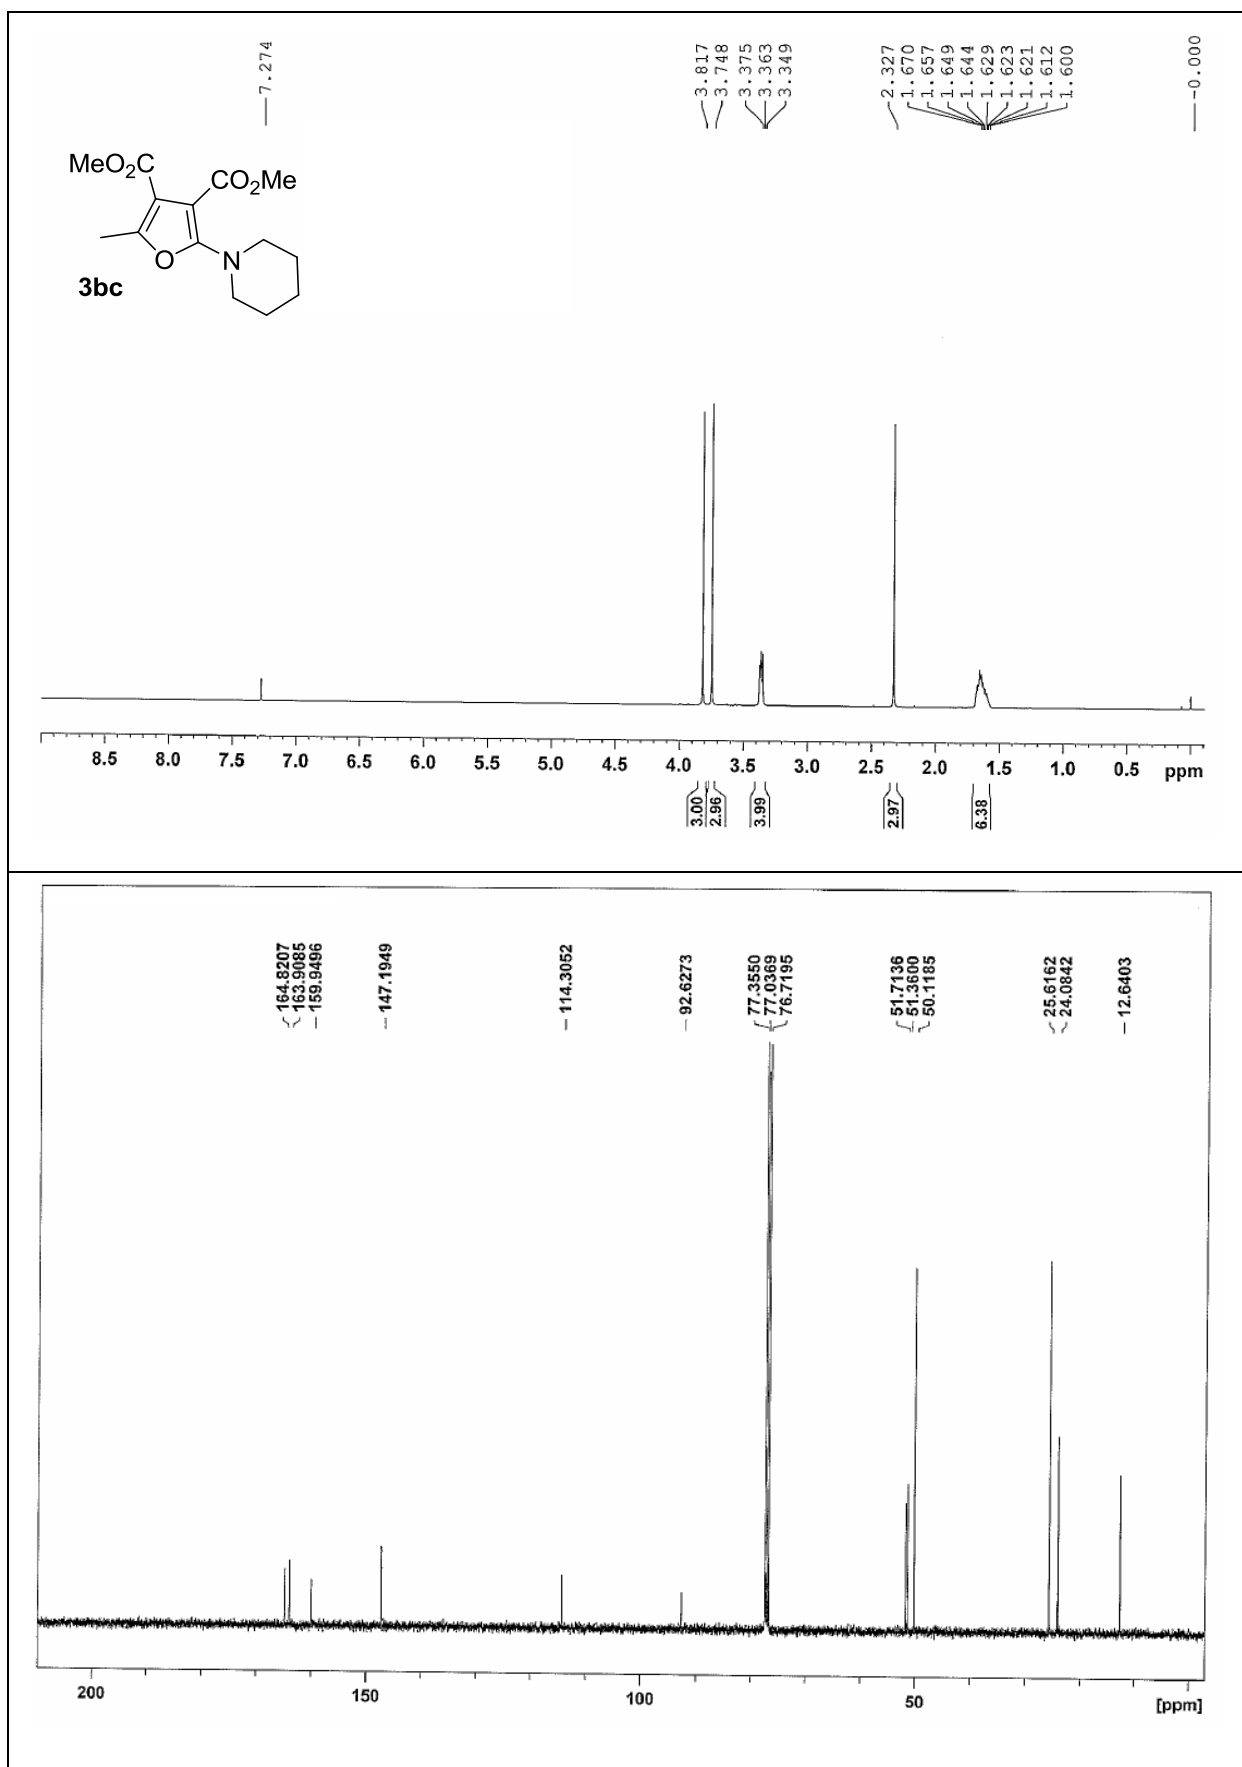

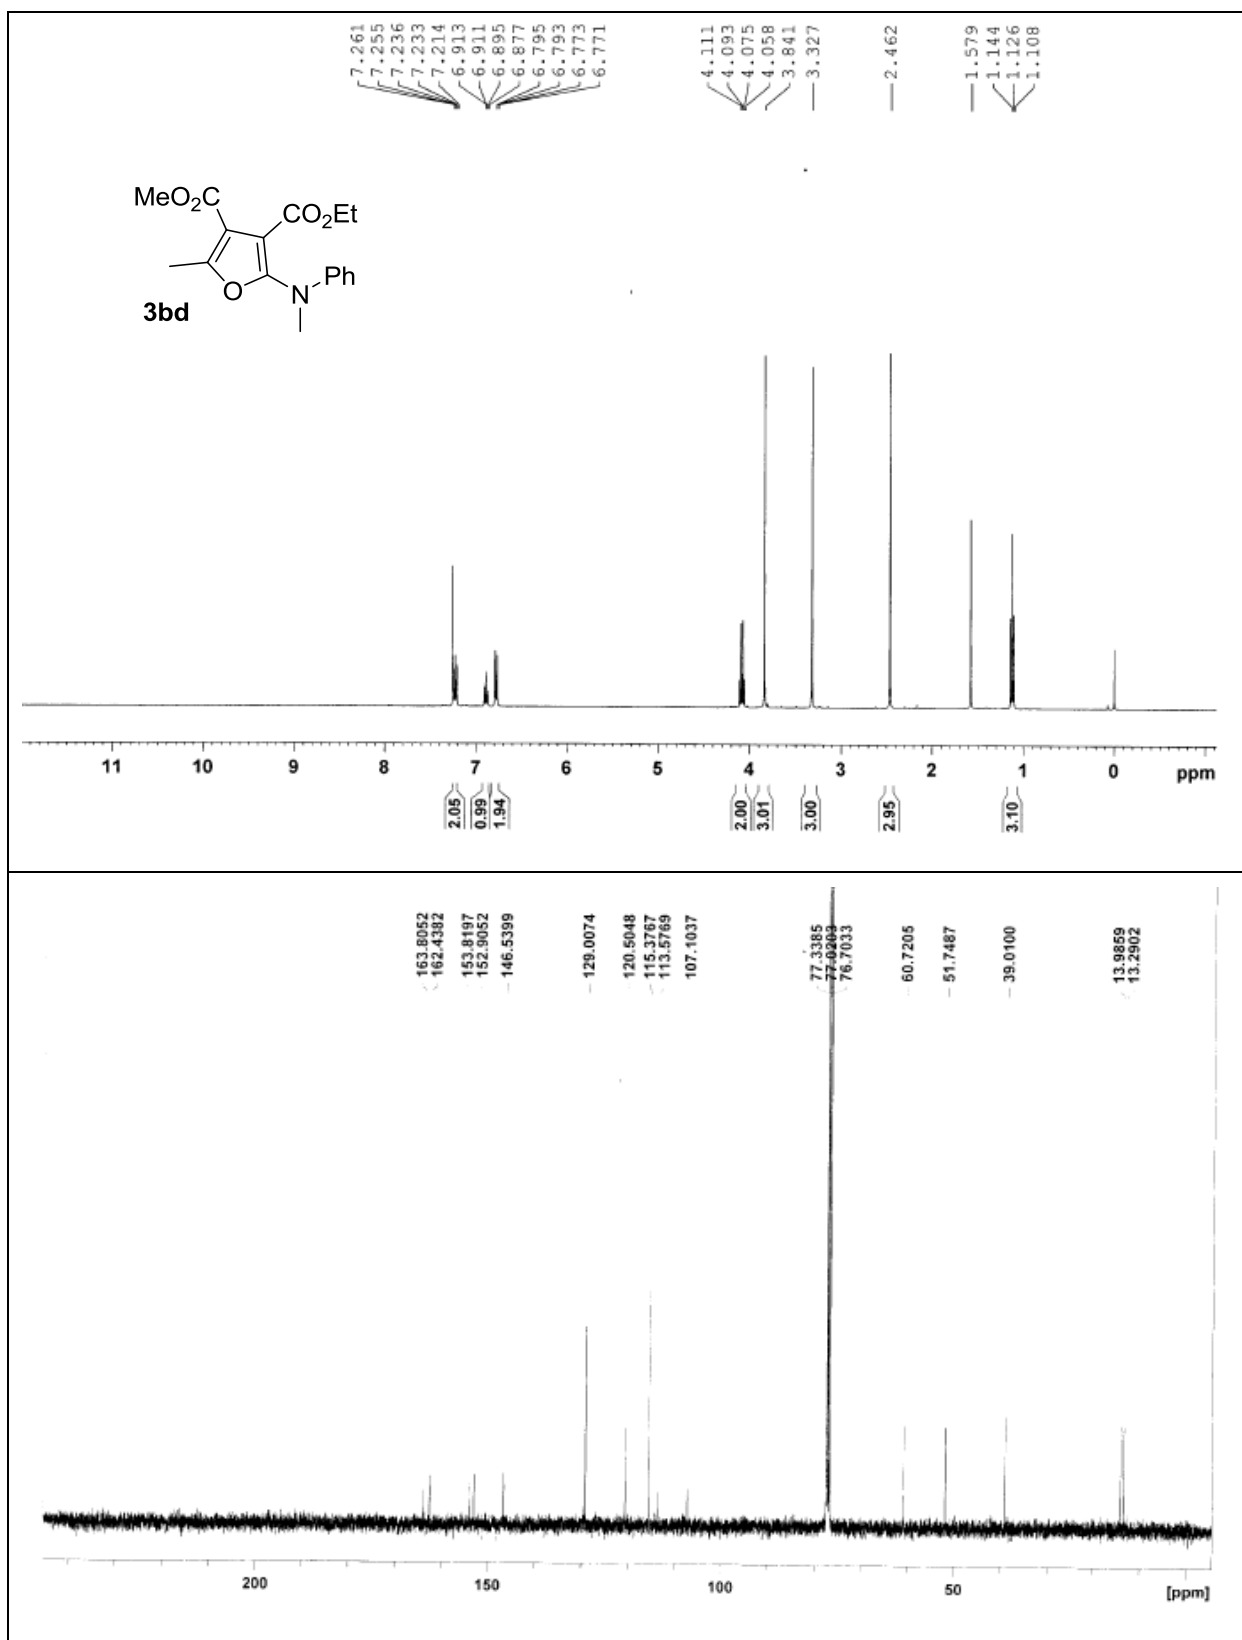



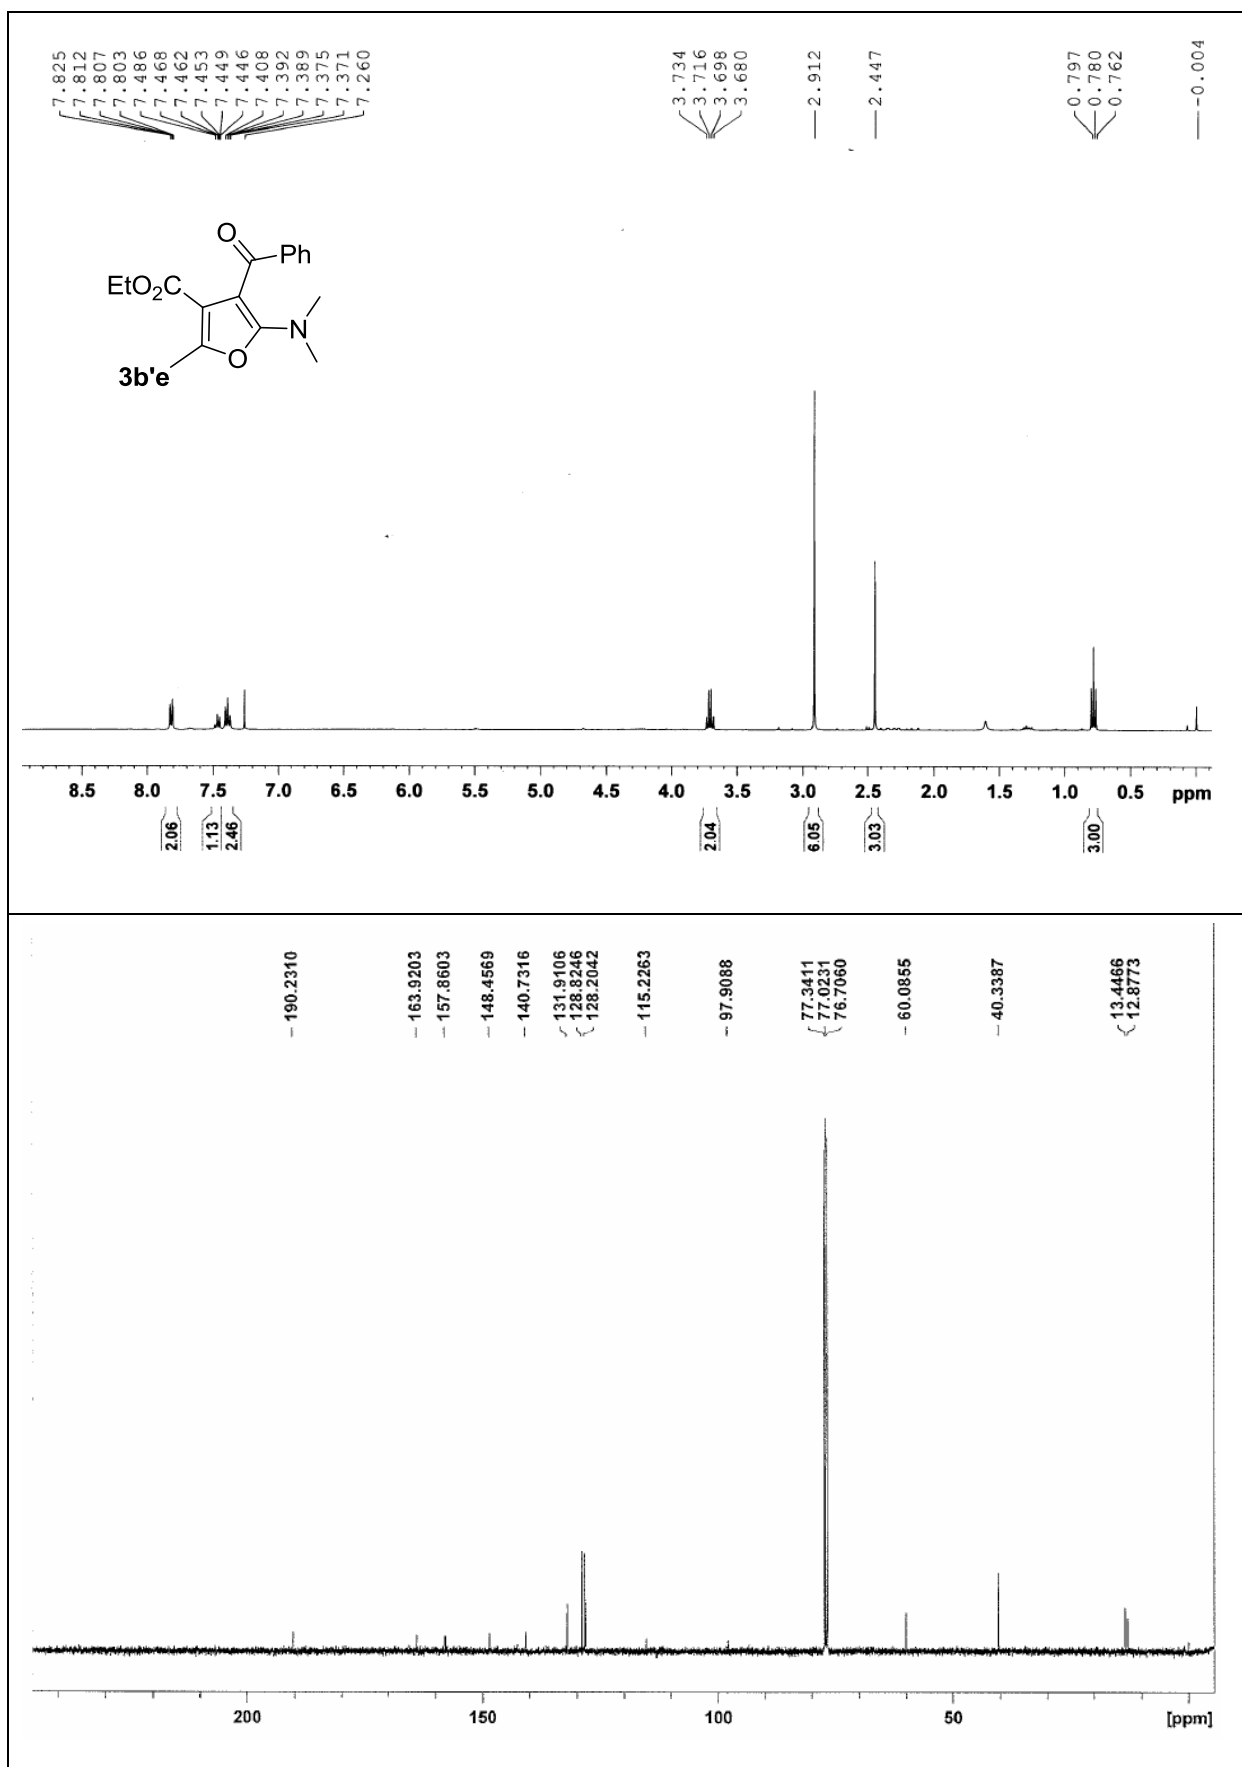

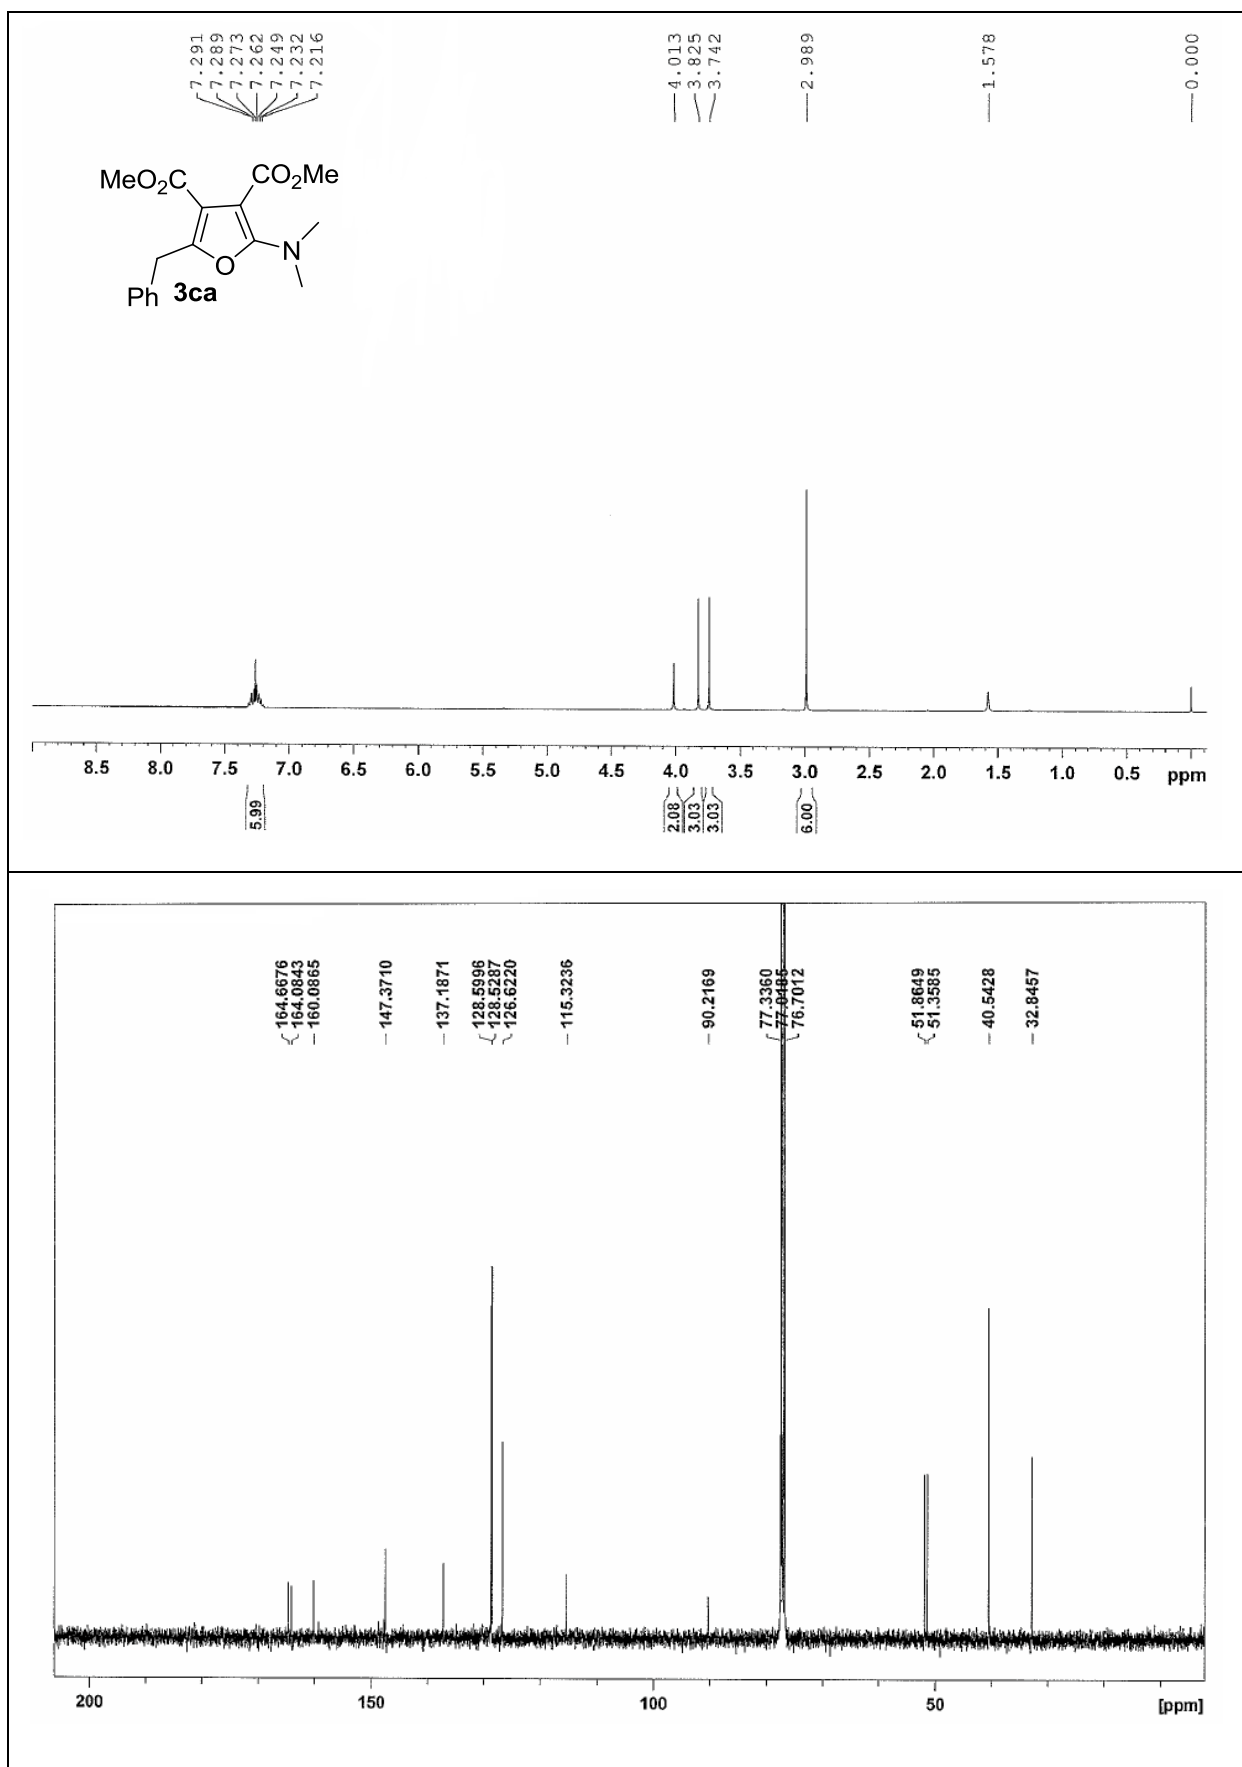

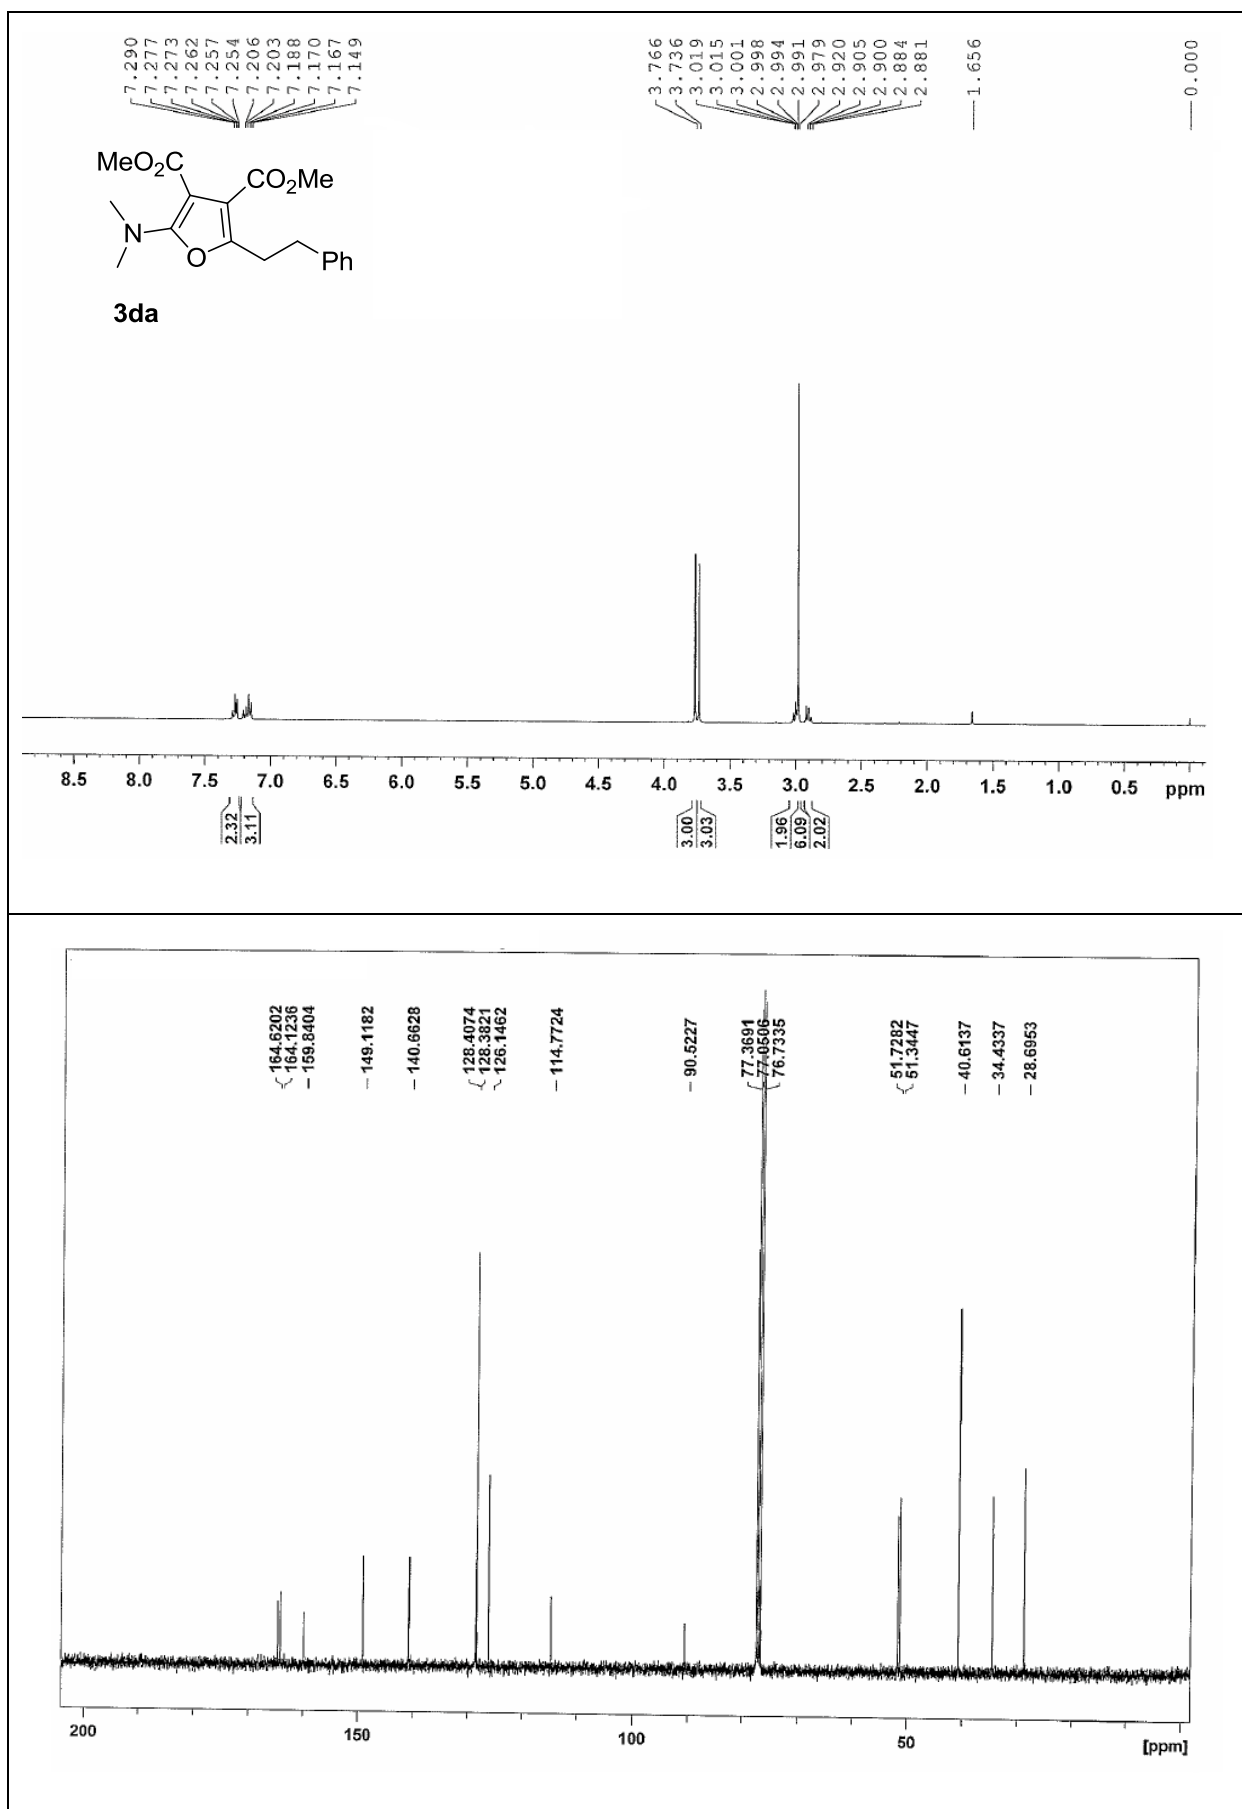

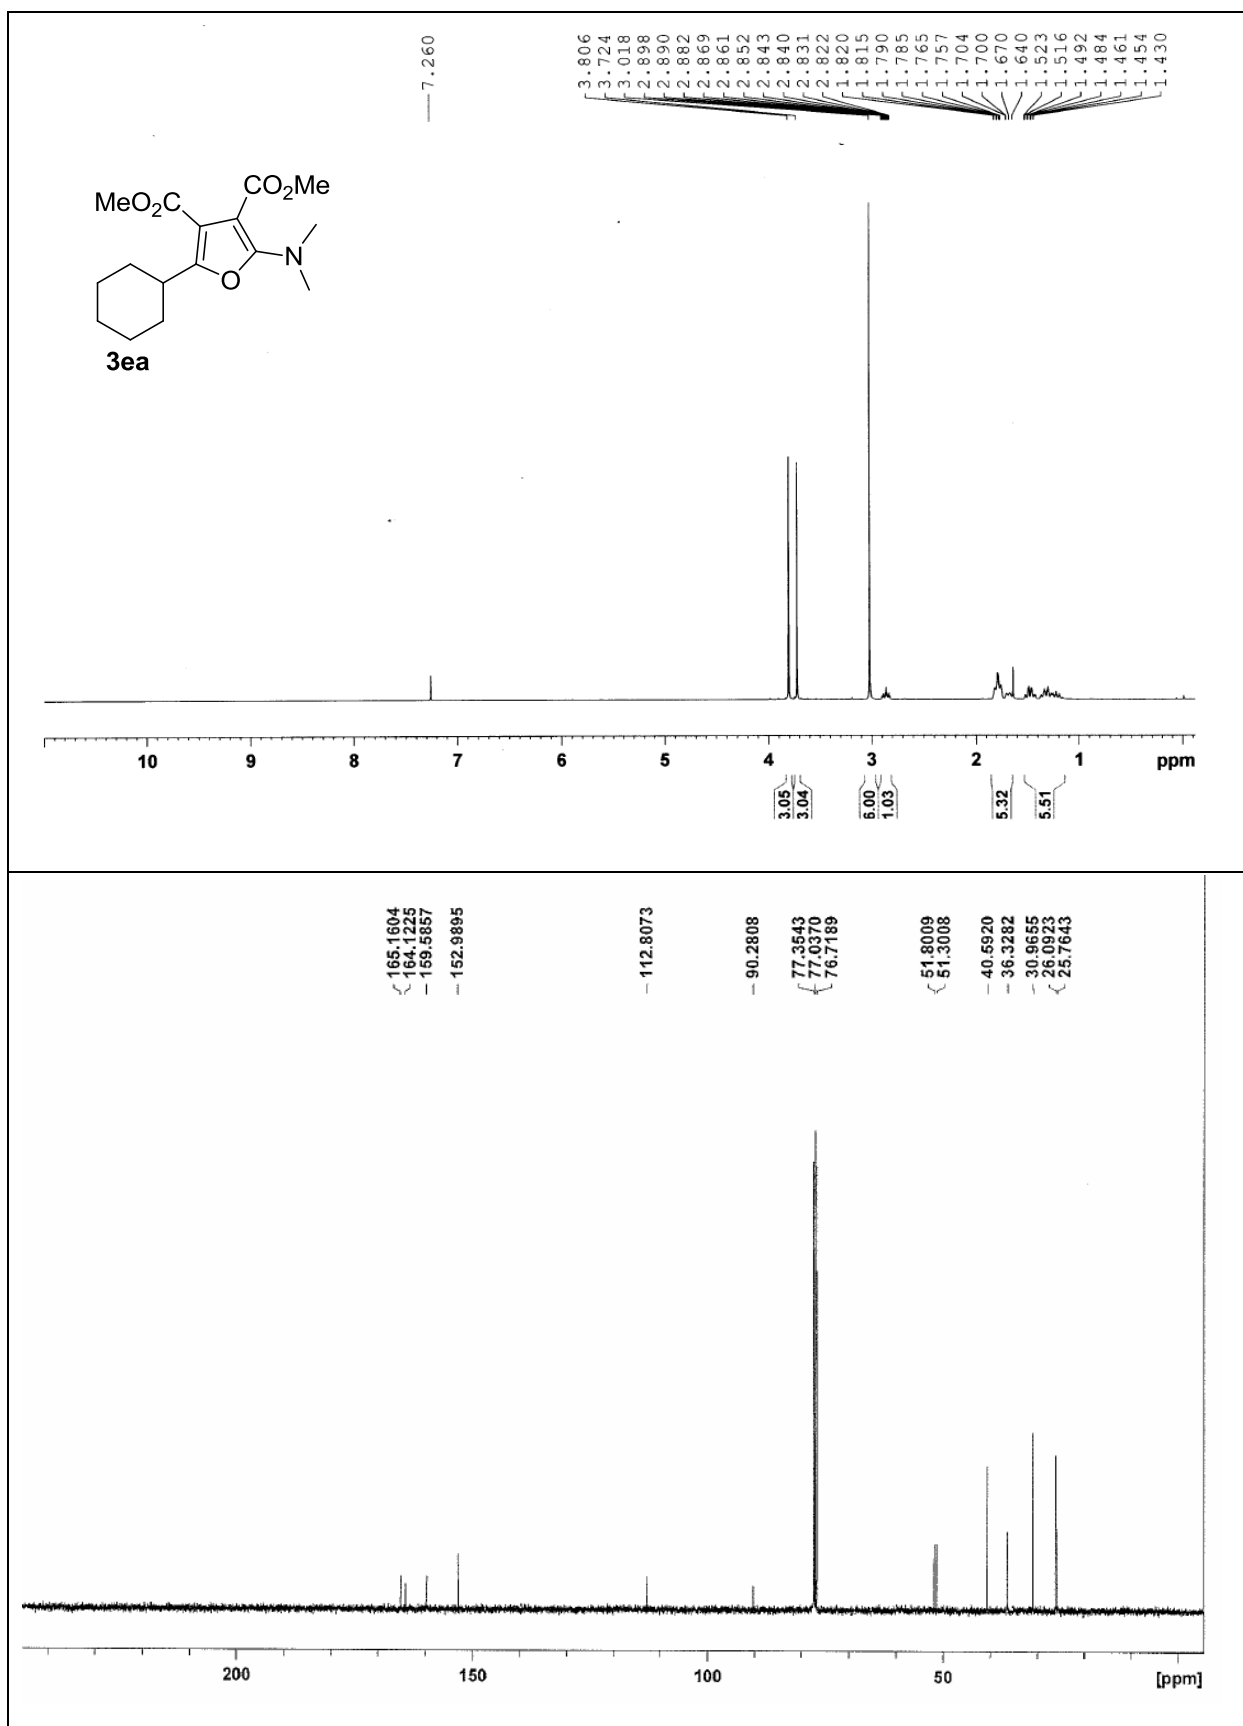

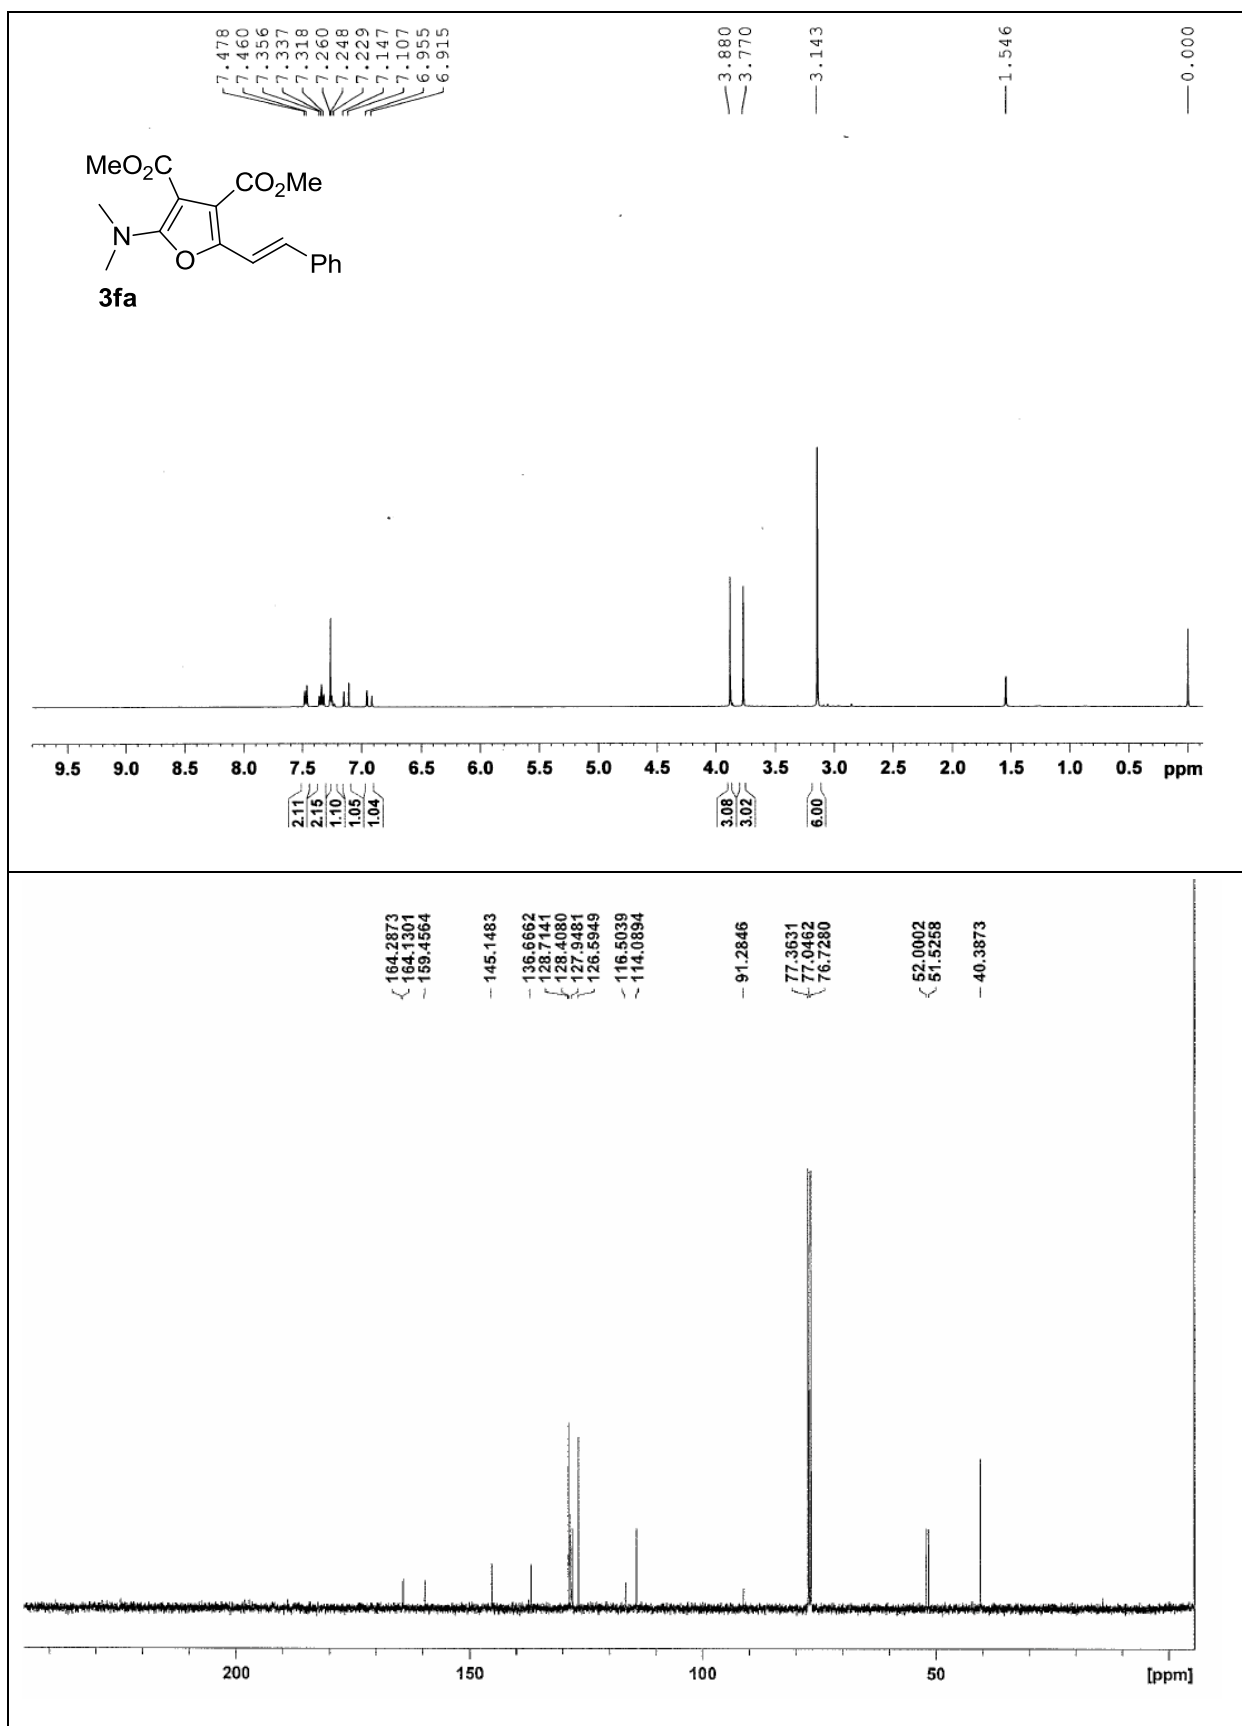

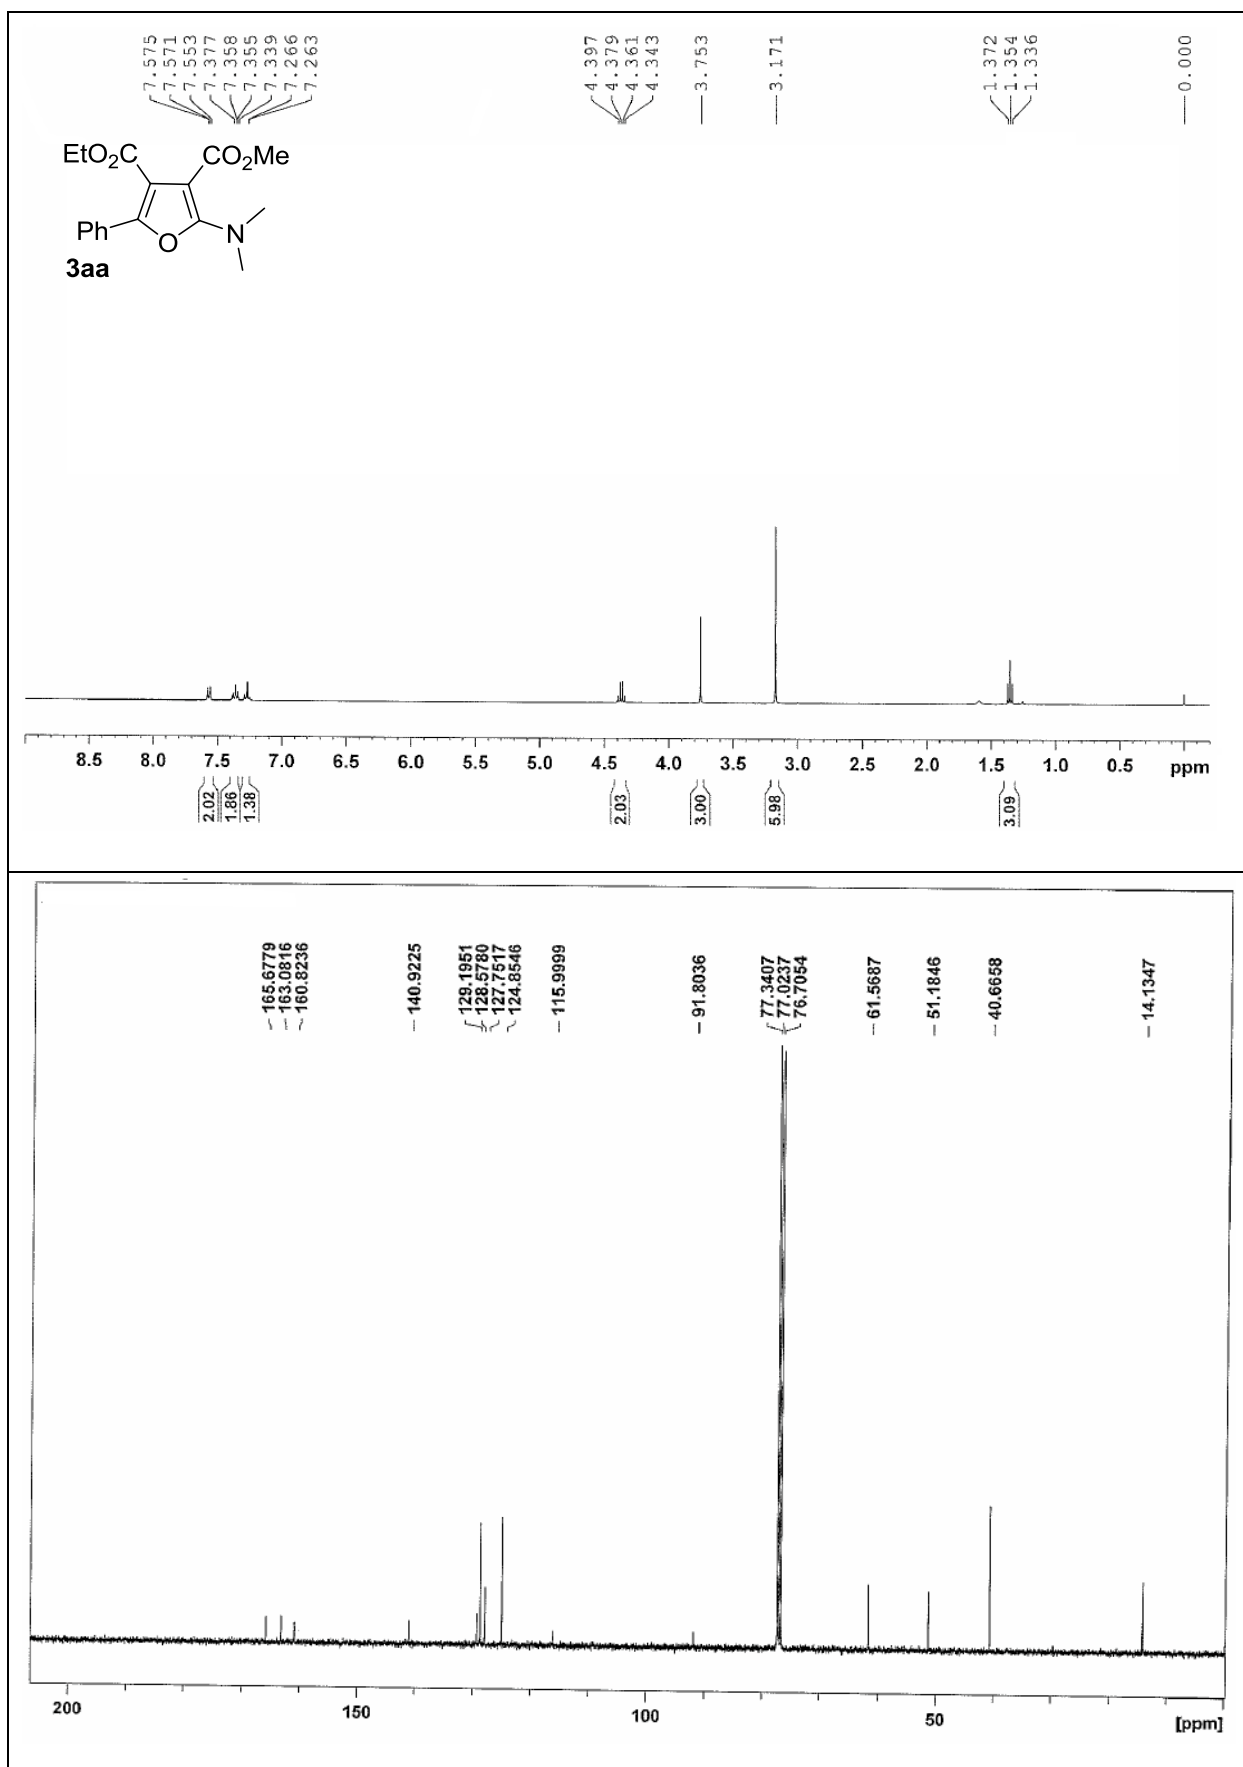

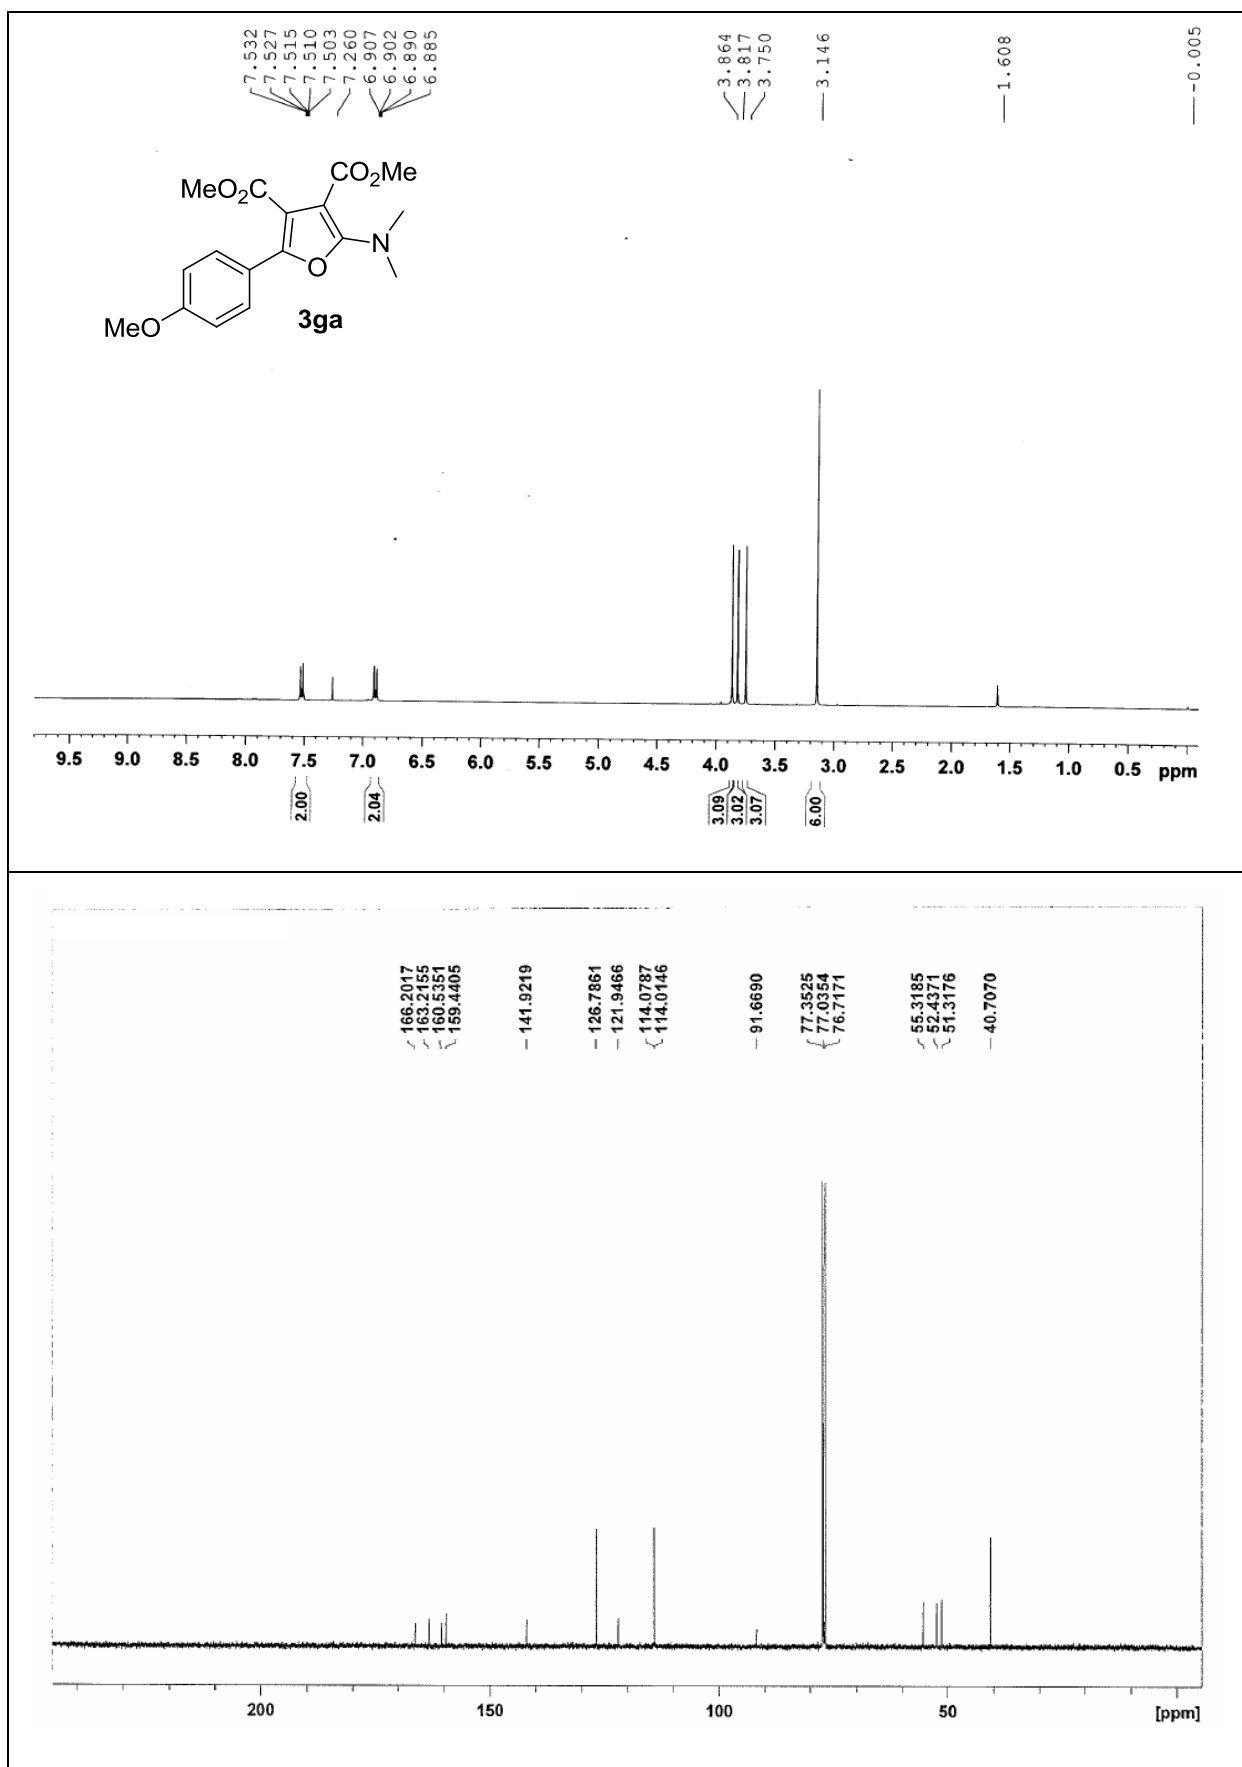

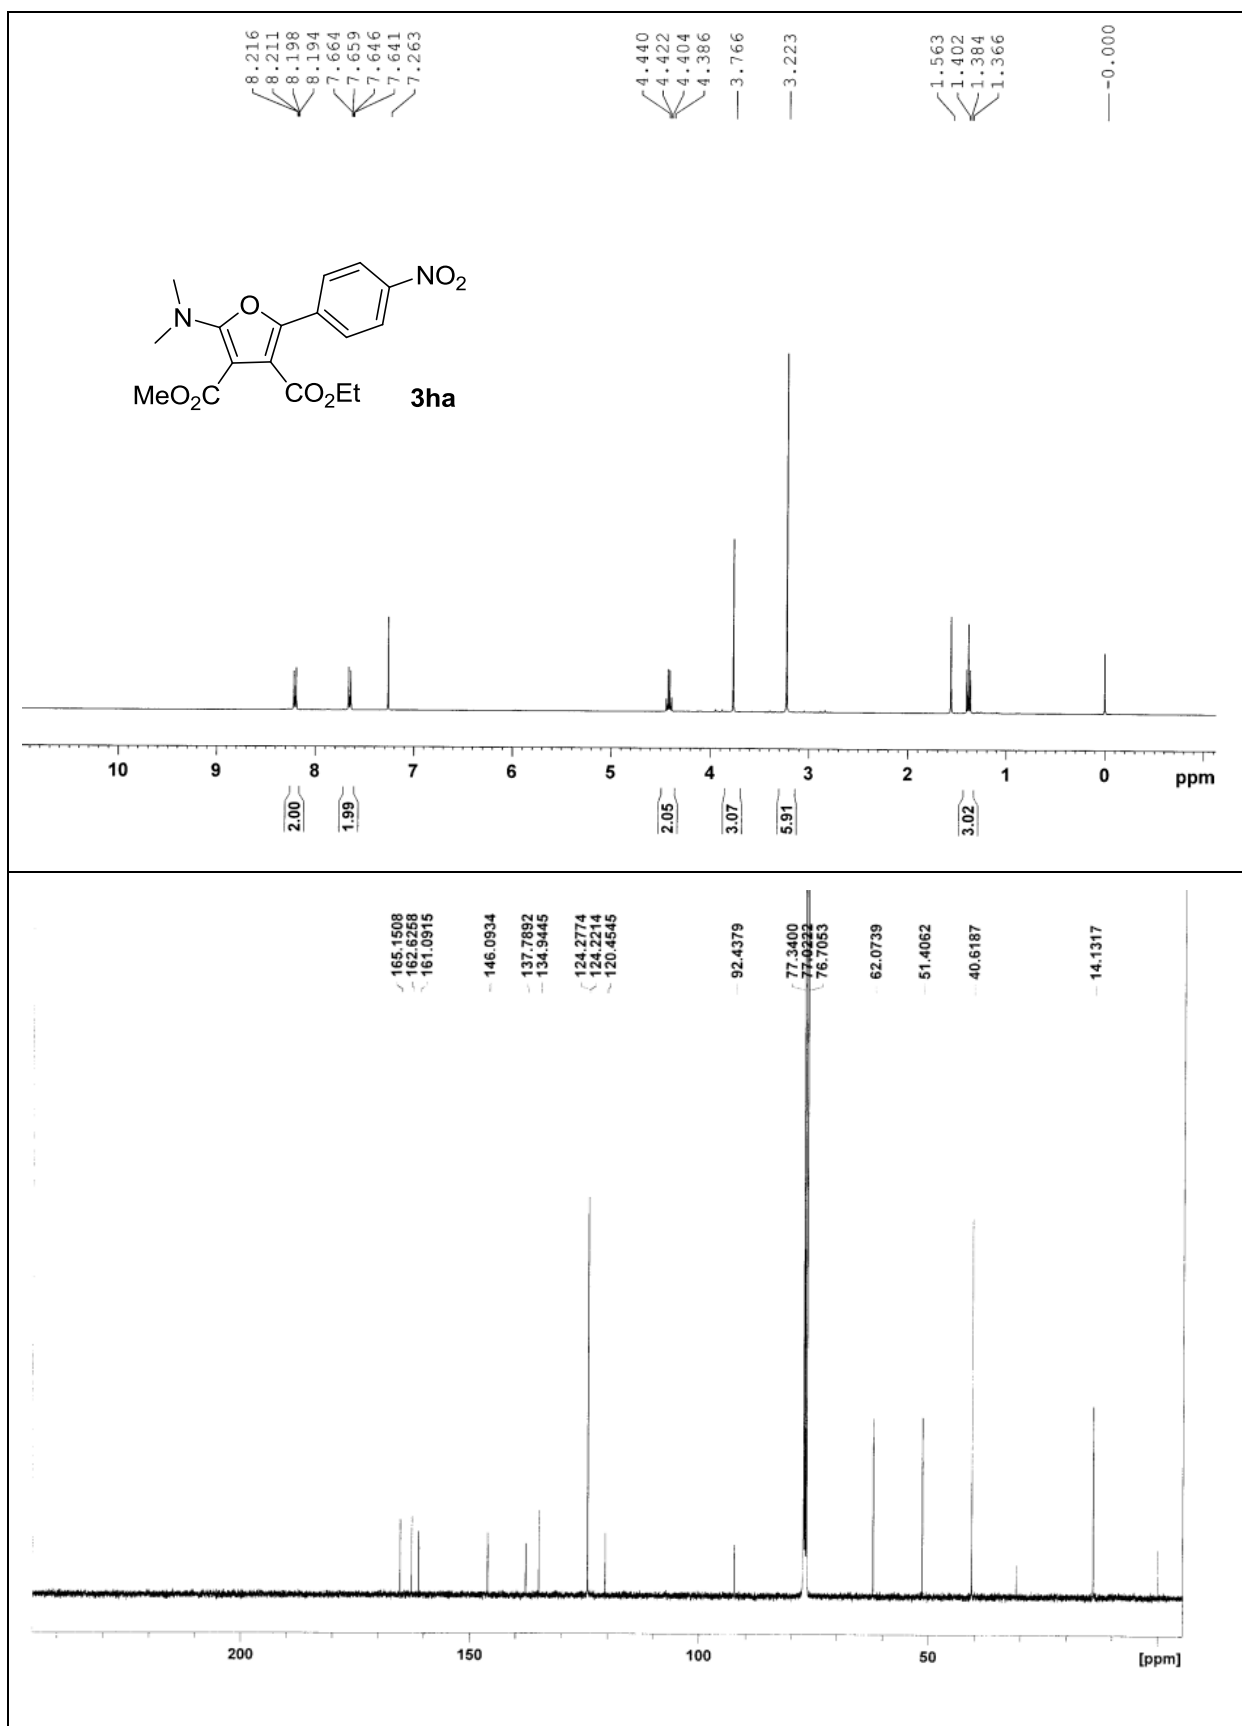



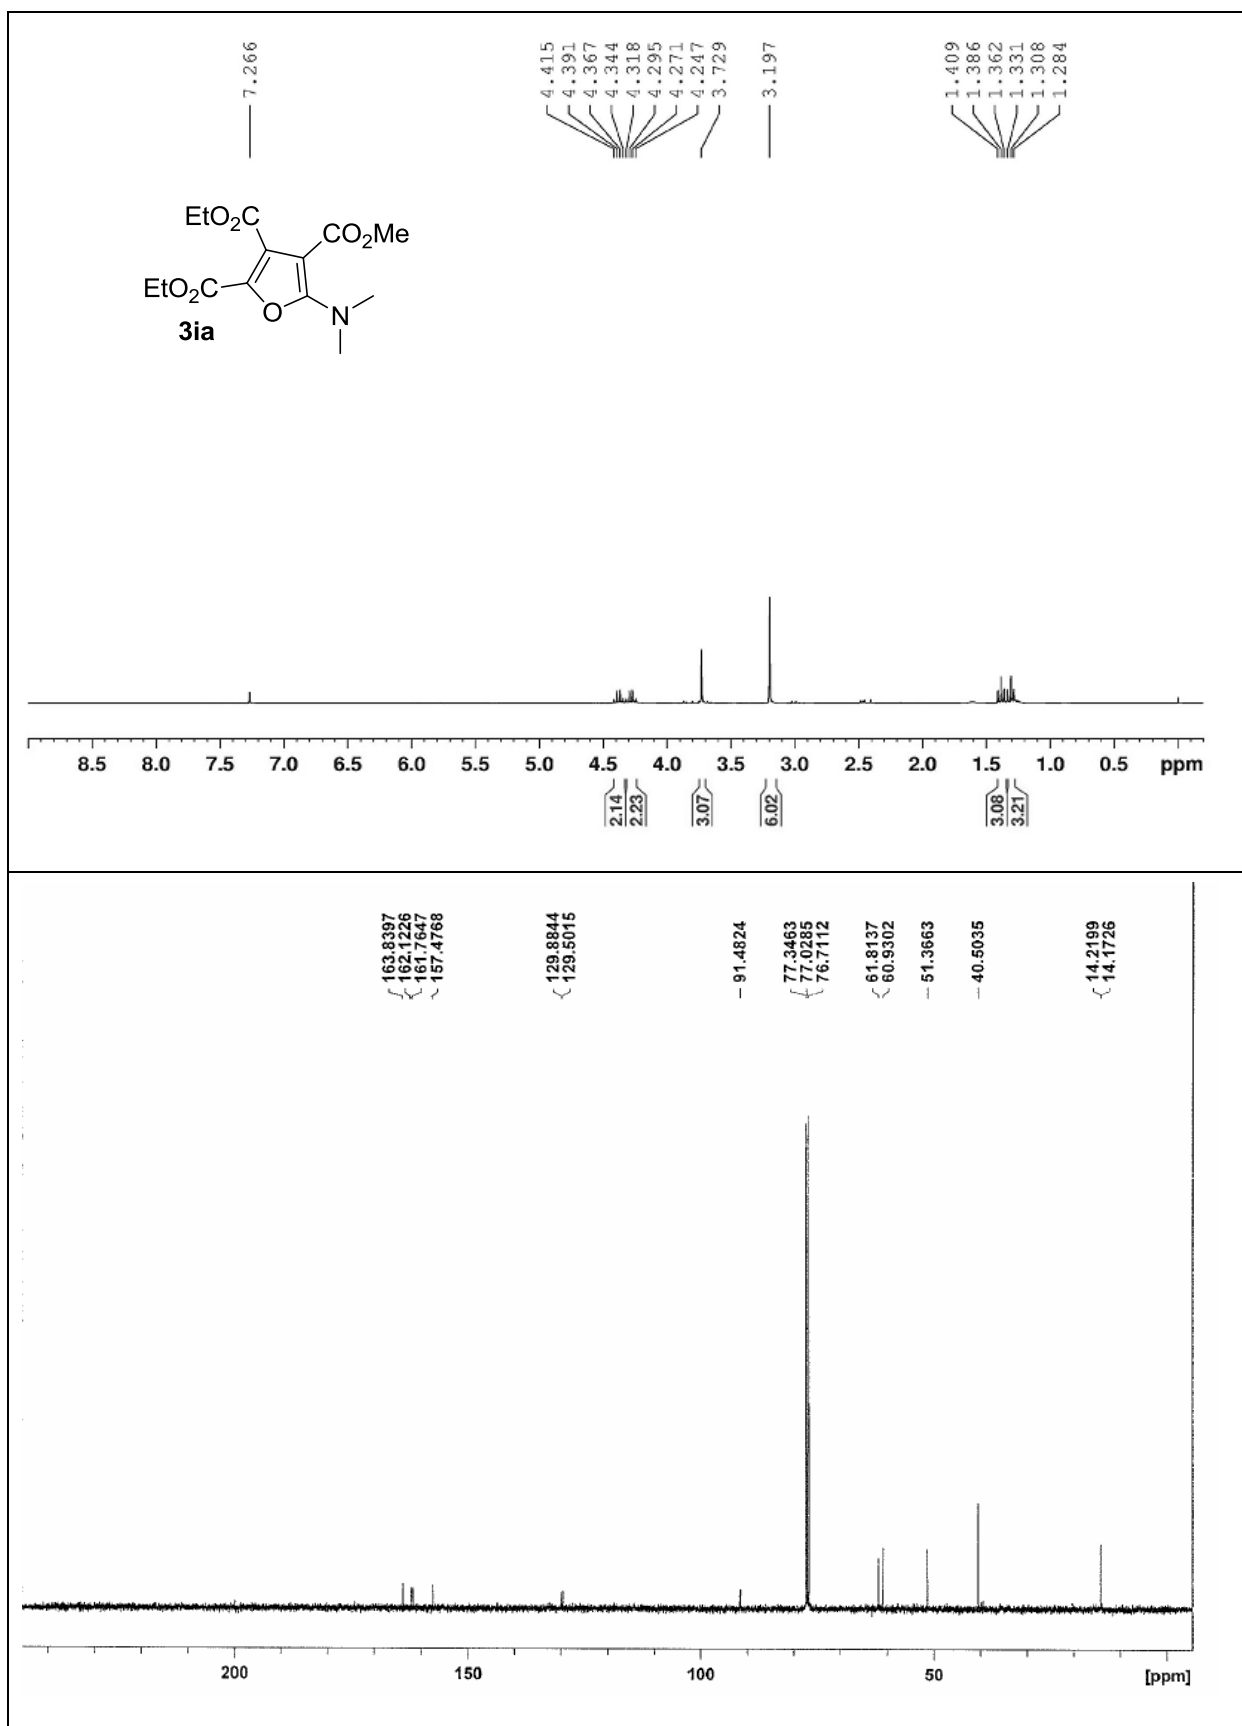

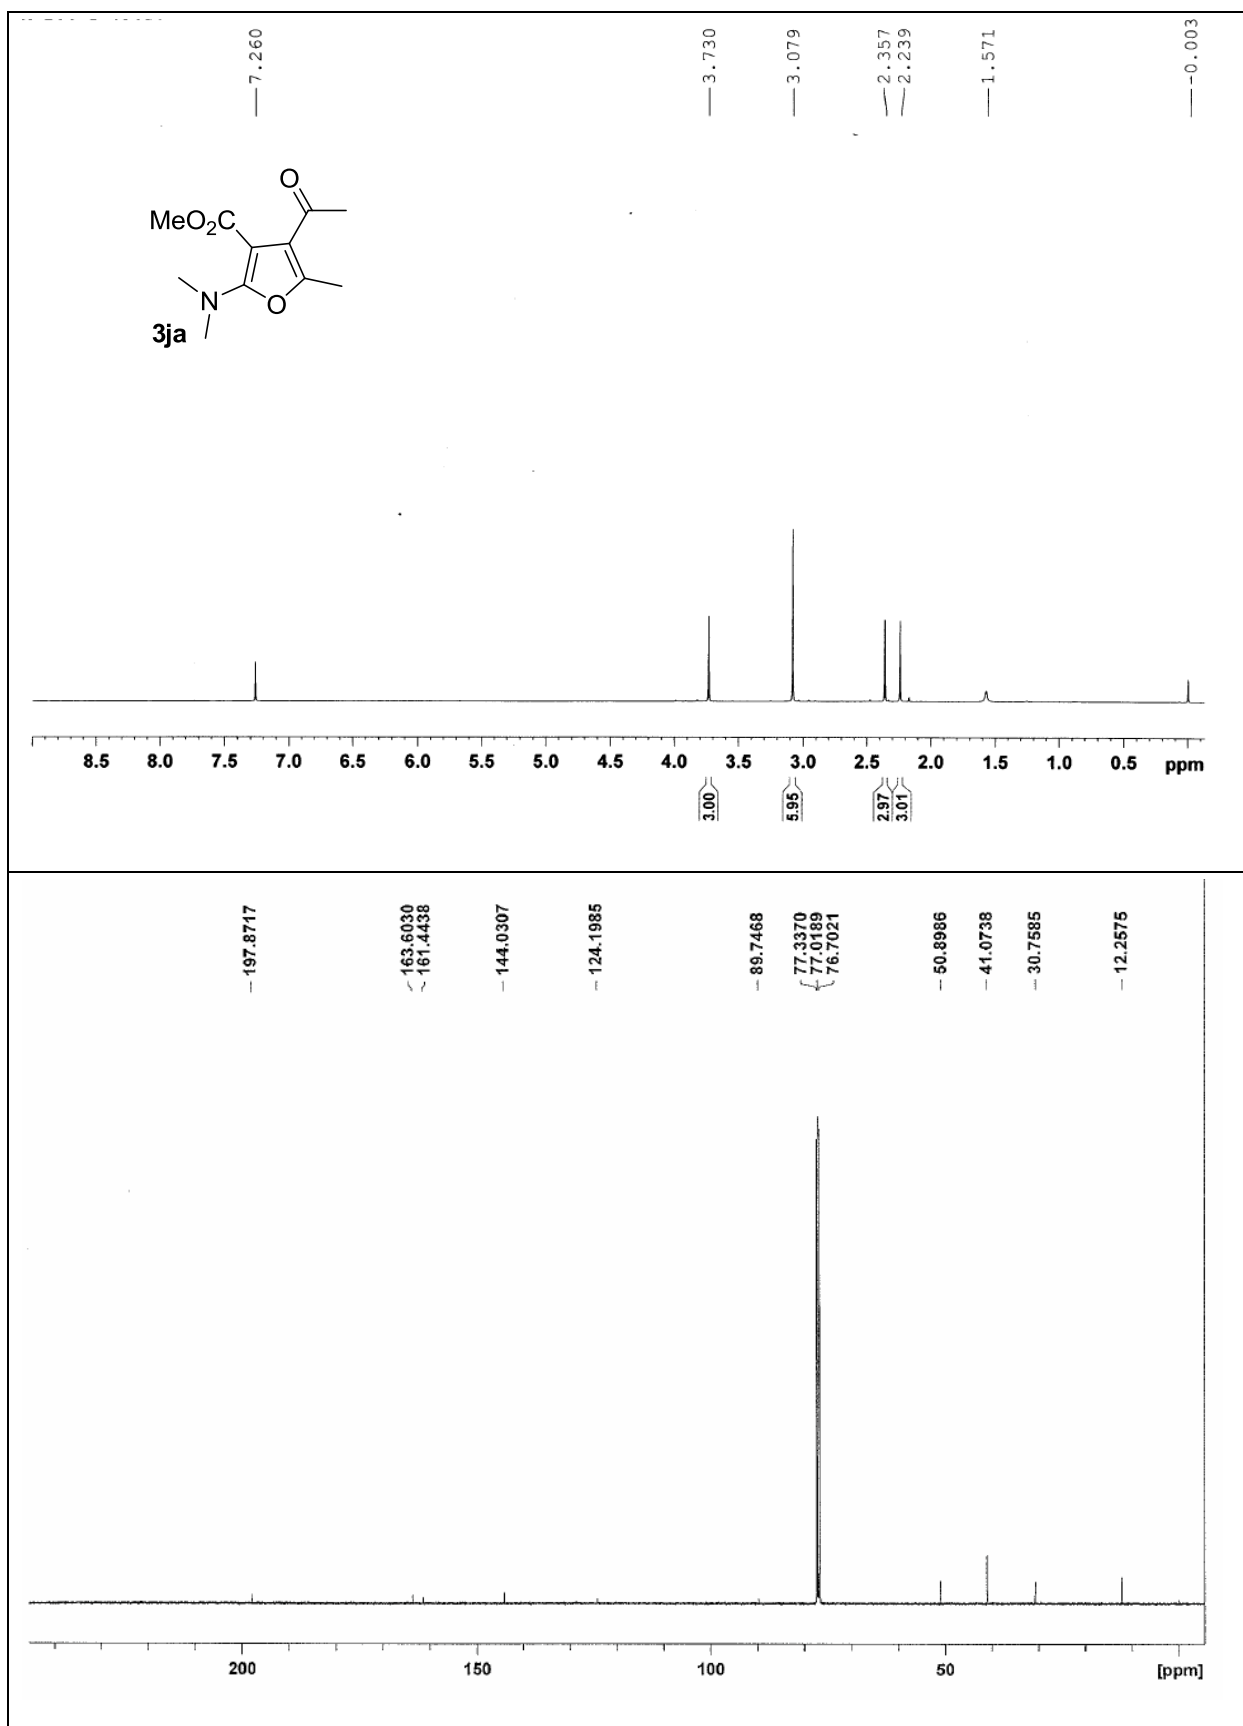

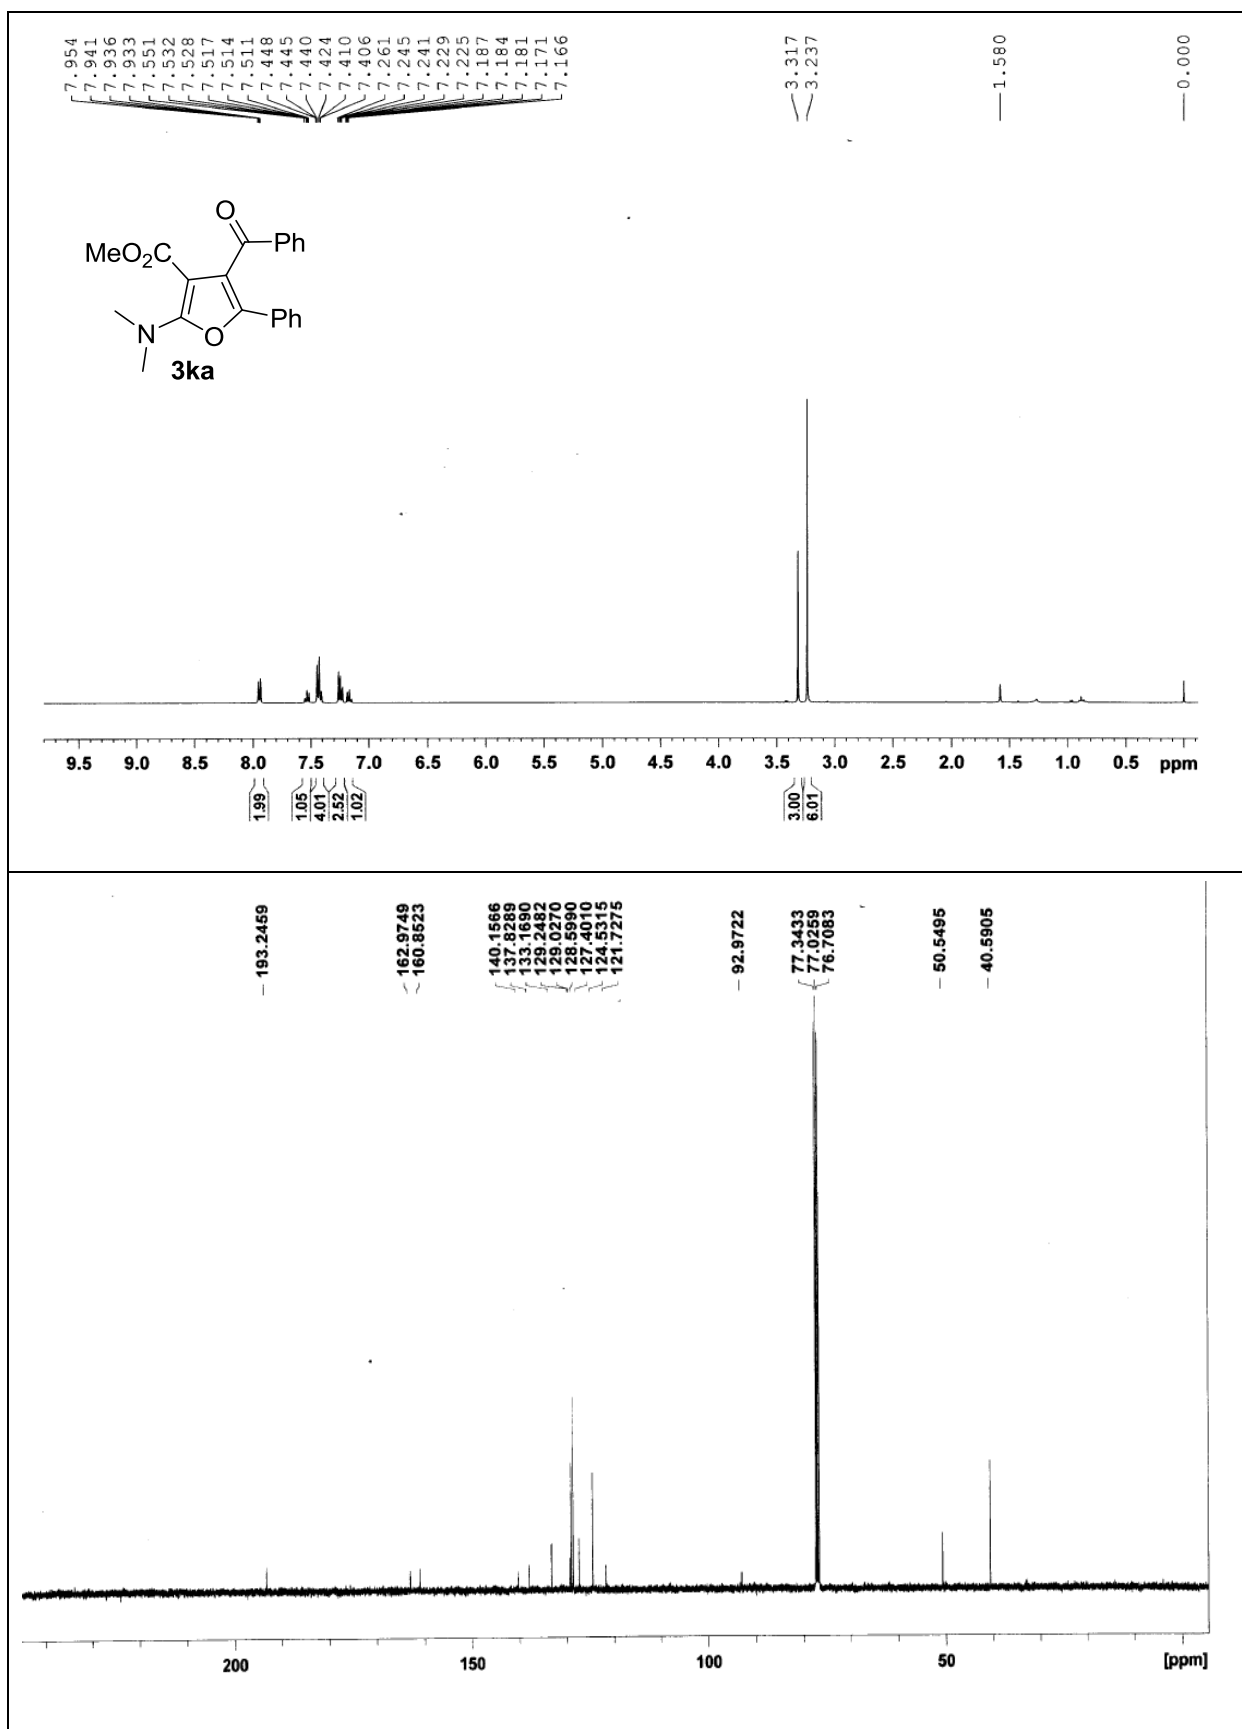

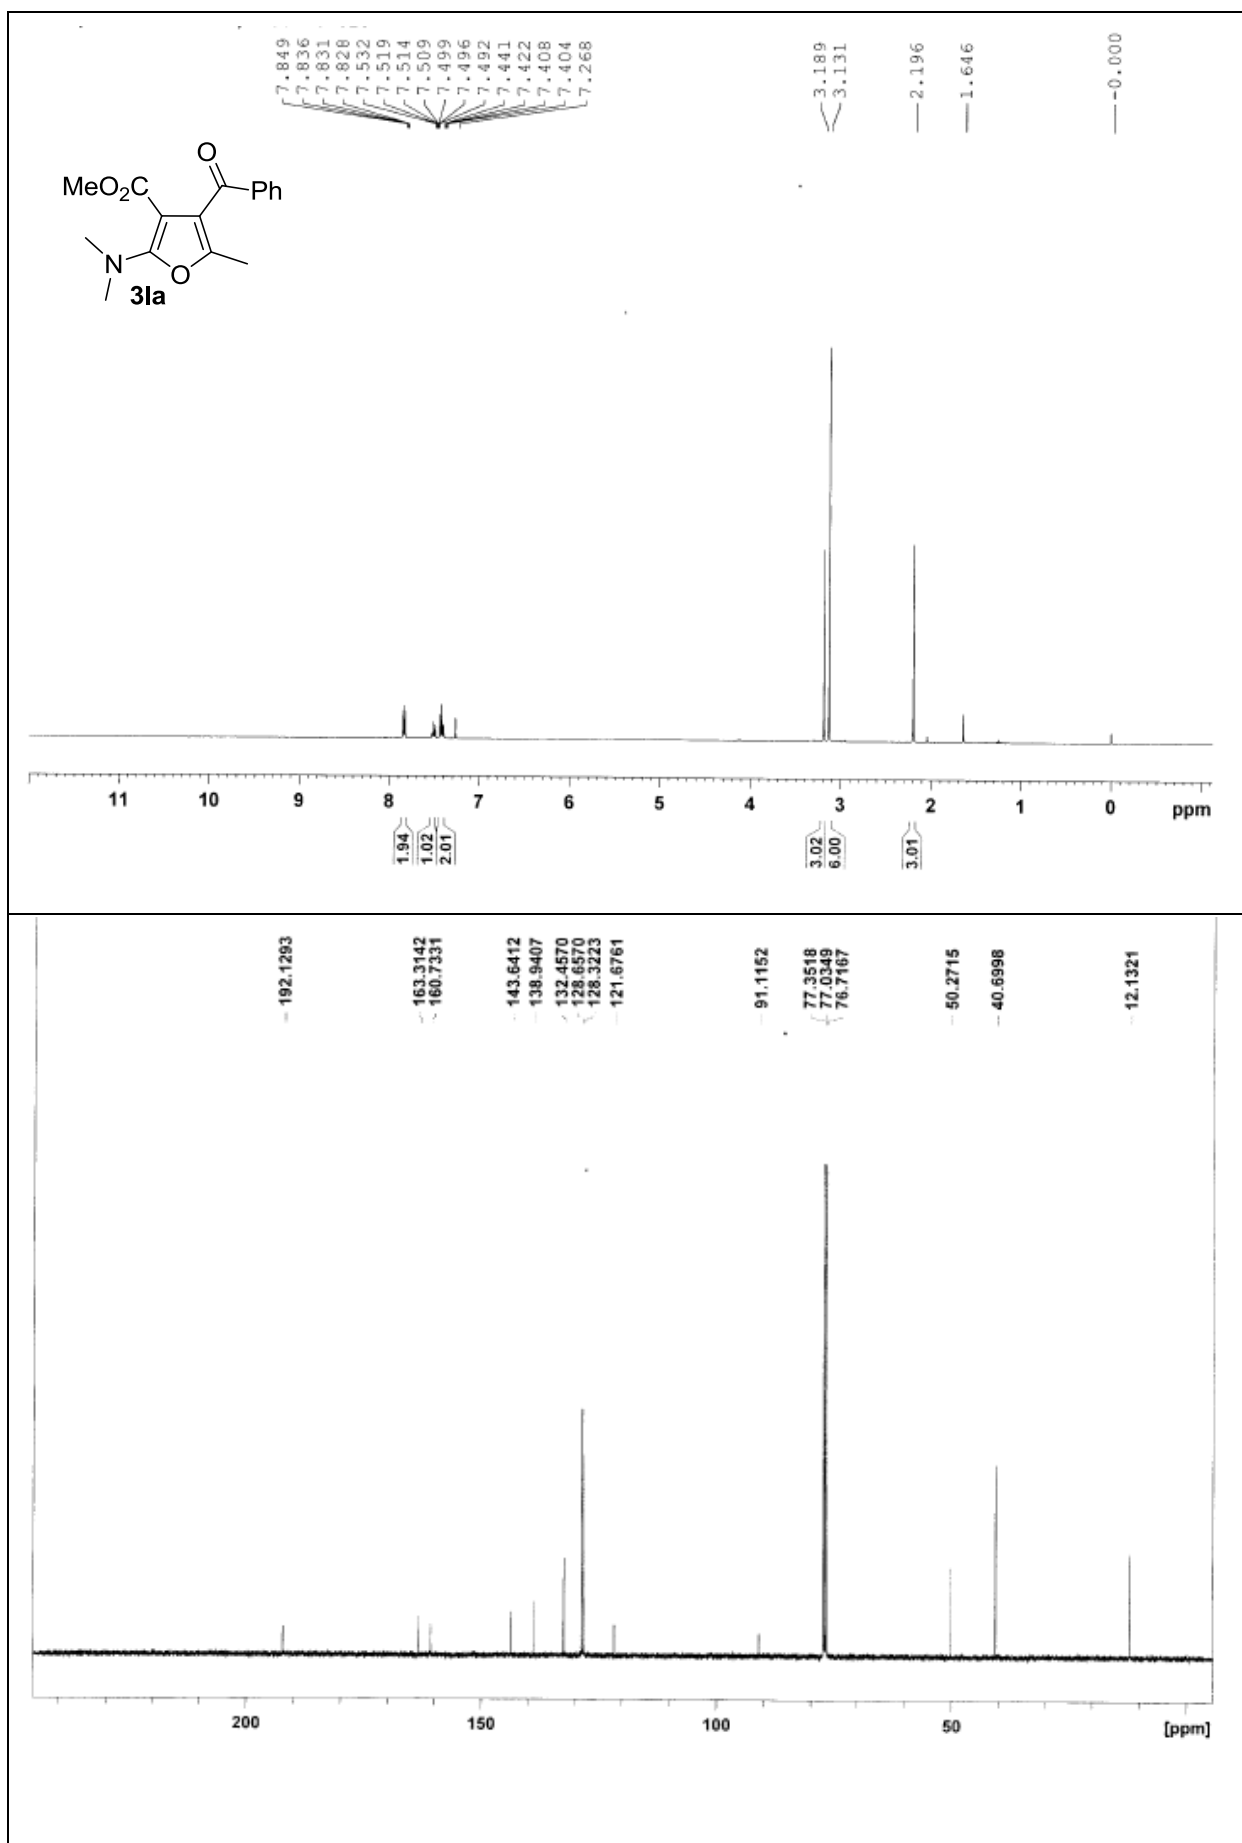

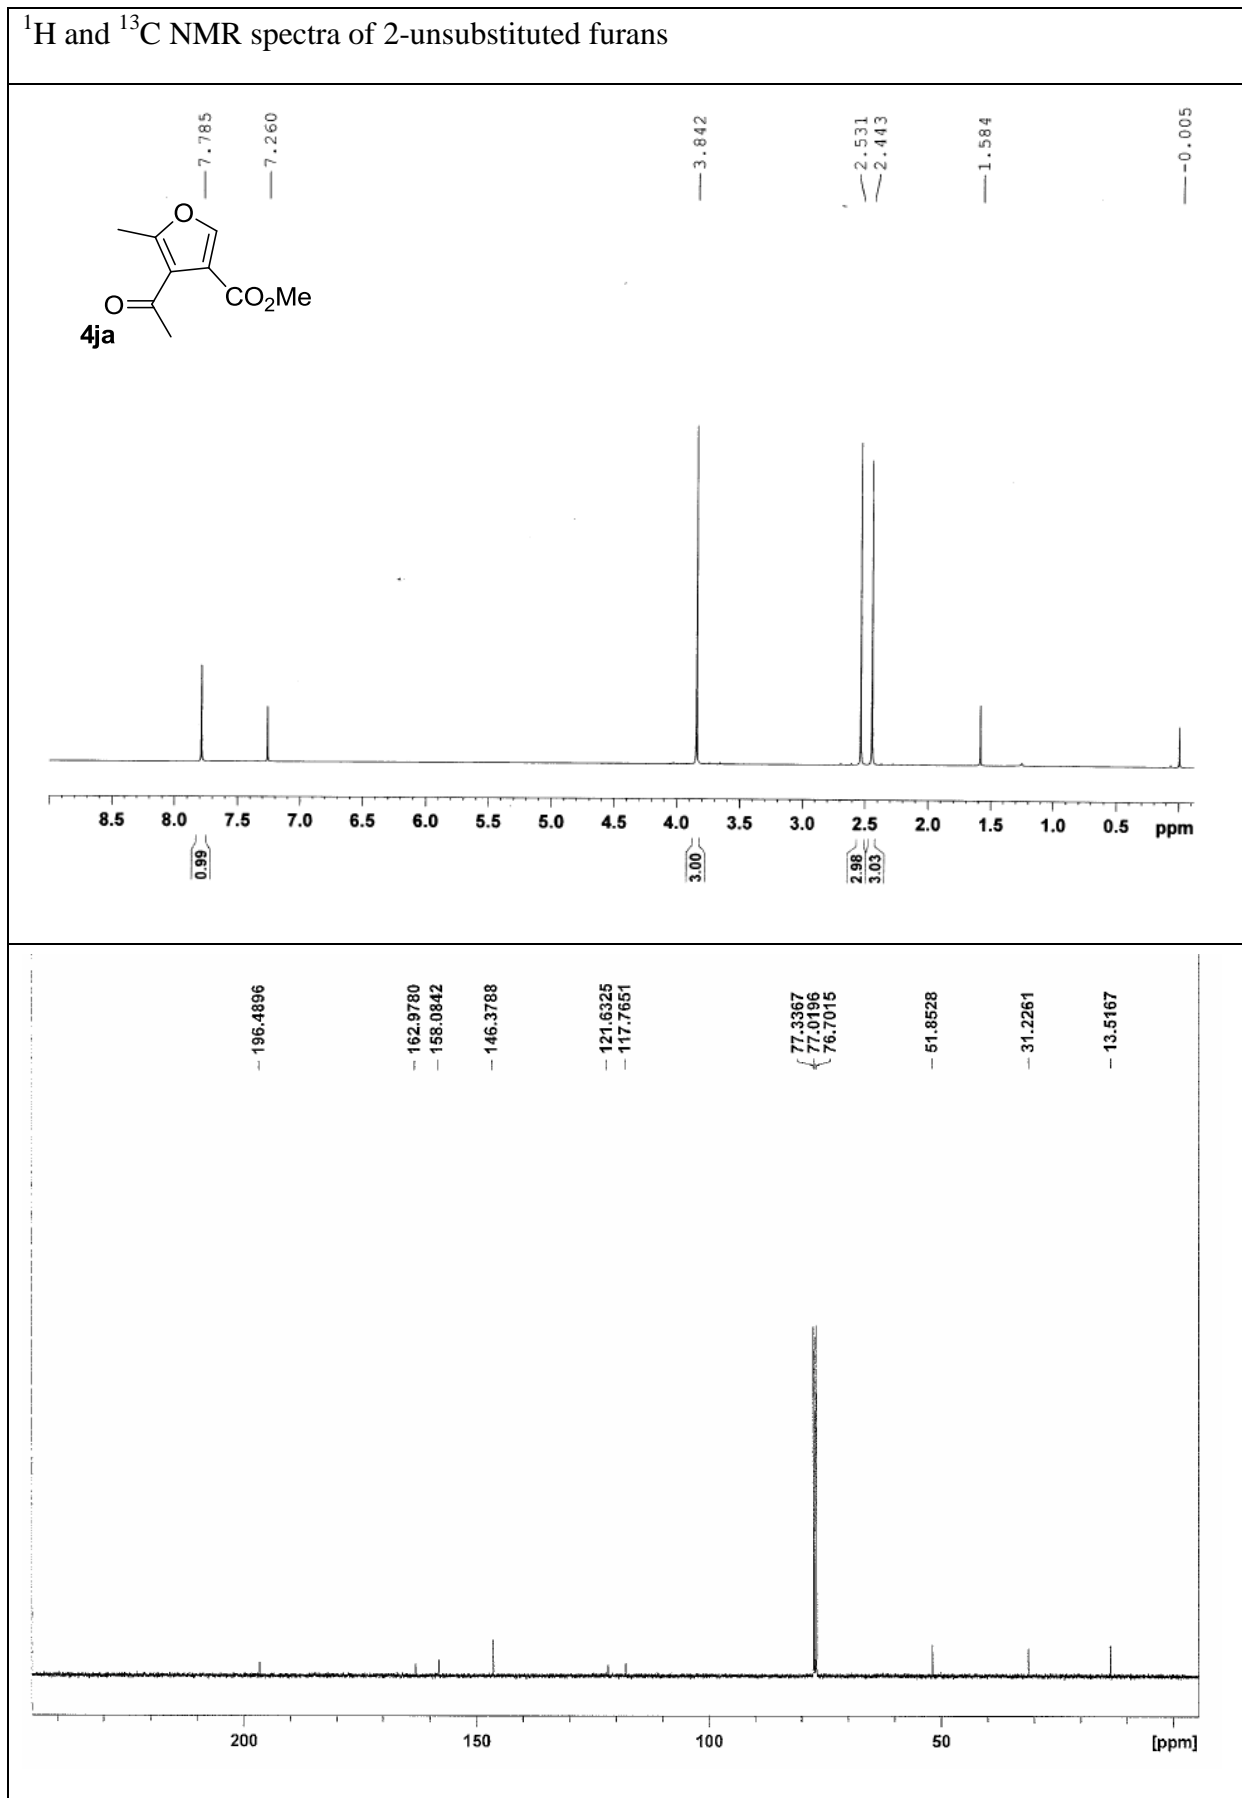

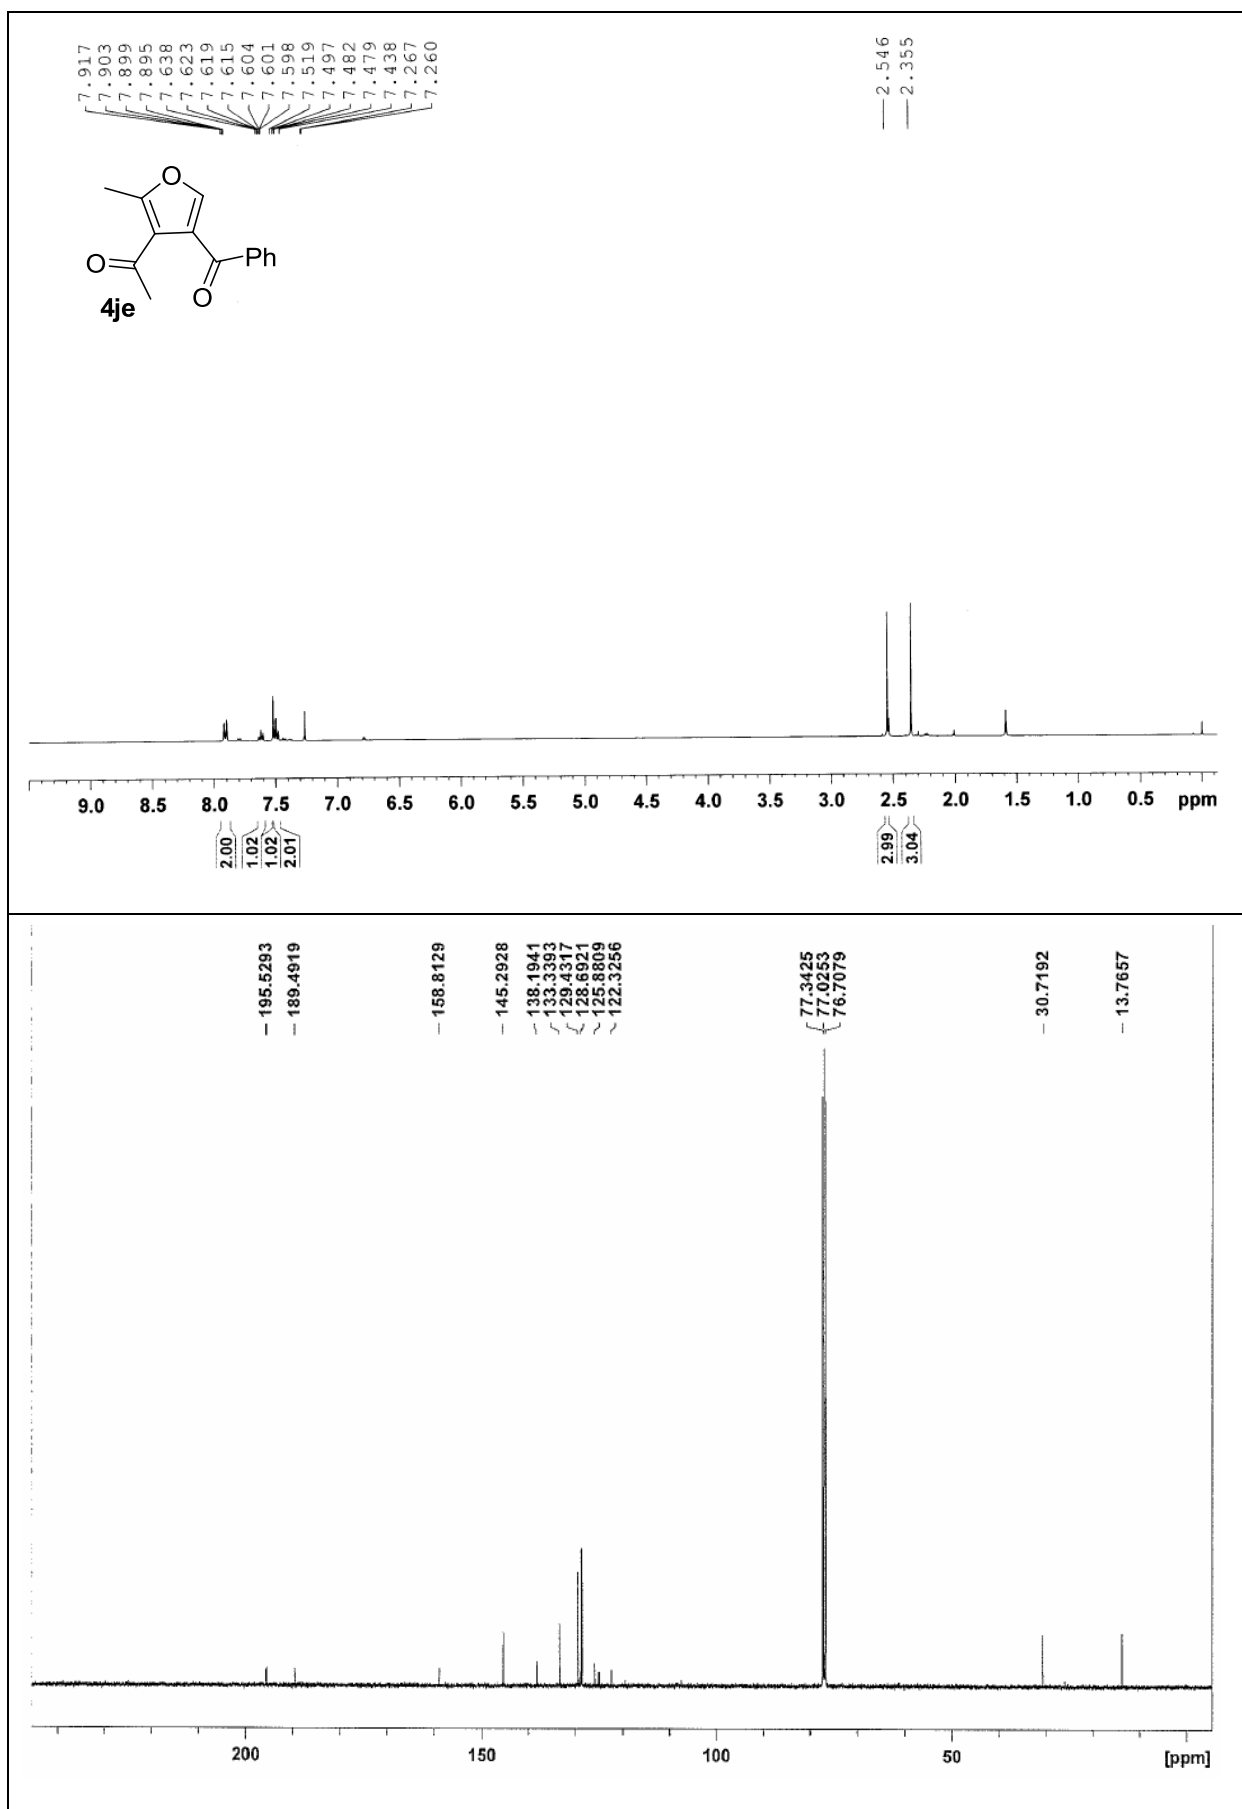

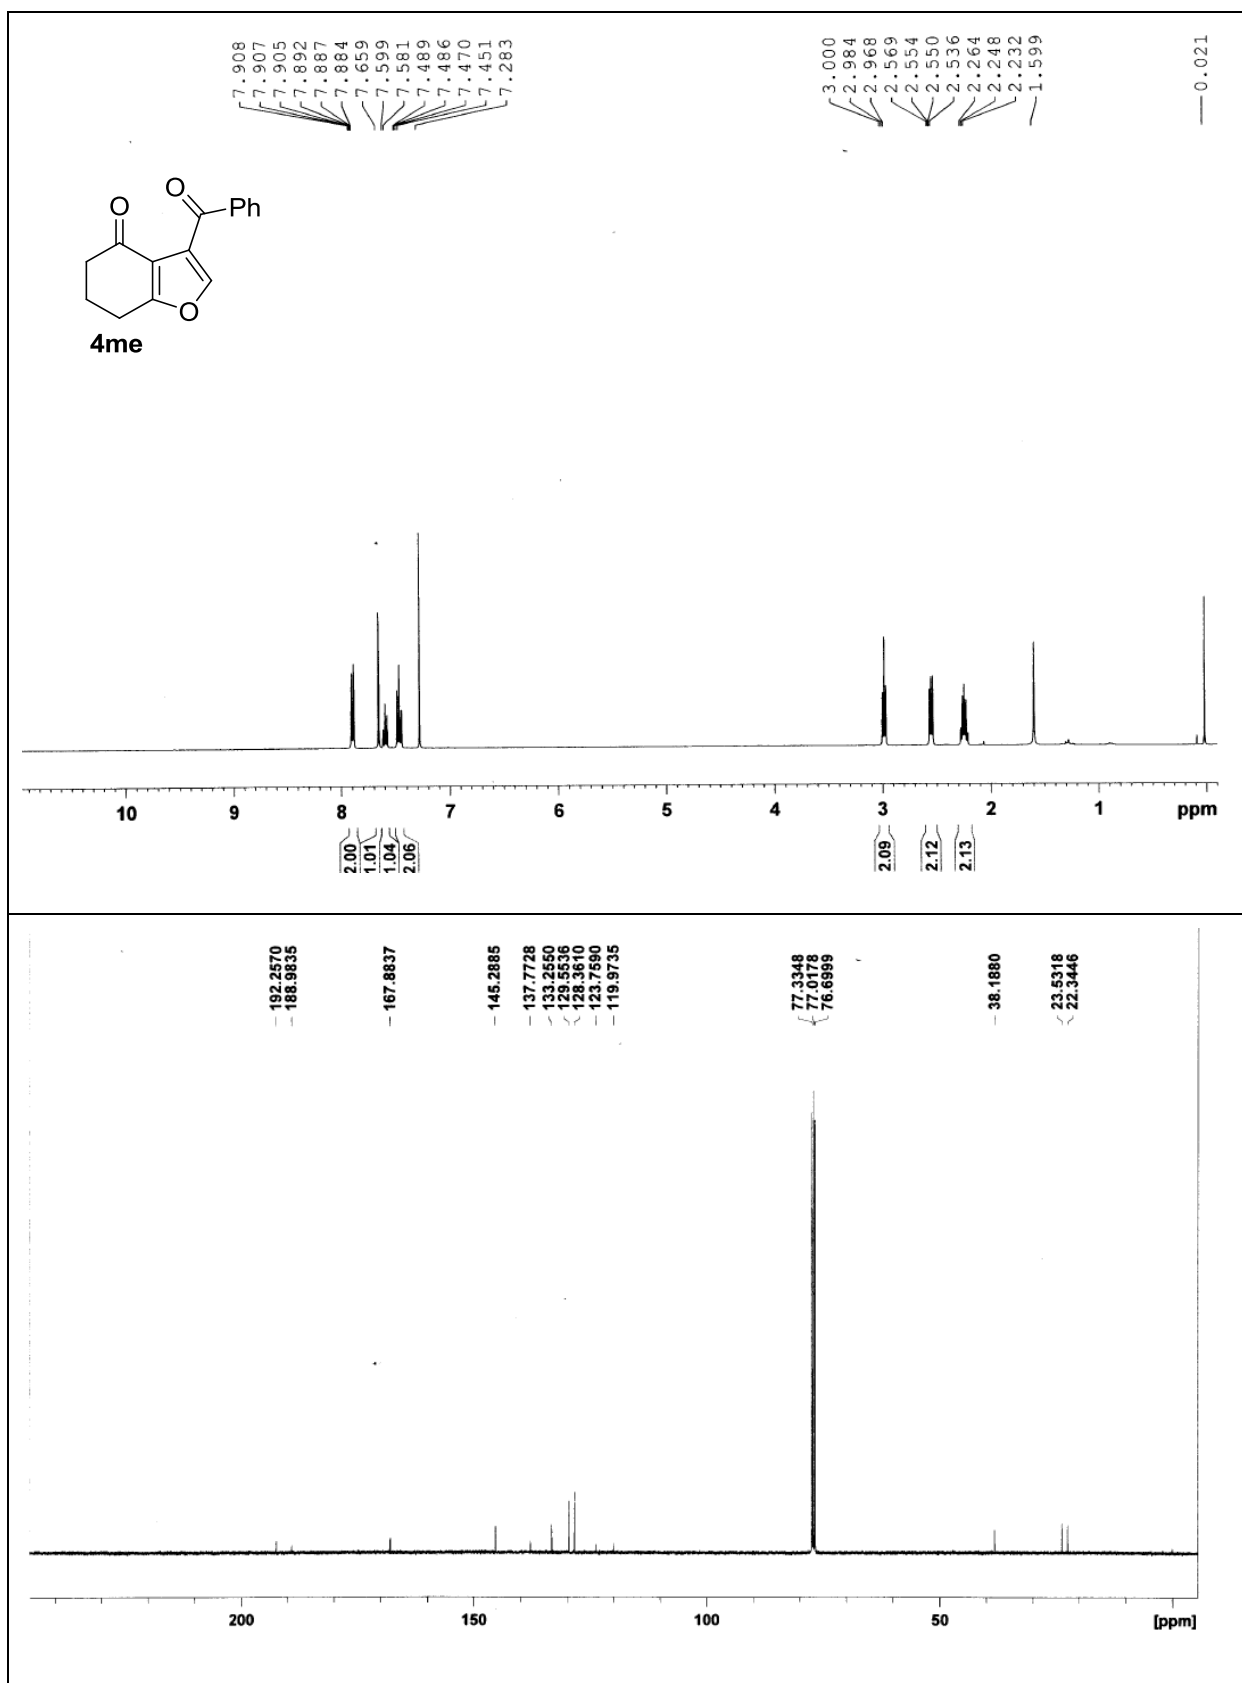

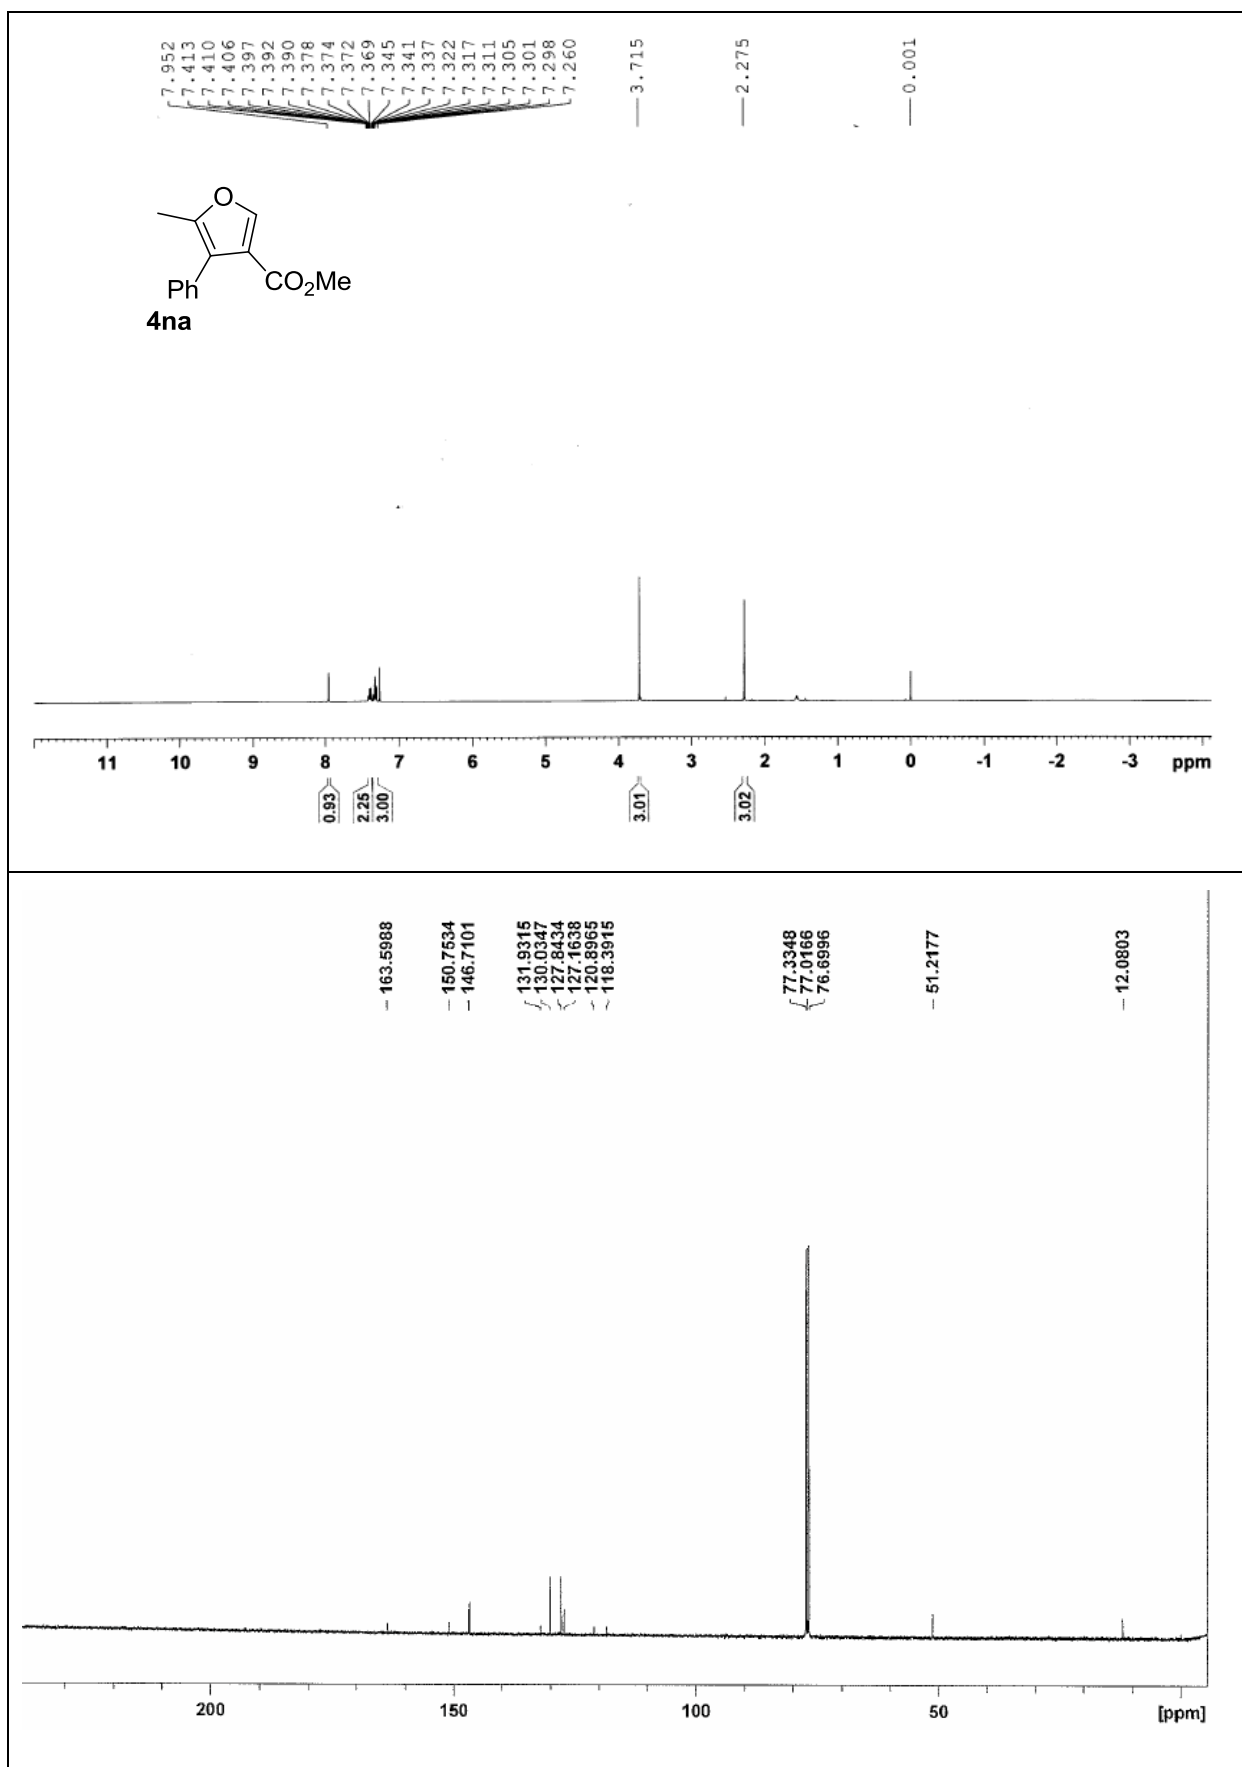



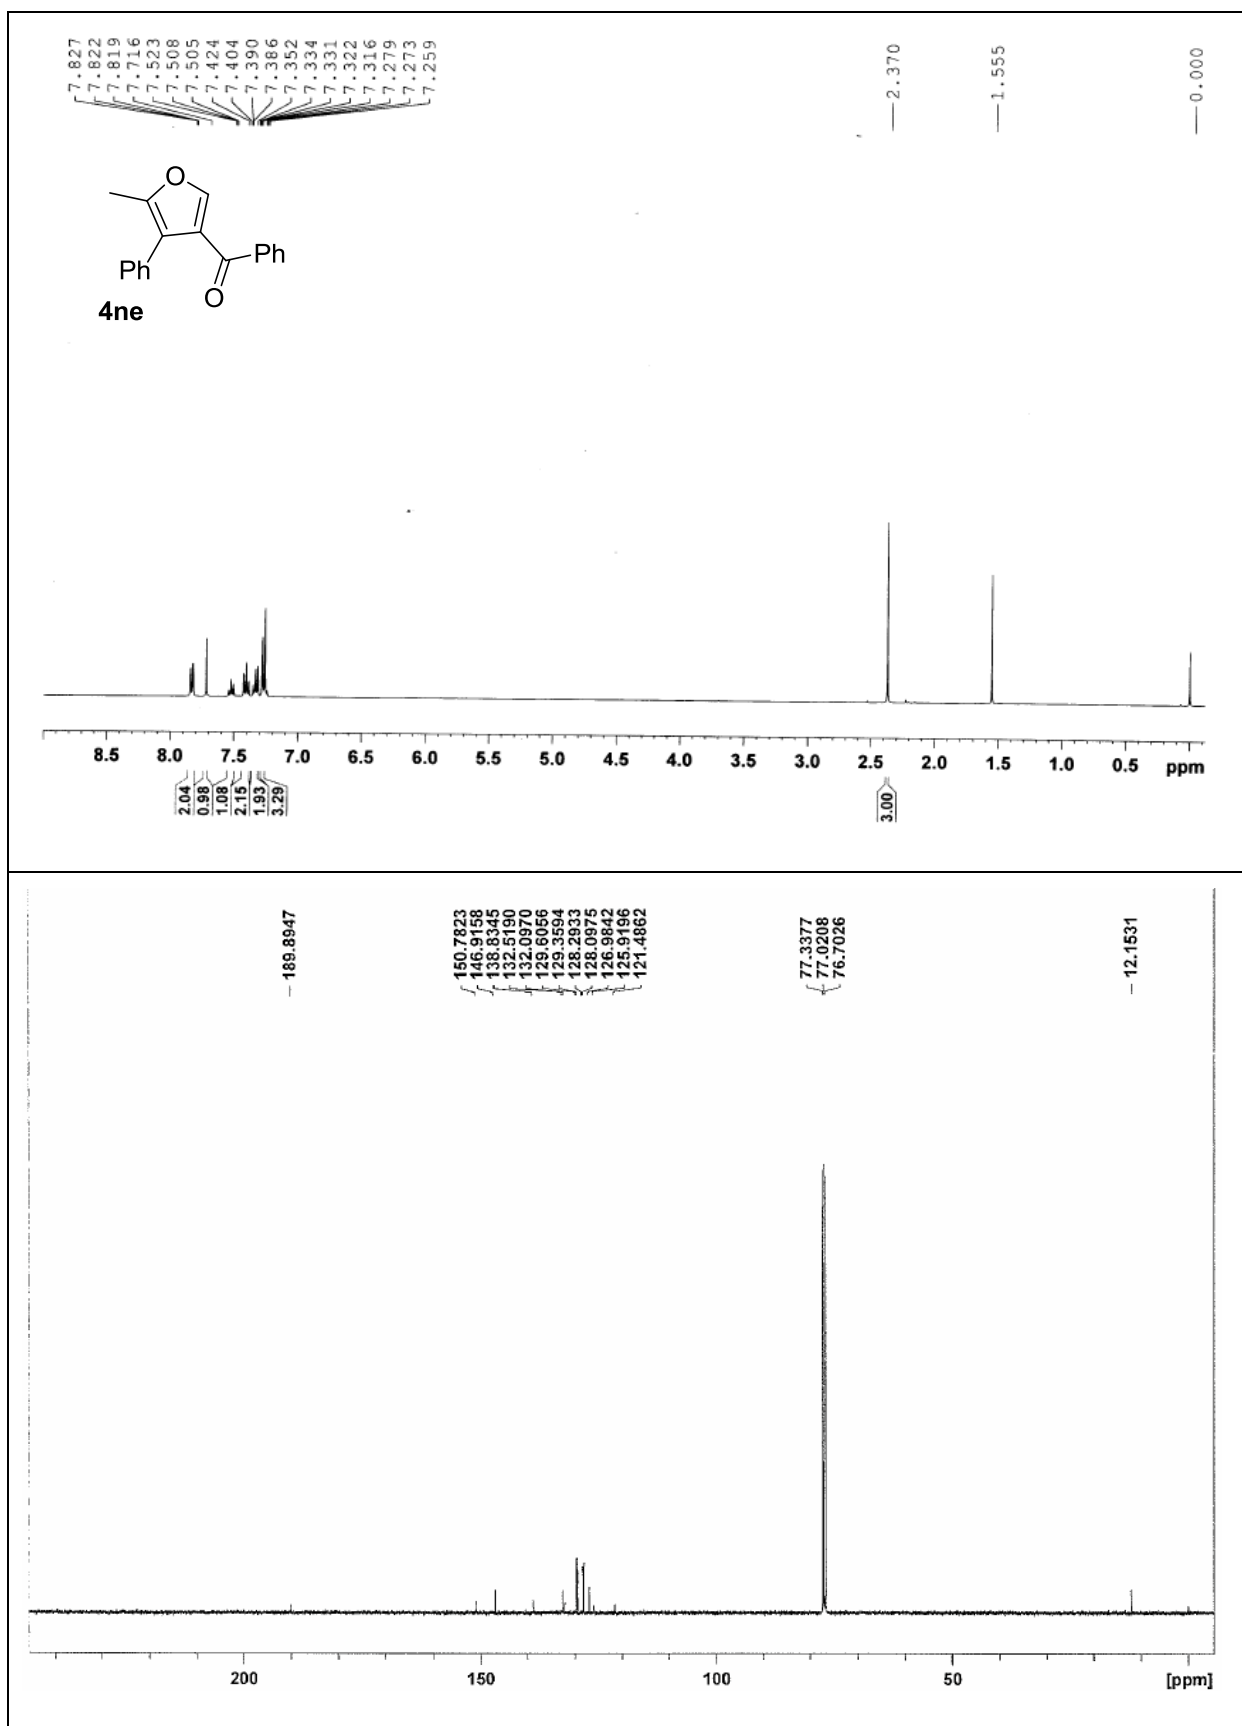

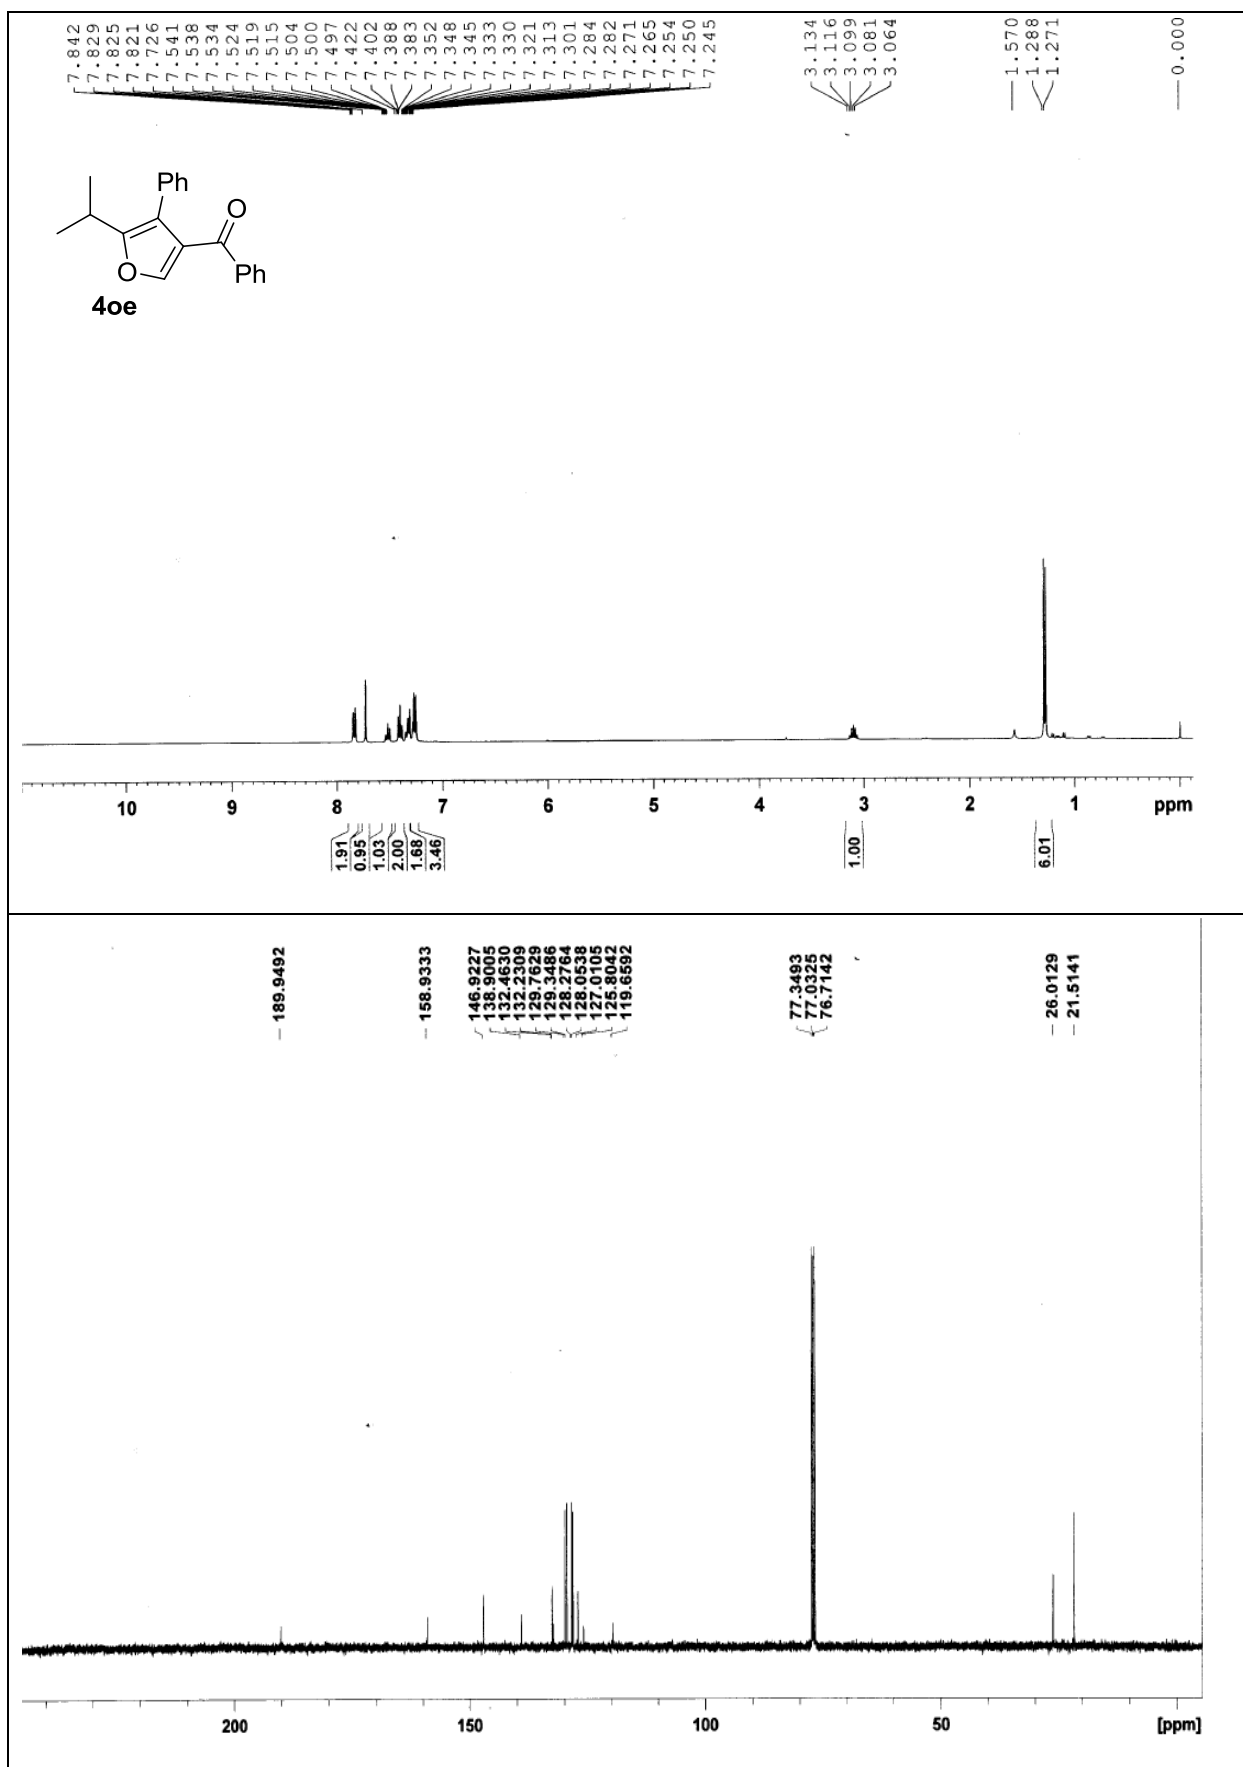

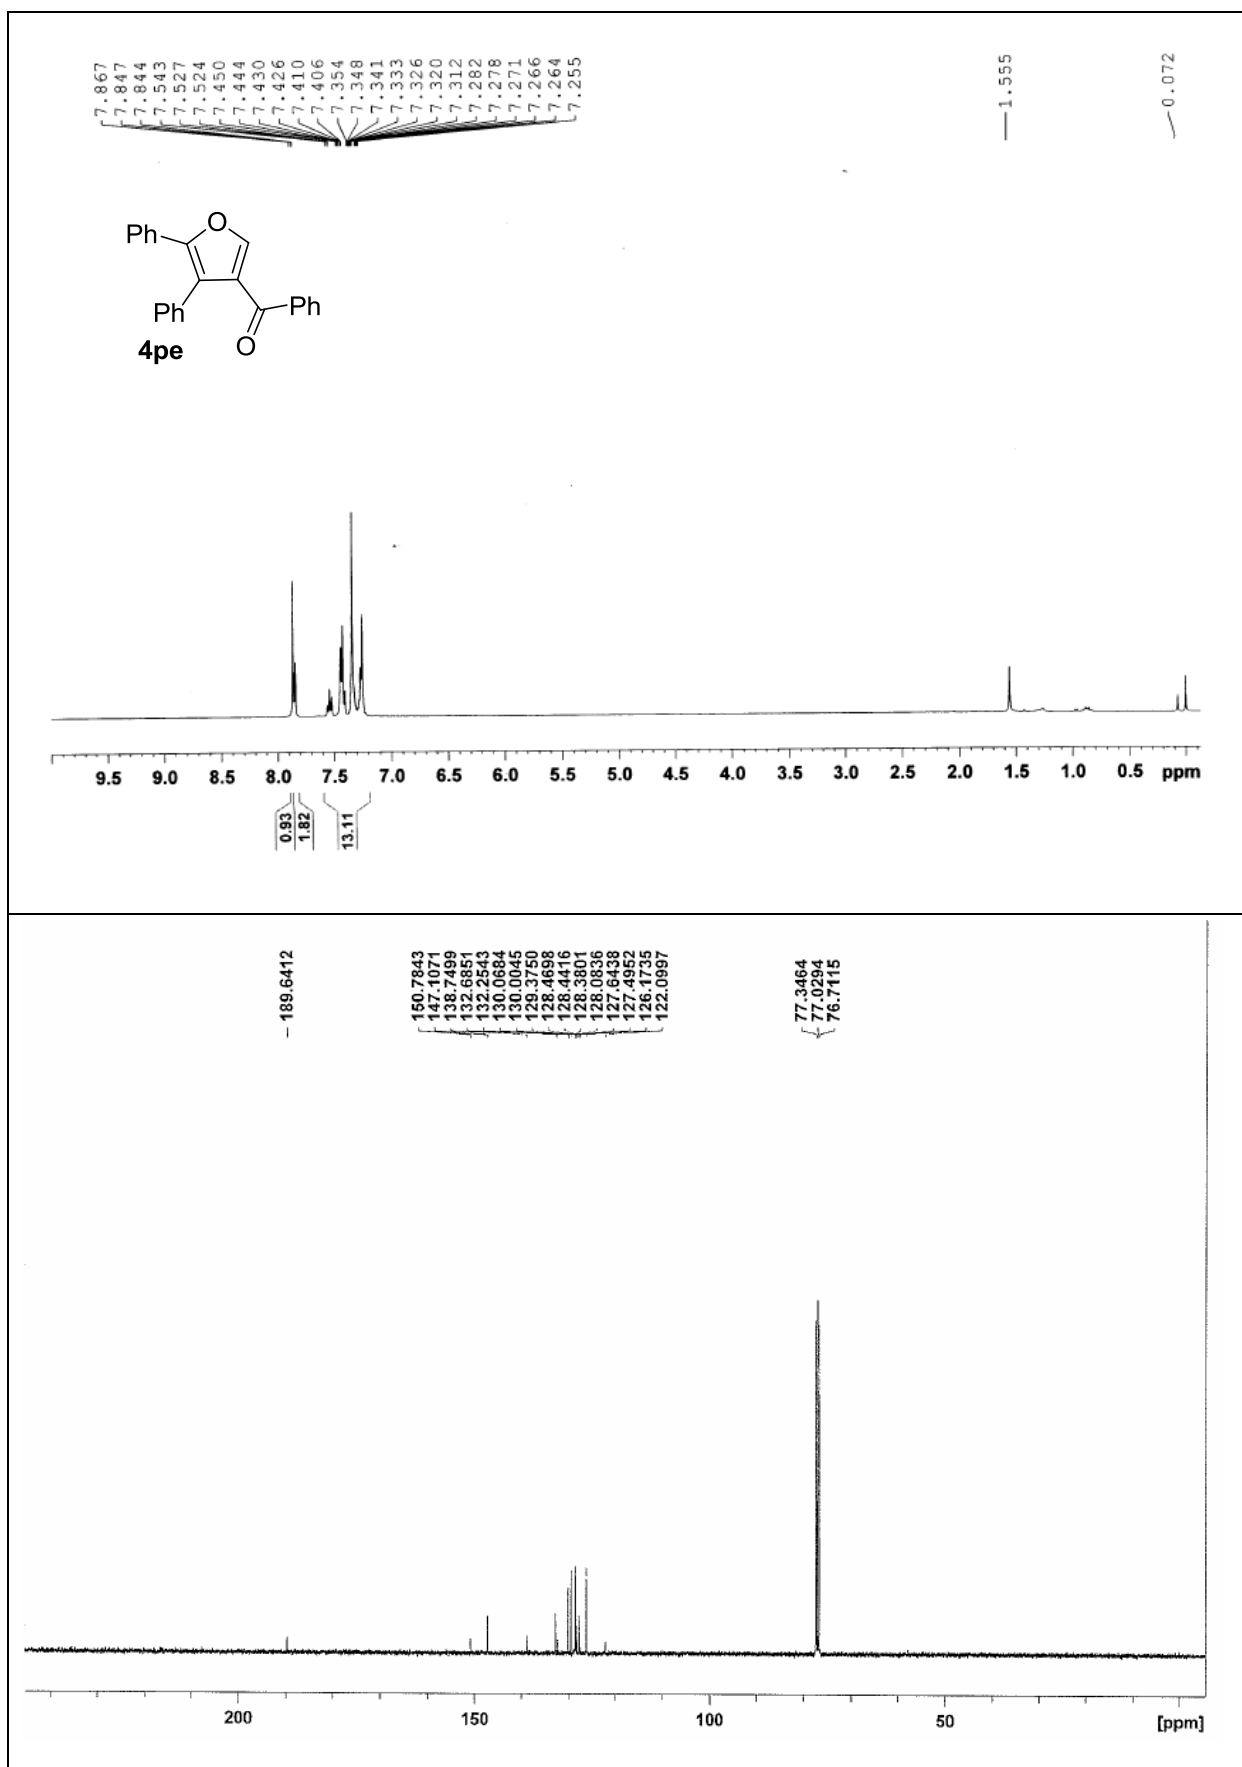

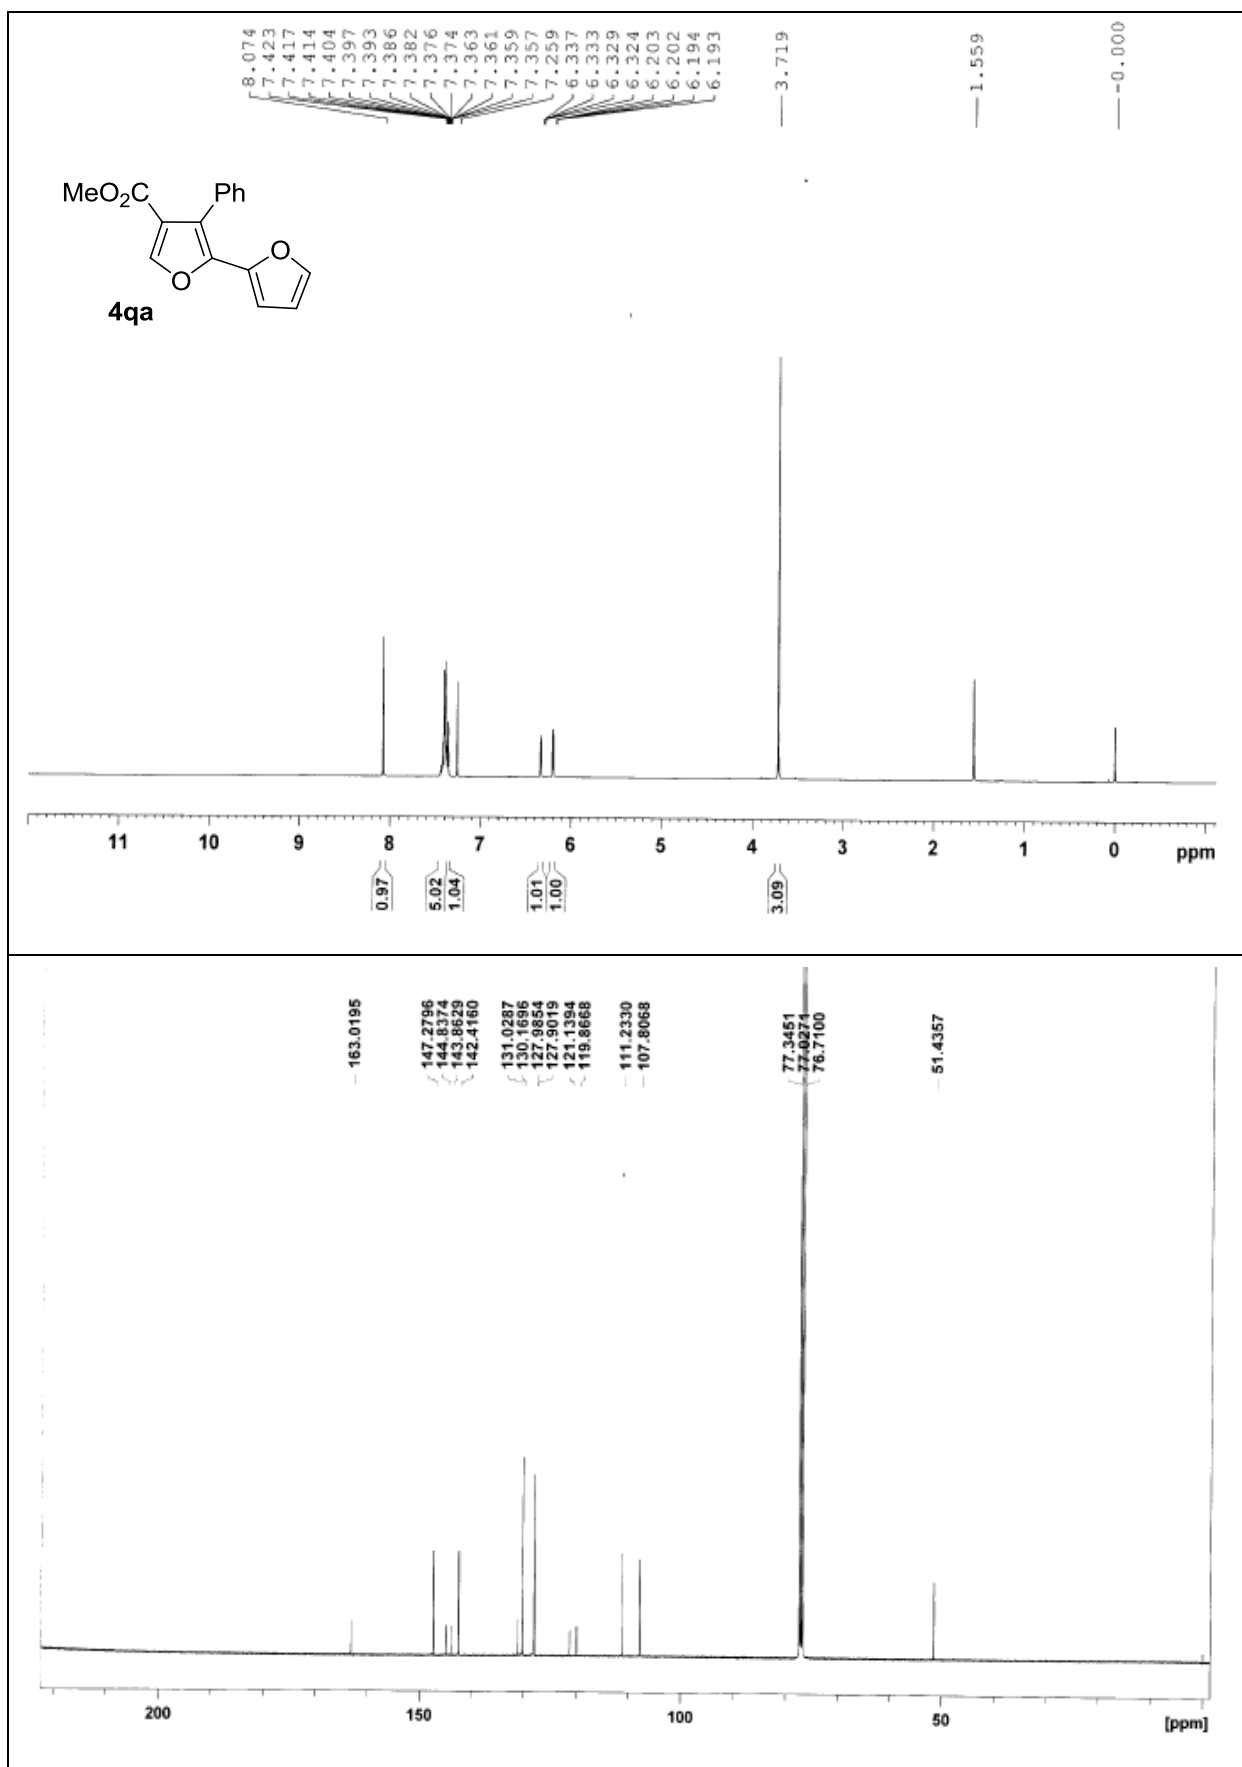

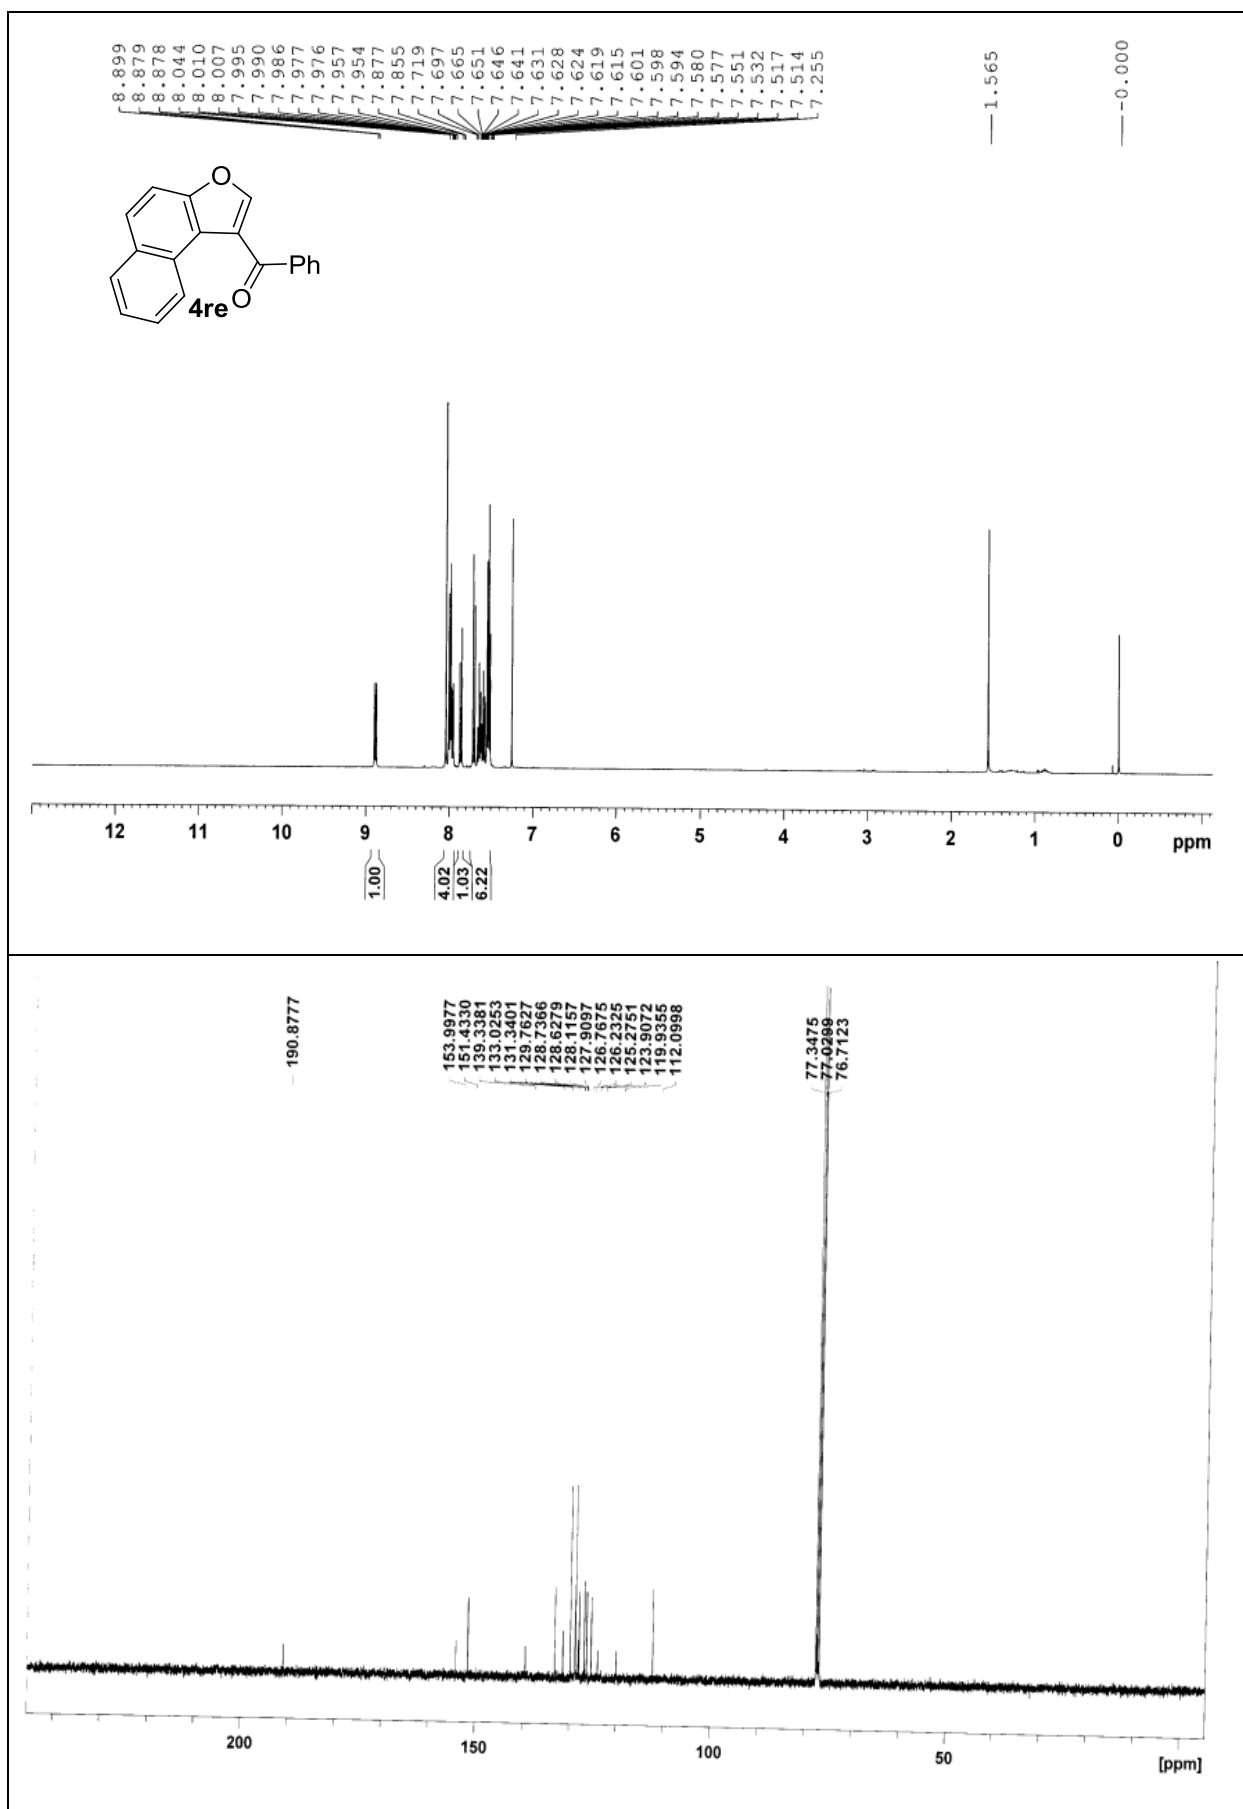

Supplement: c2cc18139h.pdf [file c2cc18139h.pdf]
